# Supplementary material for: Application of Nazarov type electrocyclization to access [6,5,6] and [6,5,5] core embedded new polycycles: an easy entry to tetrahydrofluorene scaffolds related to Taiwaniaquinoids and C-nor-D homosteroids
Source: Royal Society of Chemistry journal article supplement (doi:10.1039/c0ob00892c), 2011-01-01
Supplement: c0ob00892c.pdf [file c0ob00892c.pdf]

## Supporting Information-2

# Application of Nazarov type electrocyclization to access [6-5-6] and [6-5-5] core embedded new Polycycles: an easy entry to tetrahydrofluorene scaffolds related to Taiwaniaquinoids and C-*nor*-D *homo* steroids<sup>#</sup>

Ritesh Singh and Gautam Panda\*

*Medicinal and Process Chemistry Division, Central Drug Research Institute, Lucknow-226001, UP, India*

[gautam.panda@gmail.com](mailto:gautam.panda@gmail.com), [gautam\\_panda@cdri.res.in](mailto:gautam_panda@cdri.res.in)

1. Spectra

Fig. S1- S 45

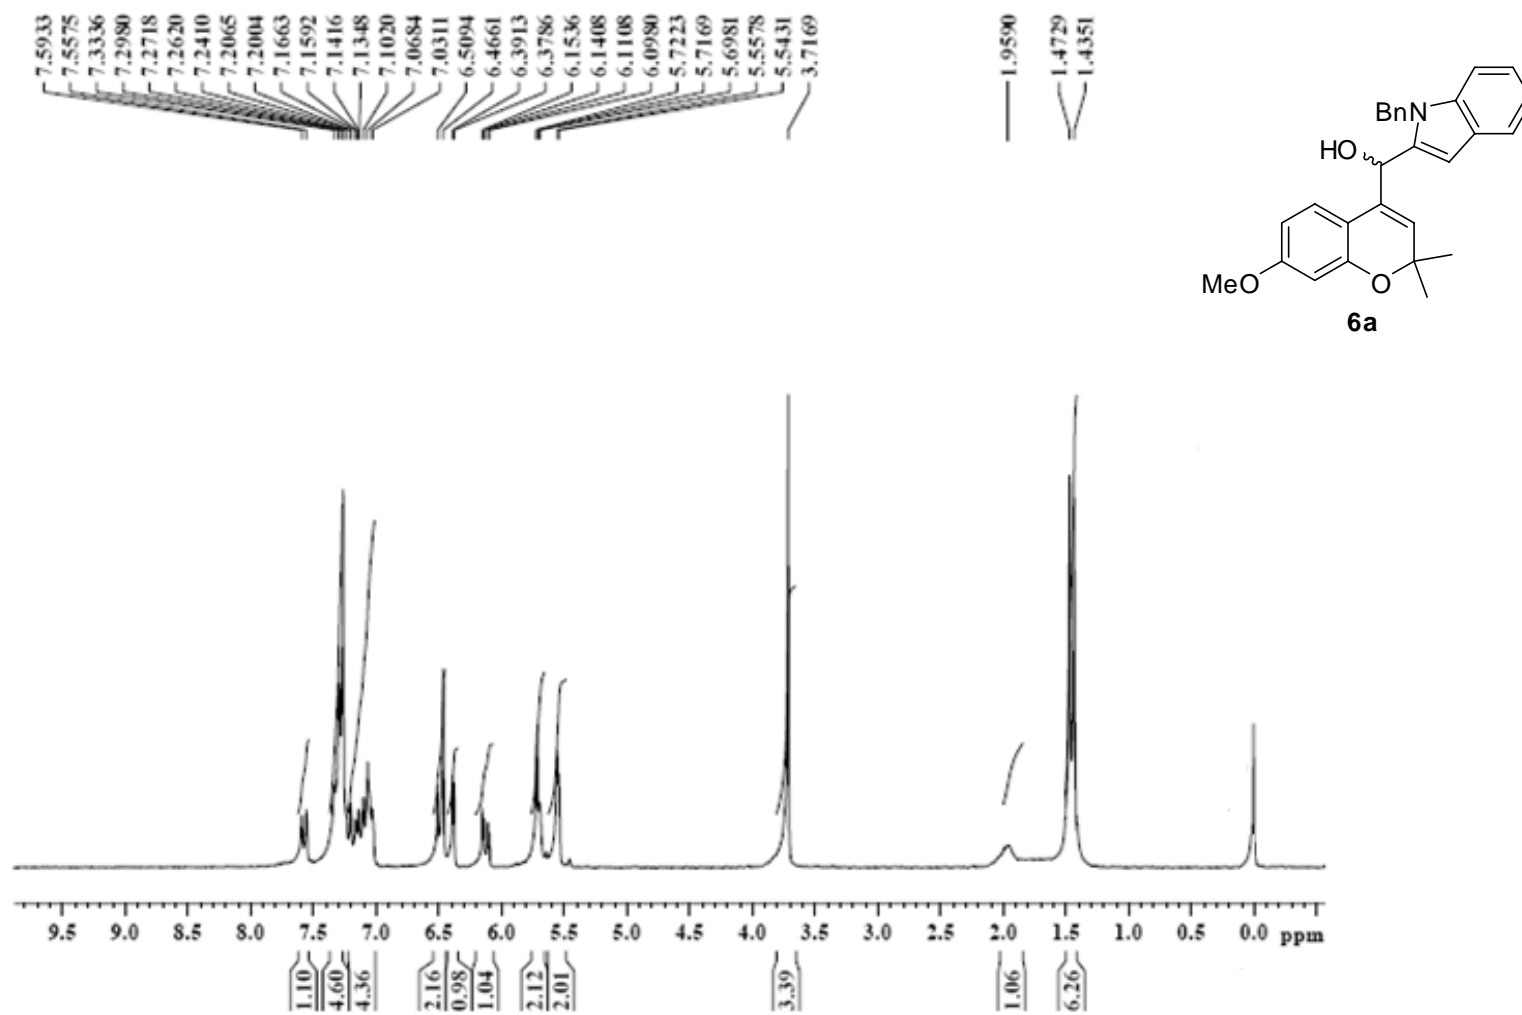

Fig. S-1: <sup>1</sup>H NMR of (1-Benzyl-1H-indol-2-yl)(7-methoxy-2,2-dimethyl-2H-chromen-4-yl)methanol (6a)

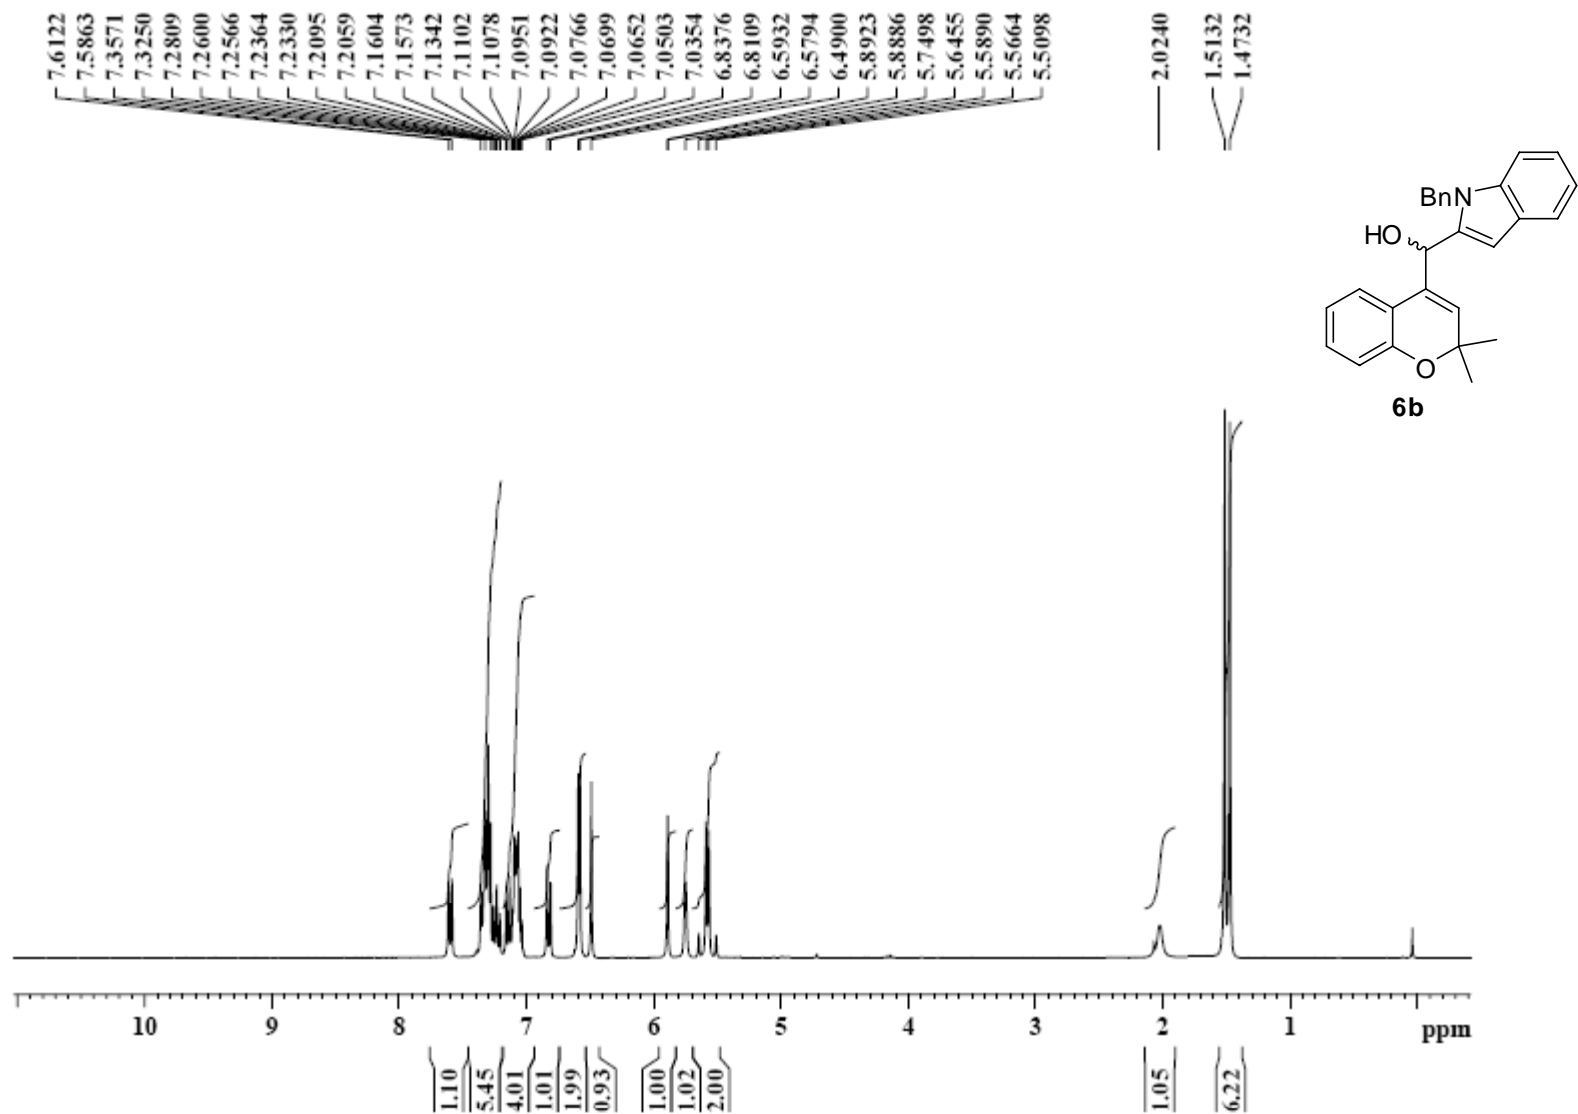

Fig. S-2:  $^1\text{H}$  NMR of (1-Benzyl-1H-indol-2-yl)(2,2-dimethyl-2H-chromen-4-yl)methanol (**6b**)

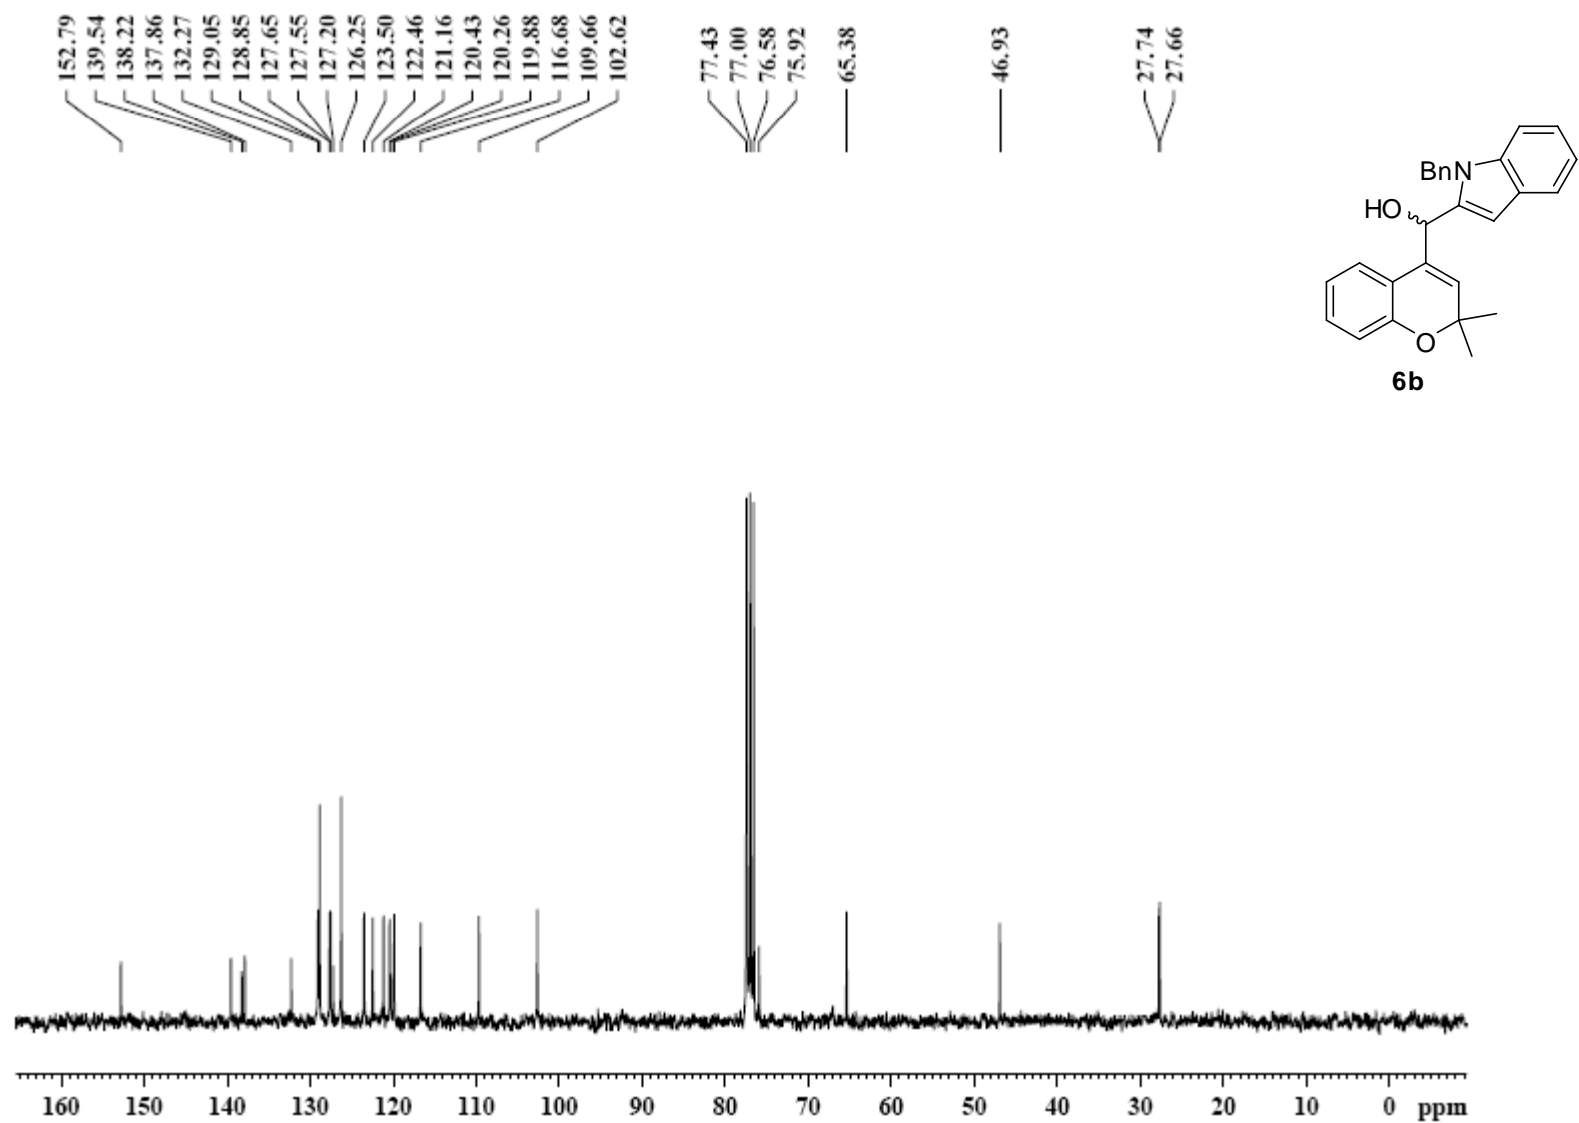

Fig. S-3: : <sup>13</sup>C NMR of (1-Benzyl-1H-indol-2-yl)(2,2-dimethyl-2H-chromen-4-yl)methanol (6b)

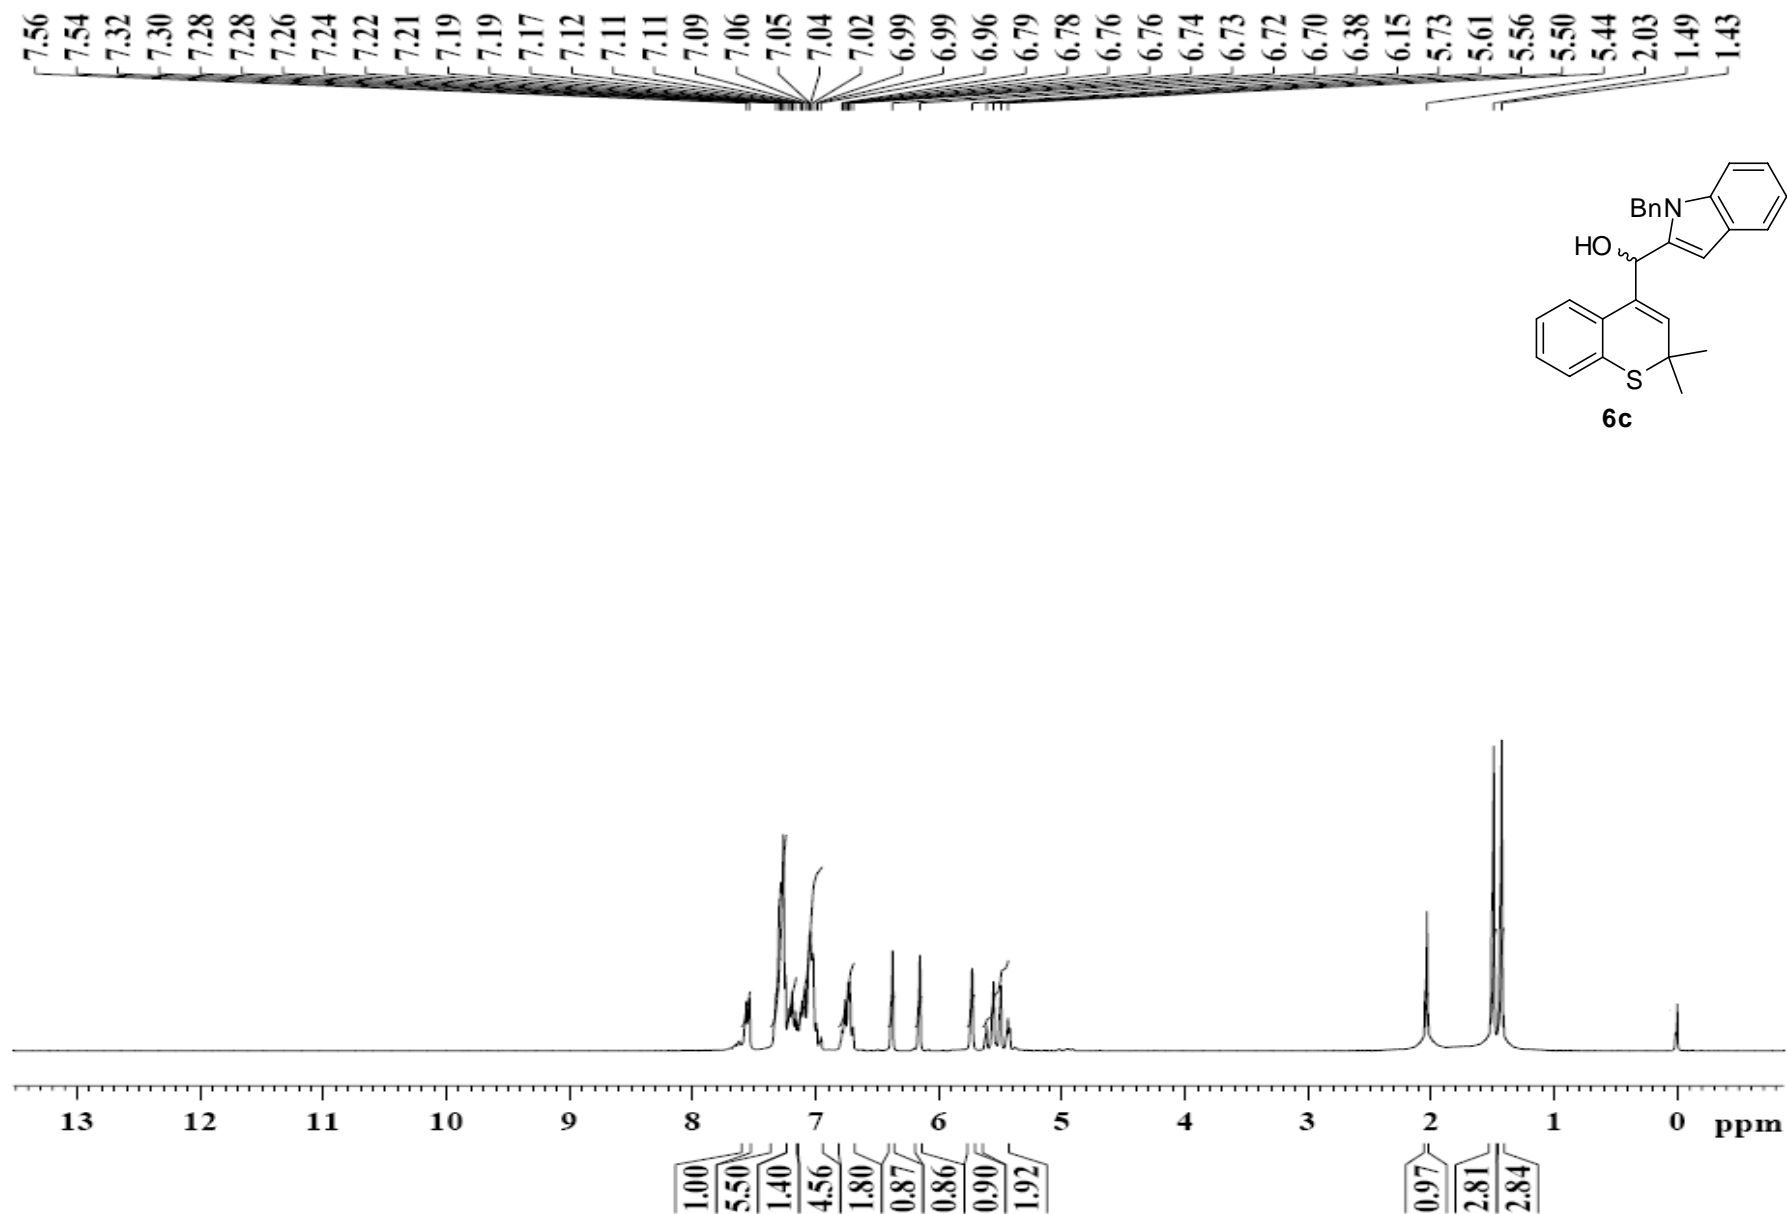

Fig. S-4: <sup>1</sup>H NMR of ((1-benzyl-1H-indol-2-yl)(2,2-dimethyl-2H-thiochromen-4-yl)methanol(6c)

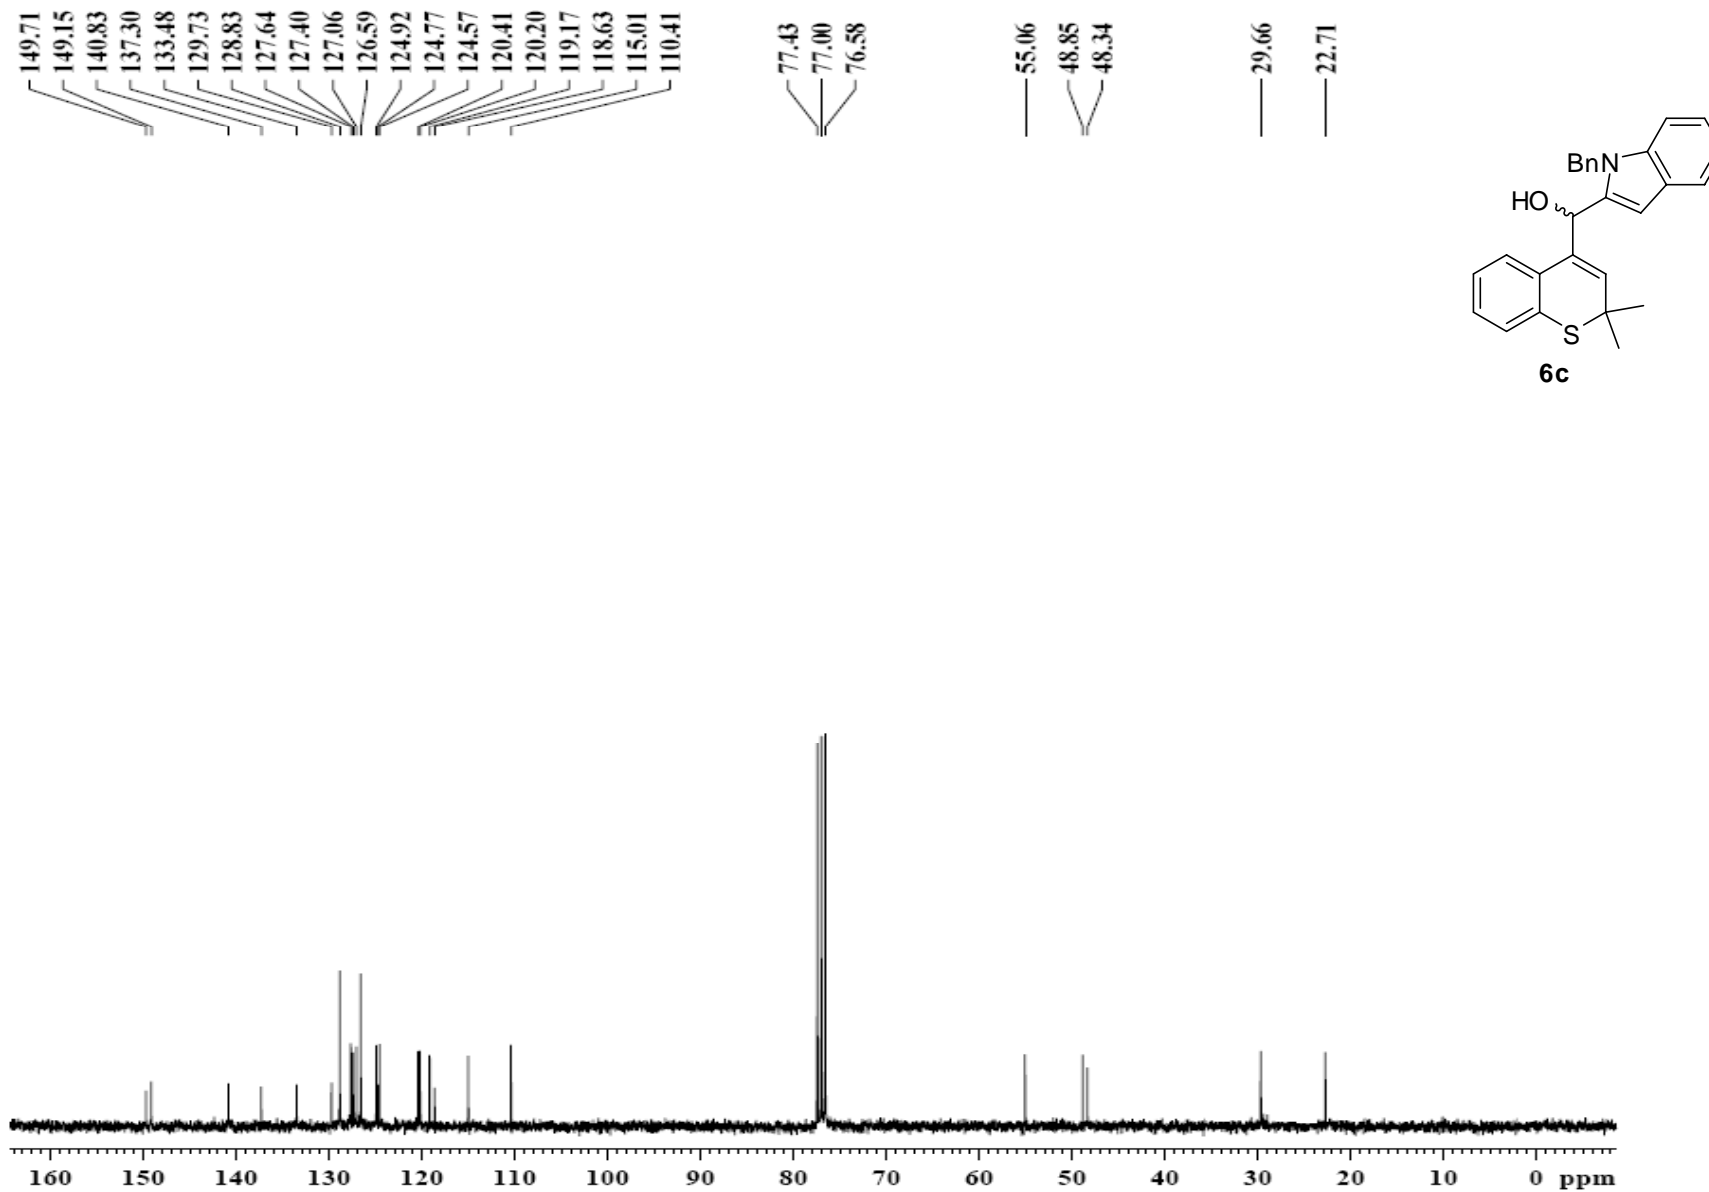

Fig. S-5: <sup>13</sup>C NMR of (1-benzyl-1H-indol-2-yl)(2,2-dimethyl-2H-thiochromen-4-yl)methanol(6c)

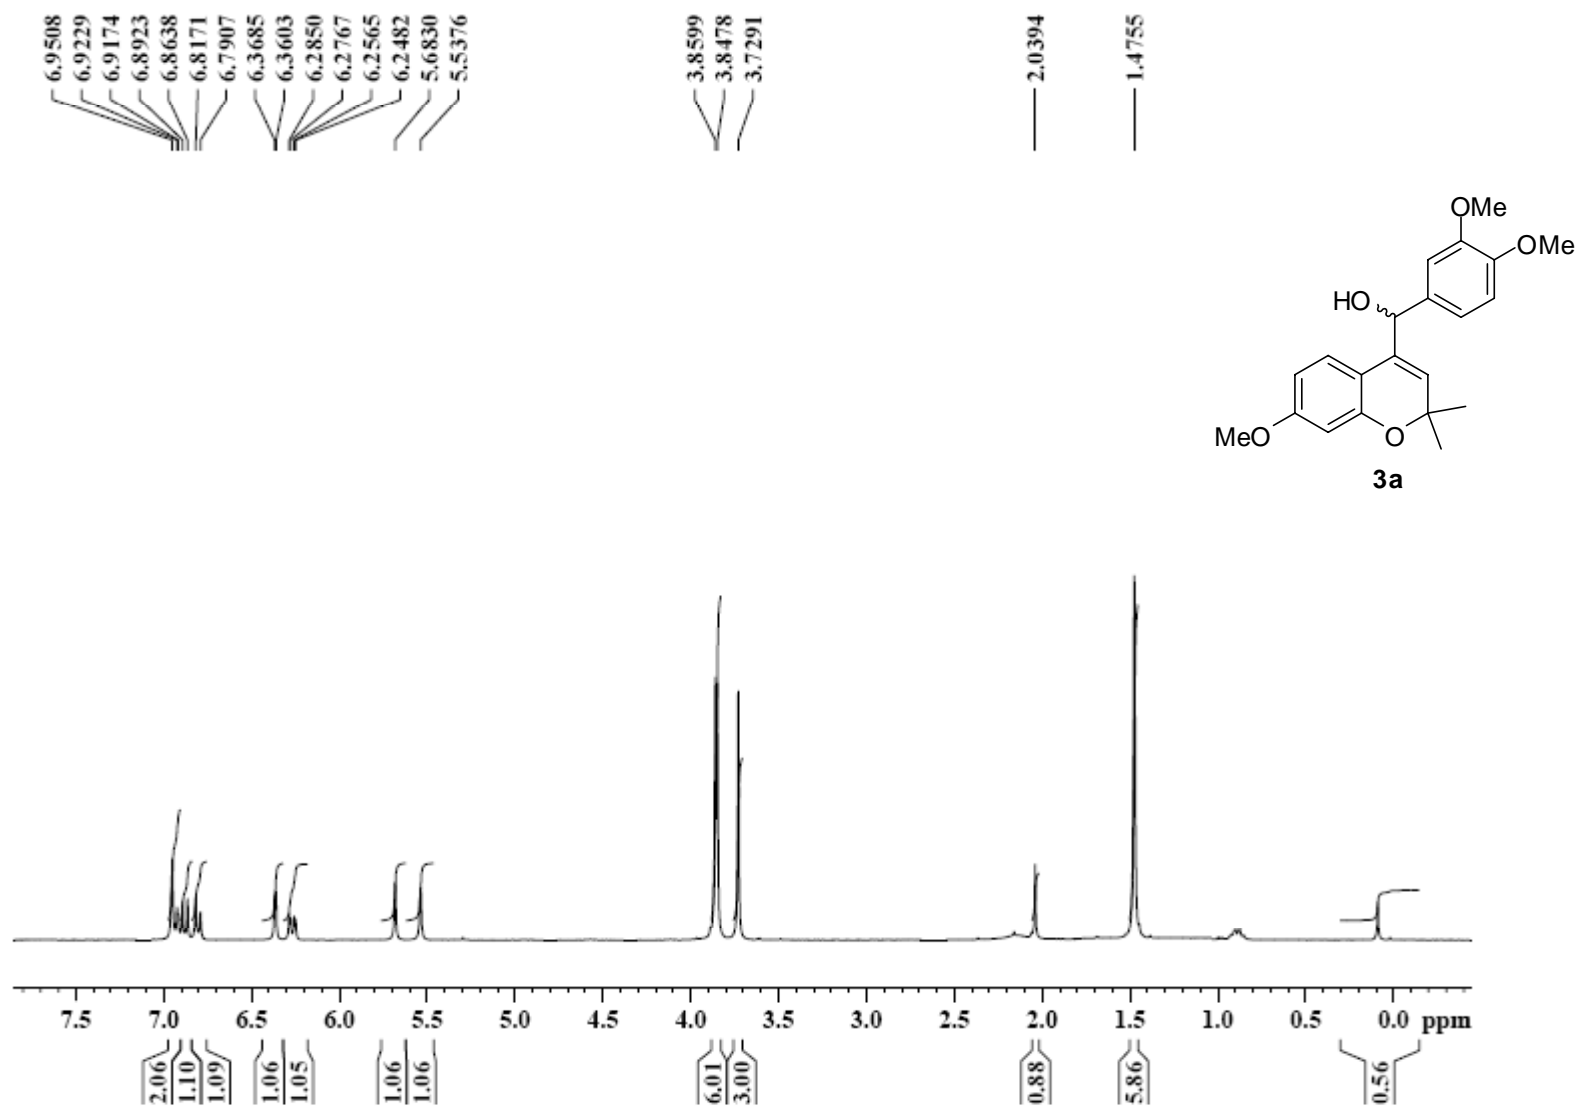

Fig. S-6: <sup>1</sup>H NMR of (3,4-Dimethoxyphenyl)(7-methoxy-2,2-dimethyl-2H-chromen-4-yl)methanol (3a)

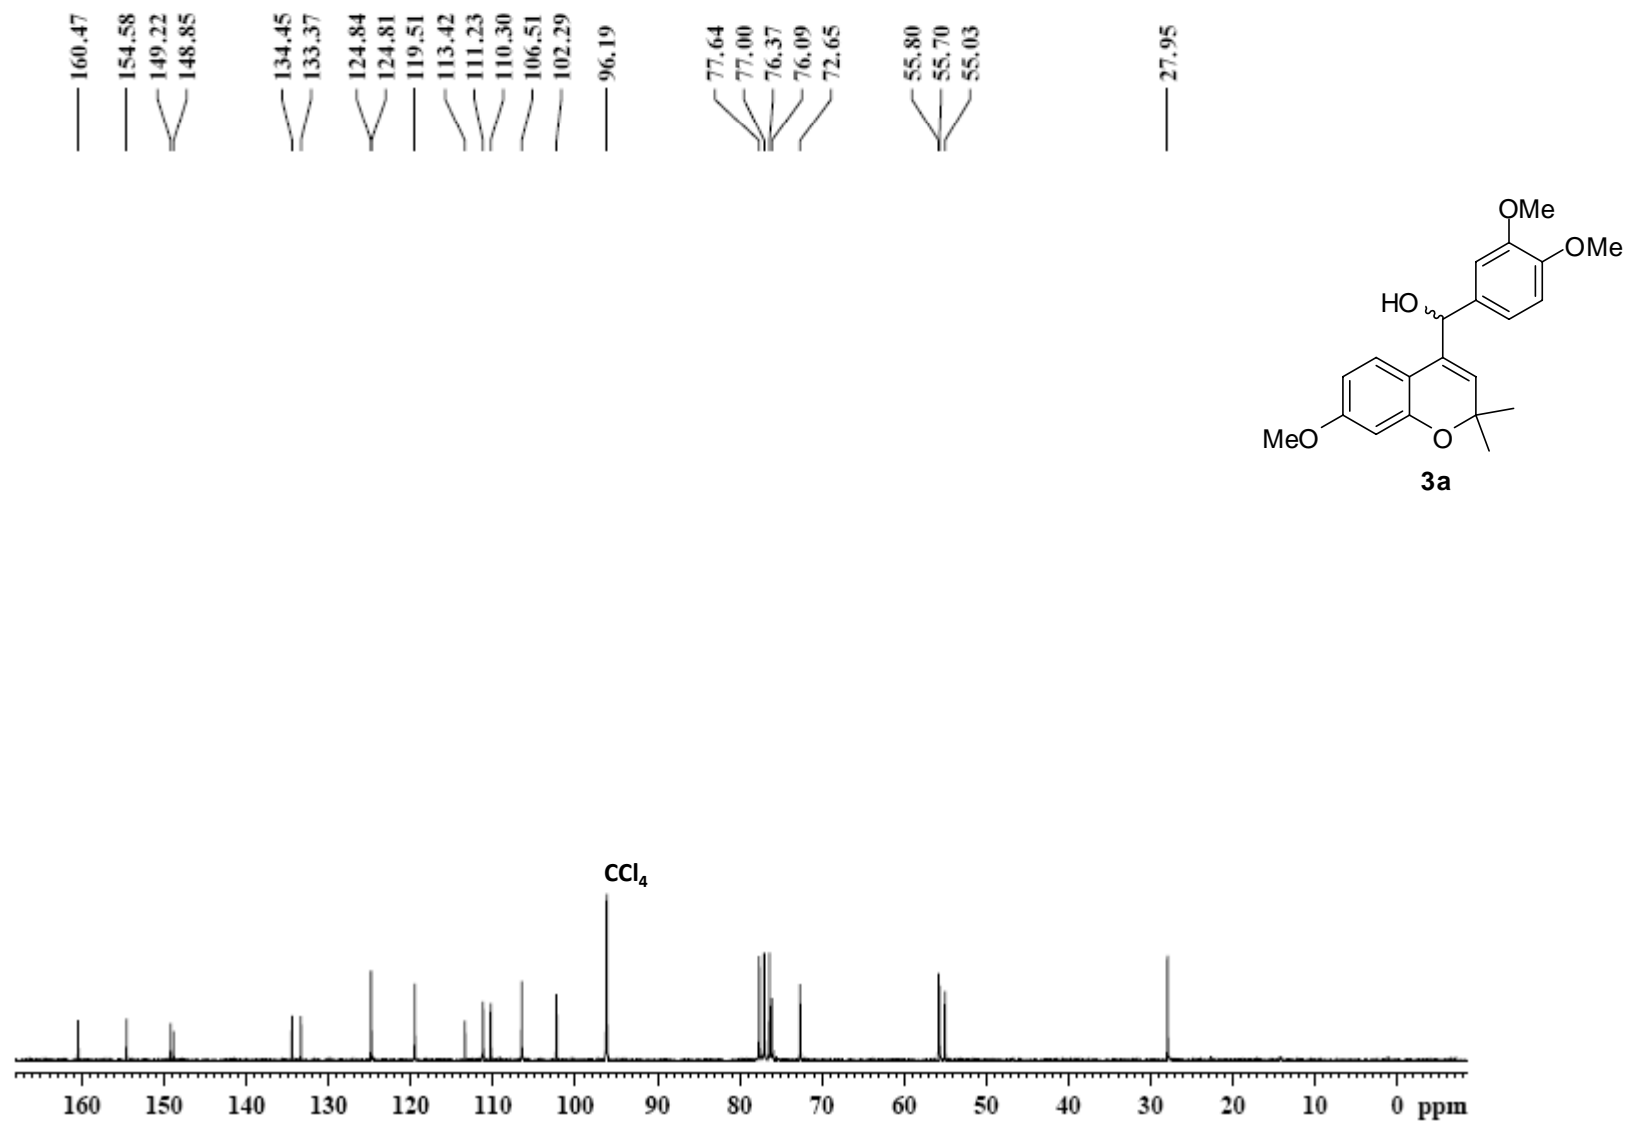

Fig. S-7: <sup>13</sup>C NMR of (3,4-Dimethoxyphenyl)(7-methoxy-2,2-dimethyl-2H-chromen-4-yl)methanol (3a)



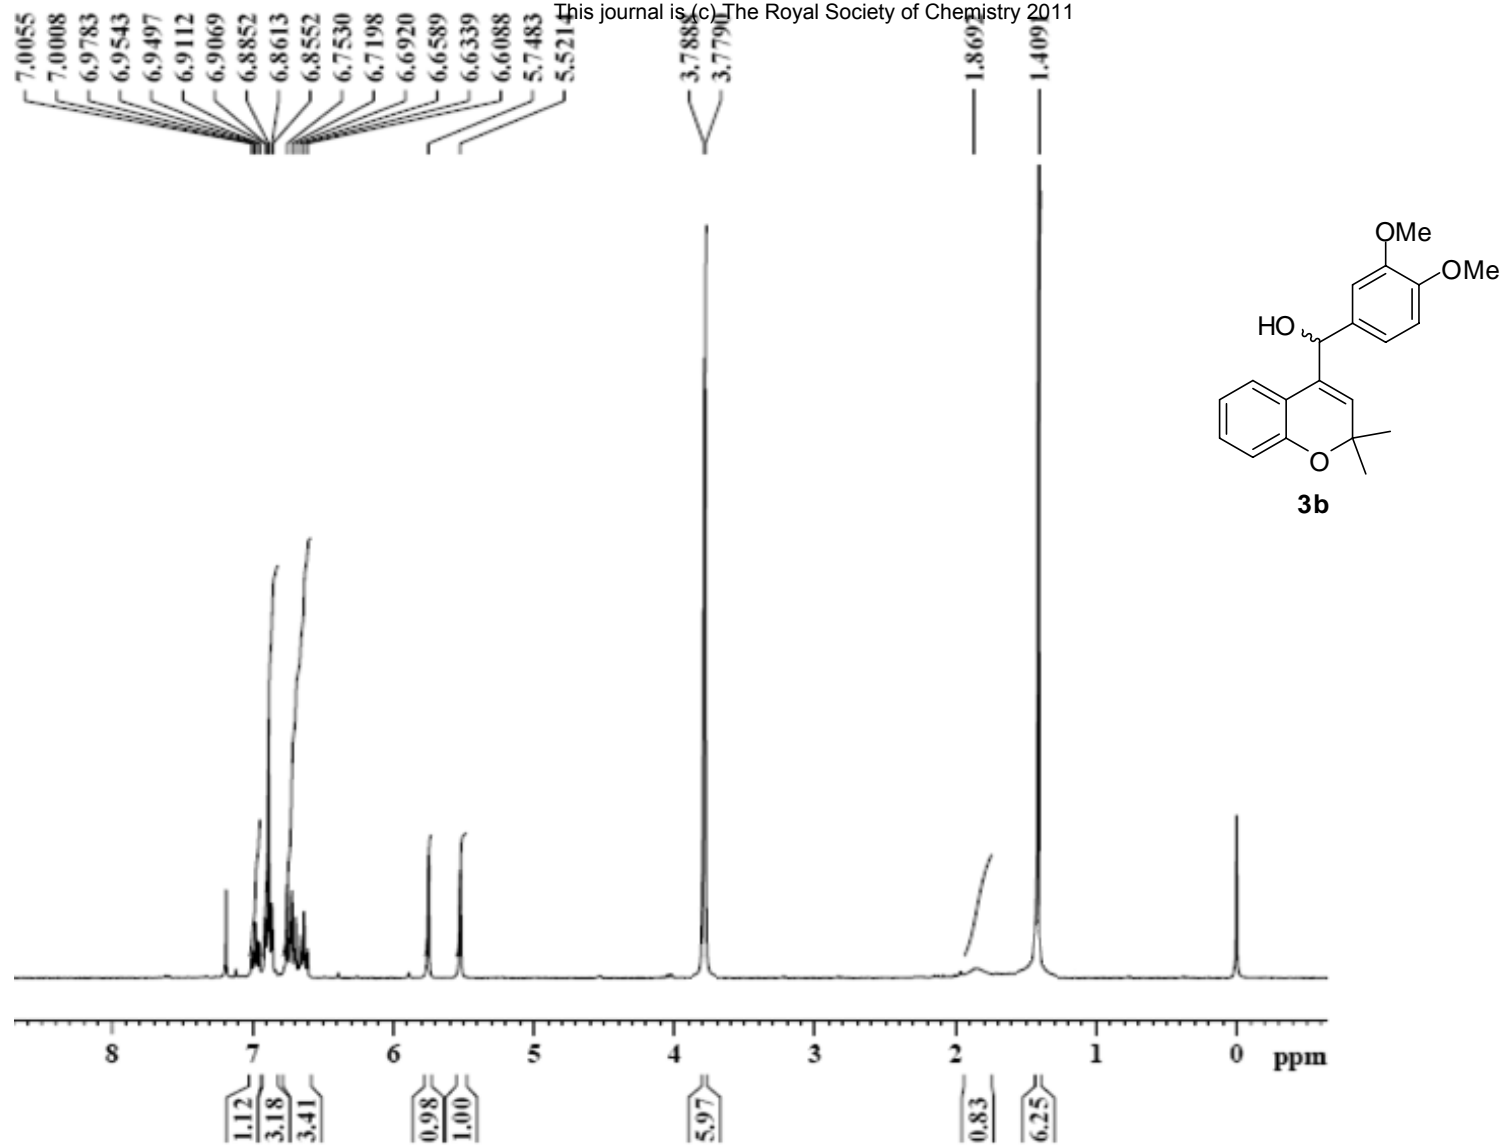

Fig. S-8: <sup>1</sup>H NMR of (3,4-Dimethoxyphenyl)(2,2-dimethyl-2H-chromen-4-yl)methanol (3b)

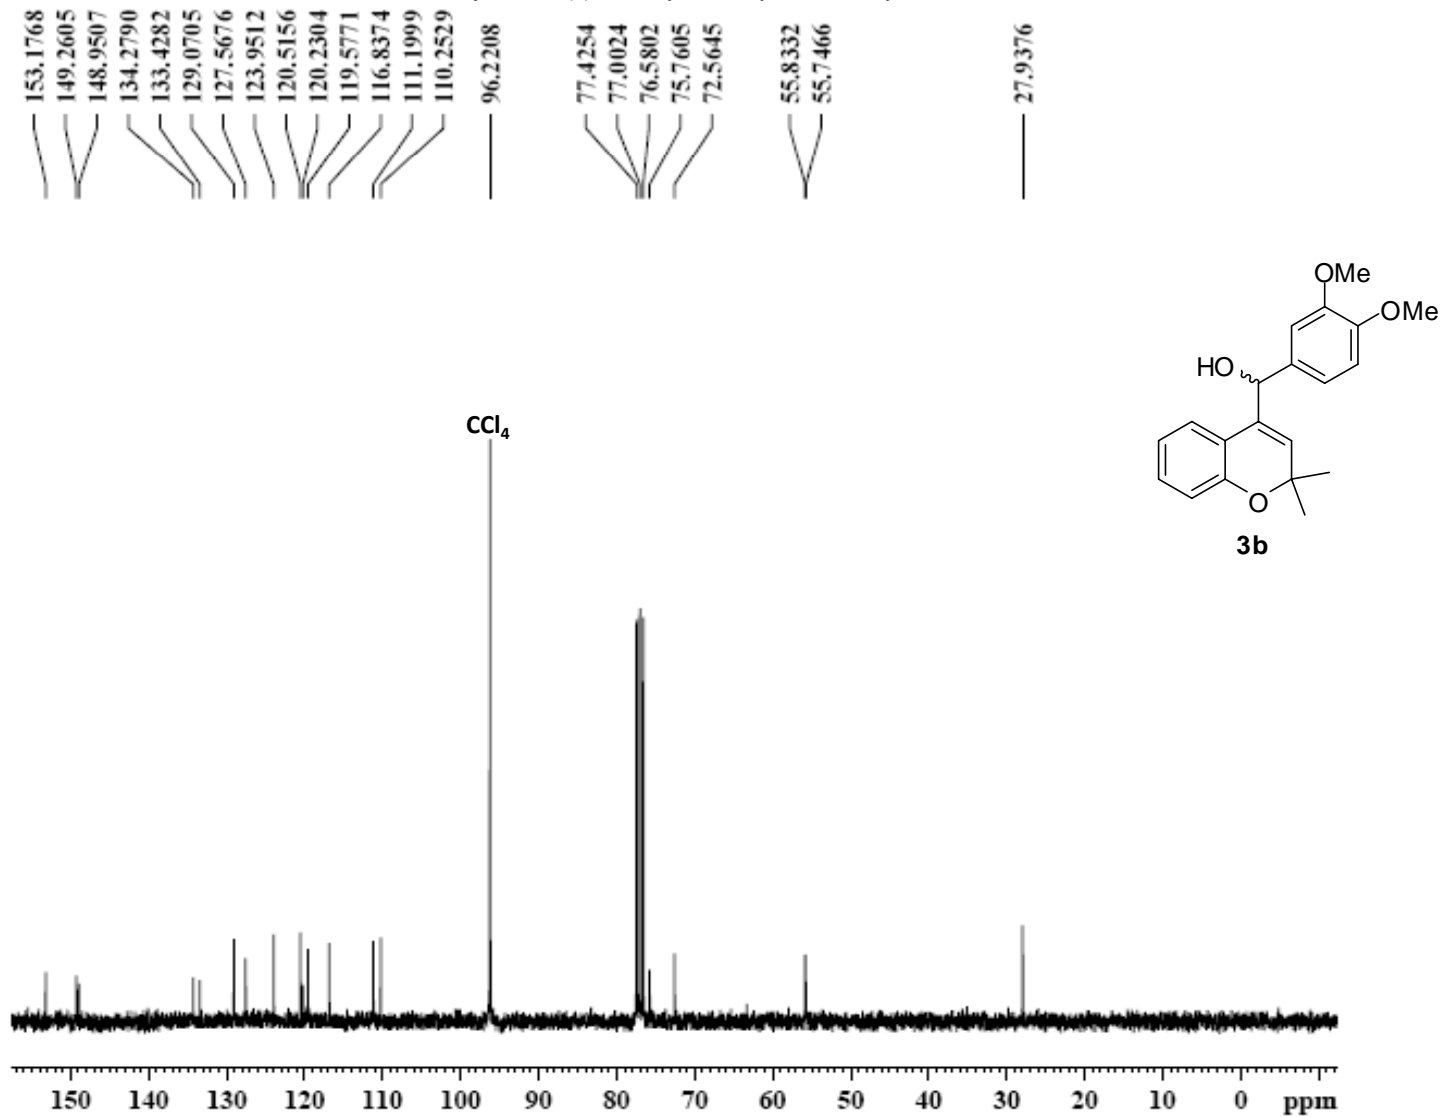

Fig. S-9:  $^{13}\text{C}$  NMR of (3,4-Dimethoxyphenyl)(2,2-dimethyl-2H-chromen-4-yl)methanol (3b)

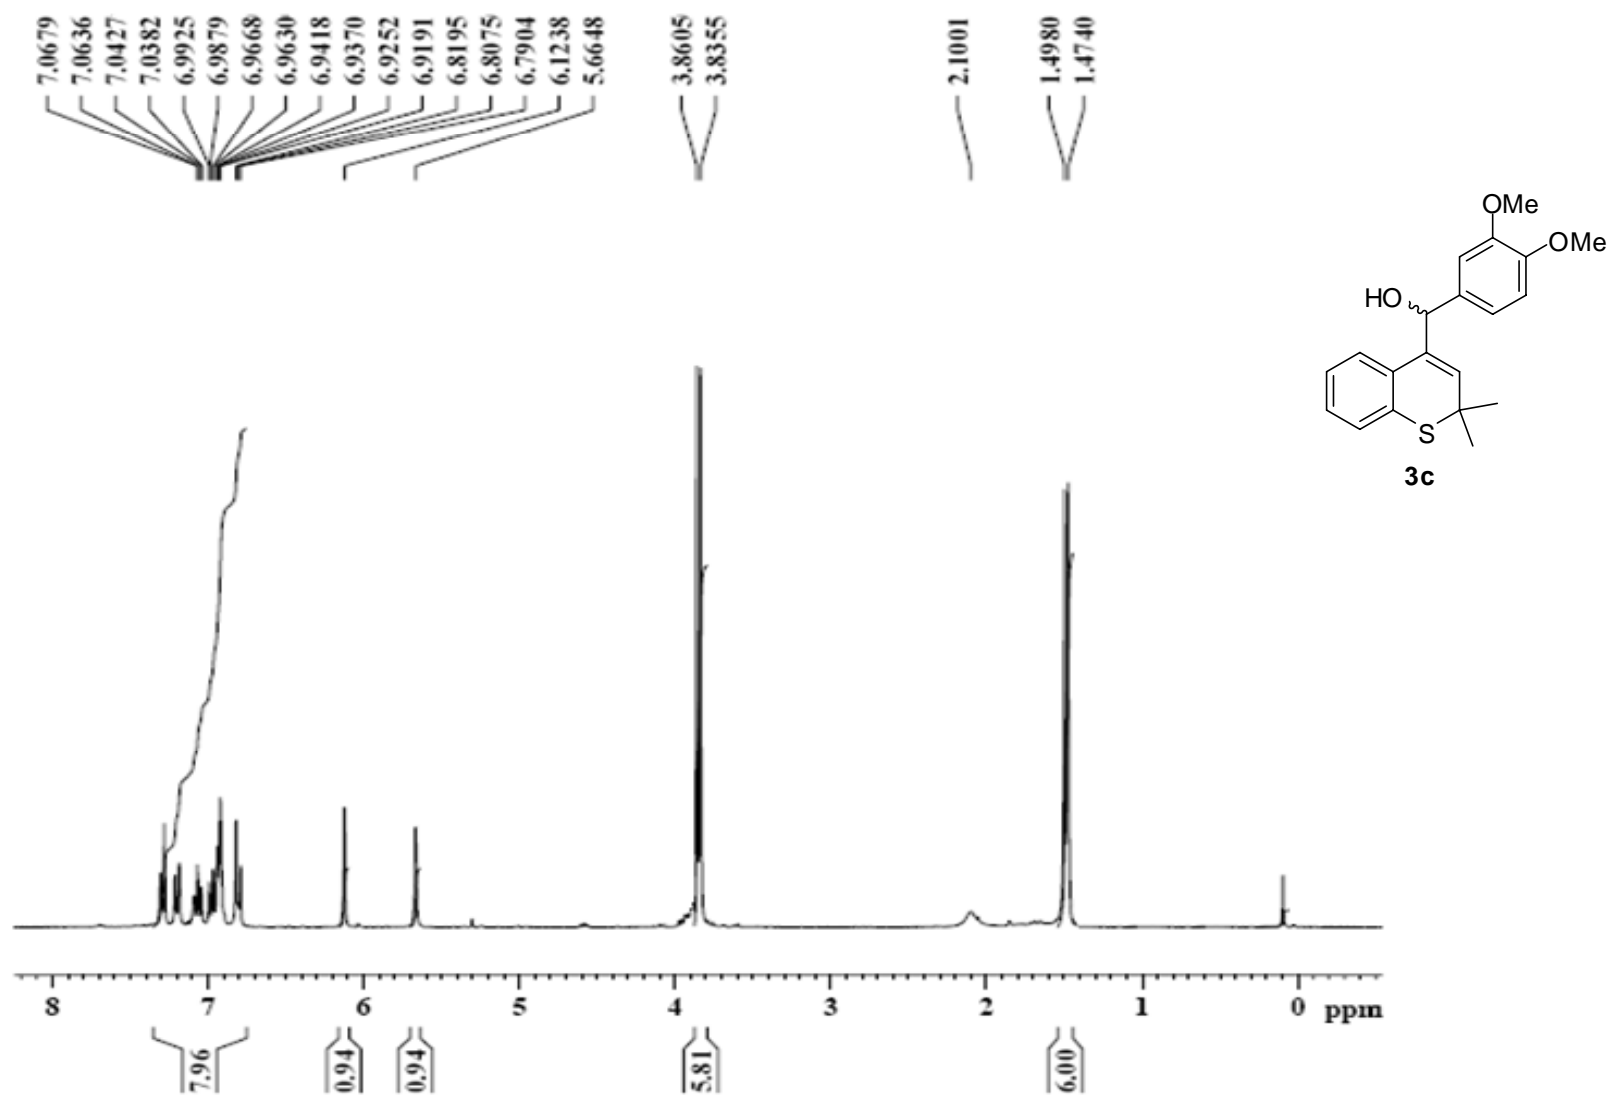

Fig. S-10: <sup>1</sup>H NMR of (3,4-Dimethoxyphenyl)(2,2-dimethyl-2H-thiochromen-4-yl)methanol (3c)

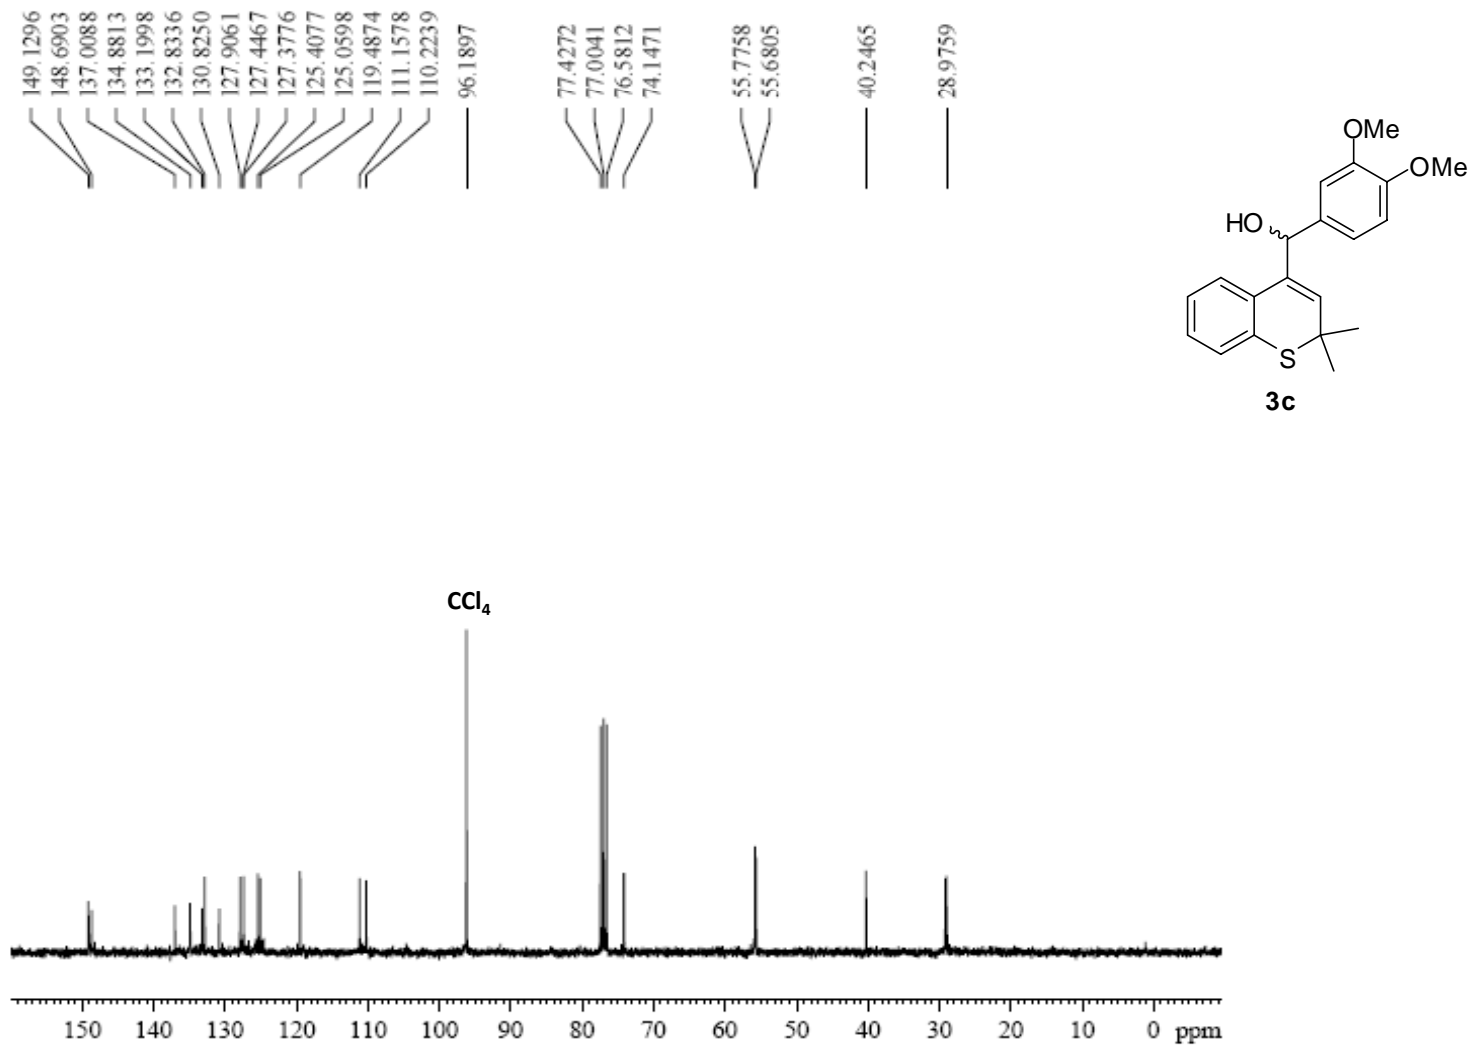

Fig. S-11:  $^{13}\text{C}$  NMR of (3,4-Dimethoxyphenyl)(2,2-dimethyl-2H-thiophen-4-yl)methanol (**3c**)

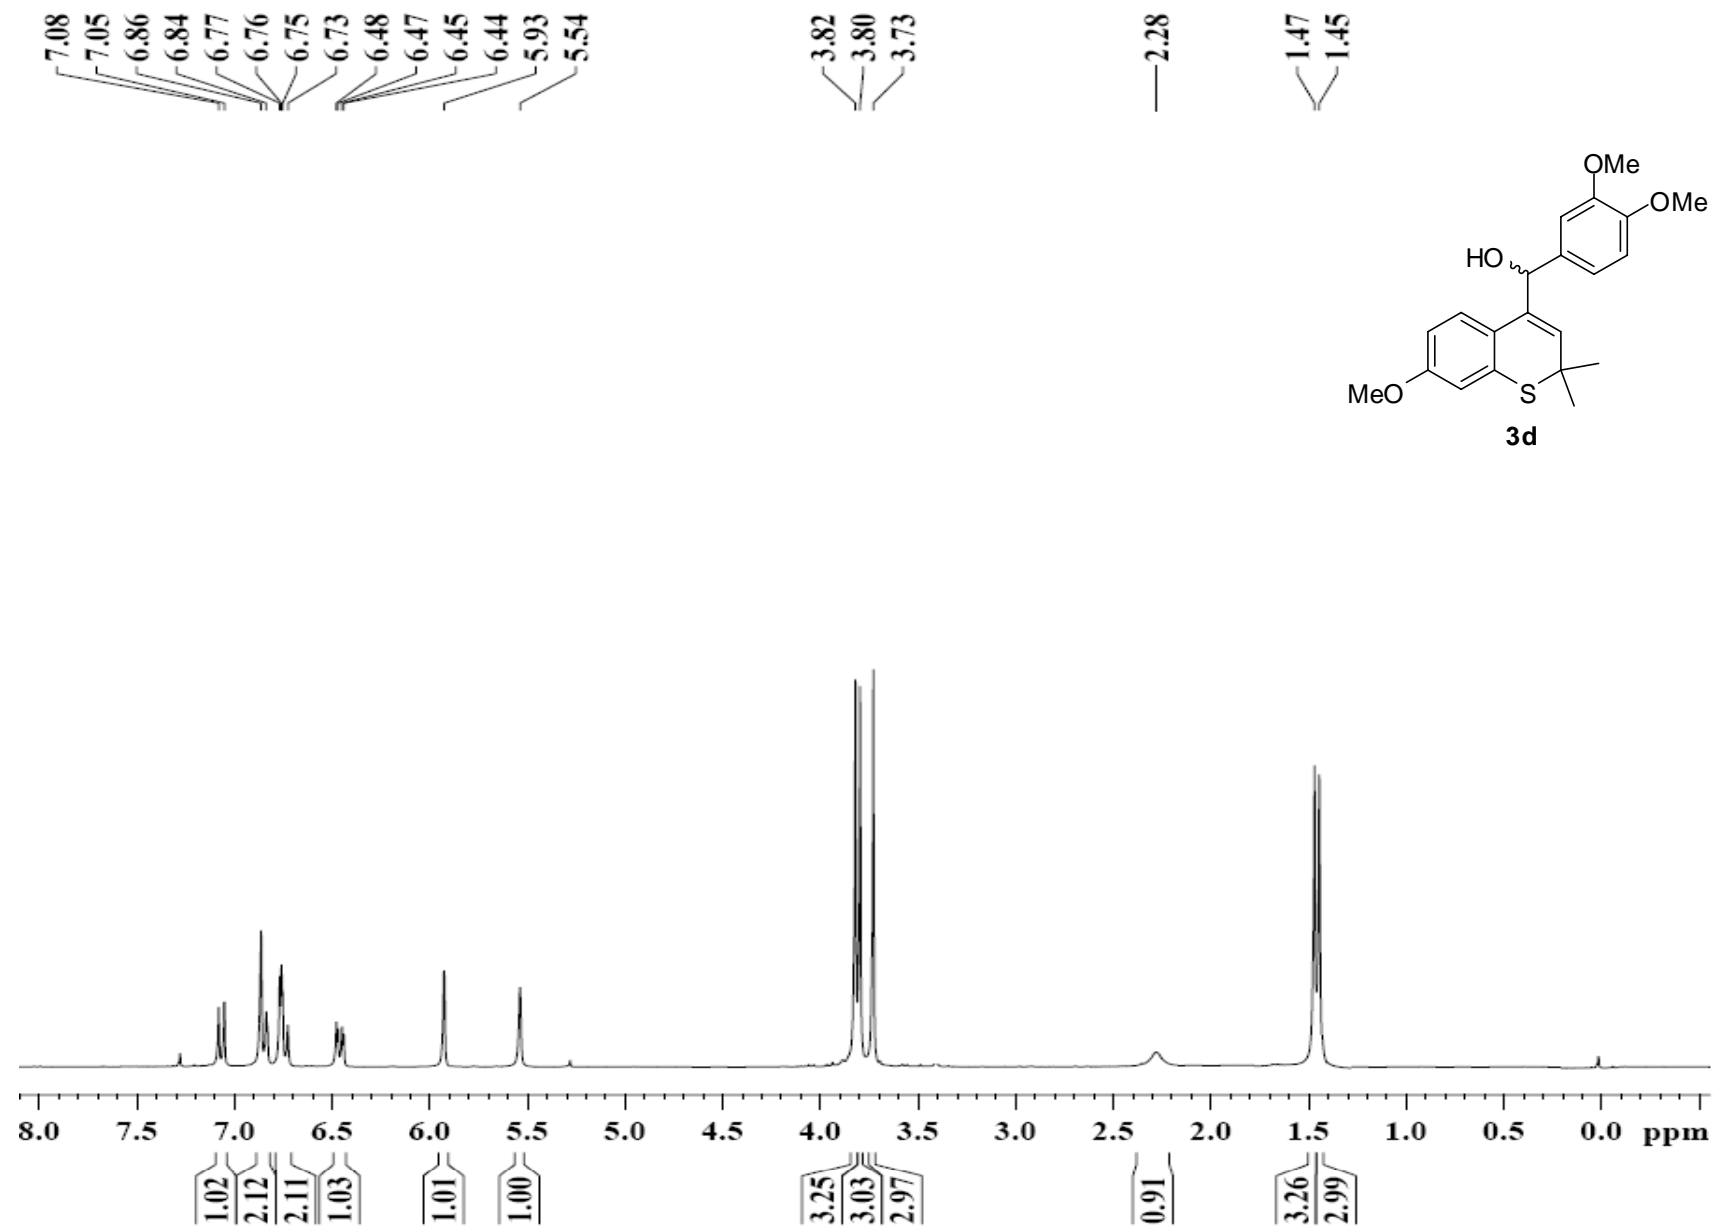

Fig. S-12: <sup>1</sup>H NMR of (3,4-dimethoxyphenyl)(7-methoxy-2,2-dimethyl-2H-thiochromen-4-yl)methanol (3d)

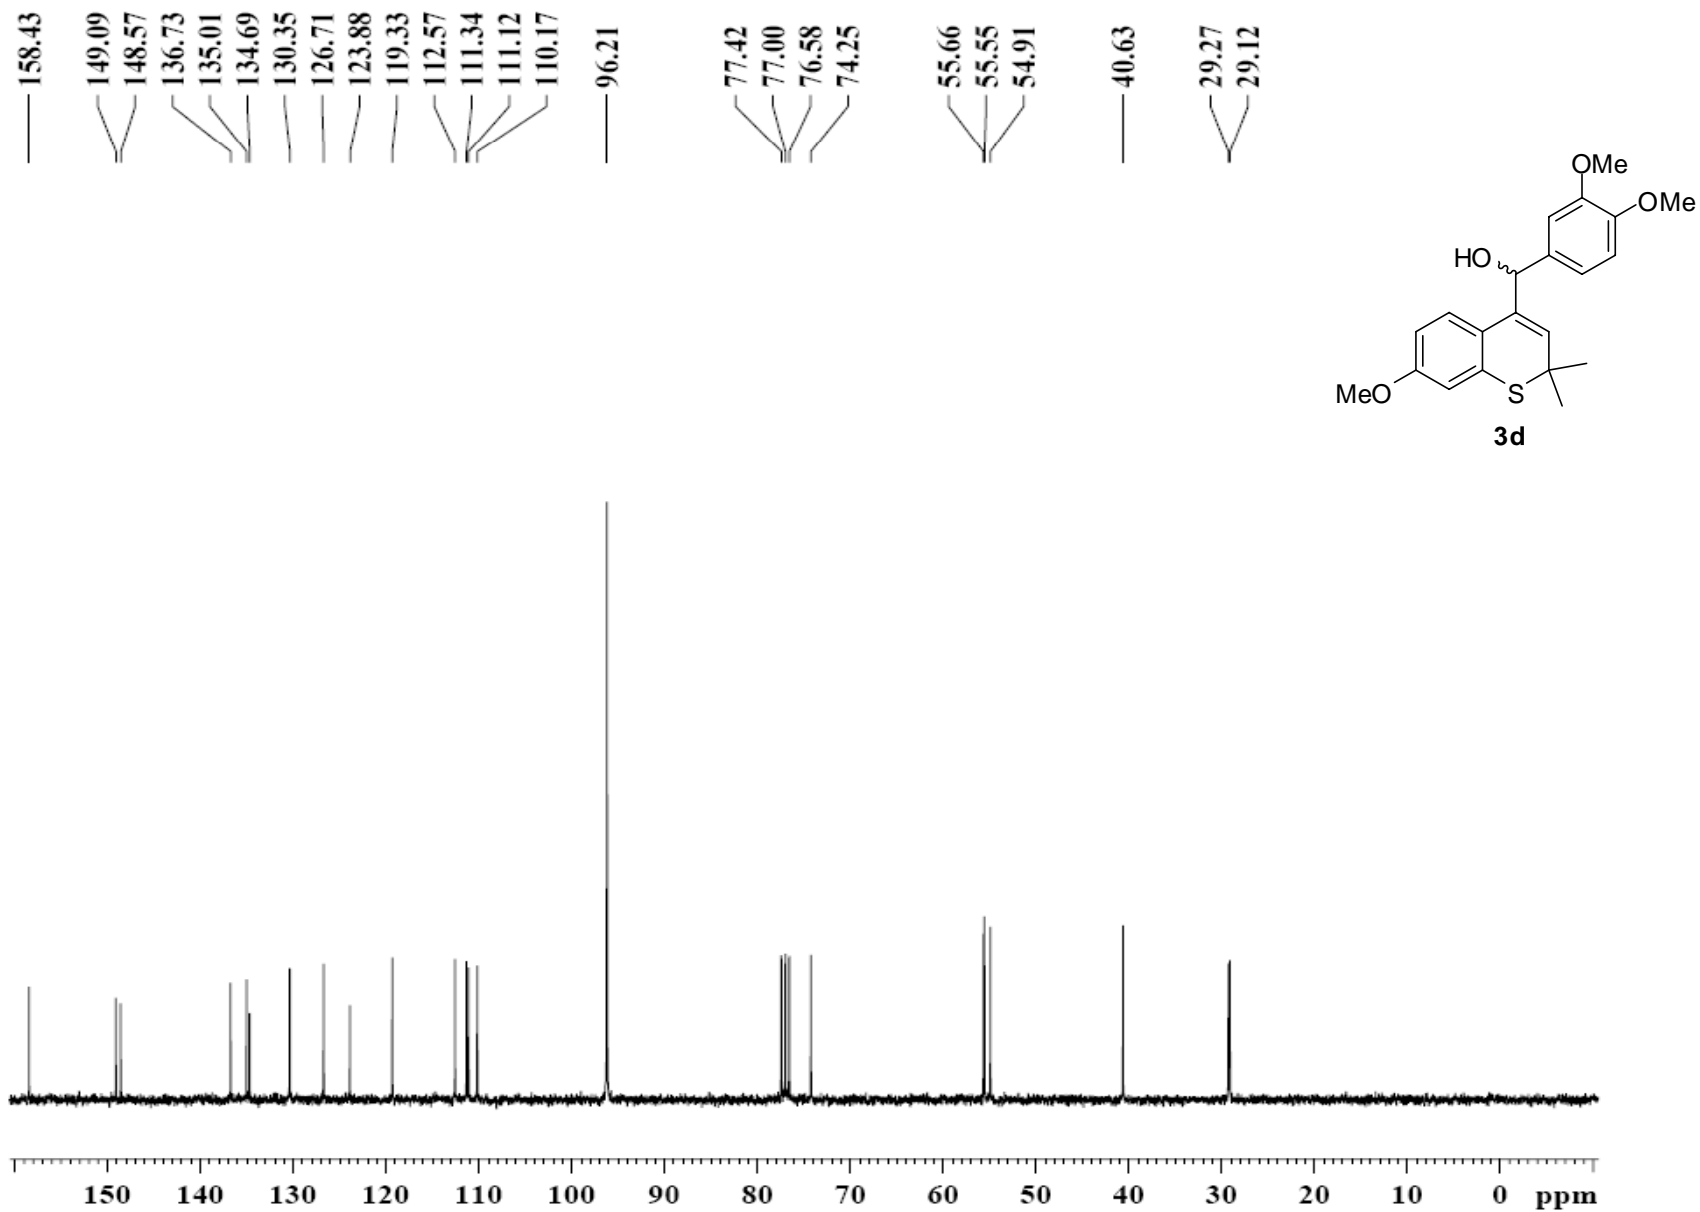

Fig. S-13: <sup>13</sup>C NMR of (3,4-dimethoxyphenyl)(7-methoxy-2,2-dimethyl-2H-thiophen-4-yl)methanol (3d)

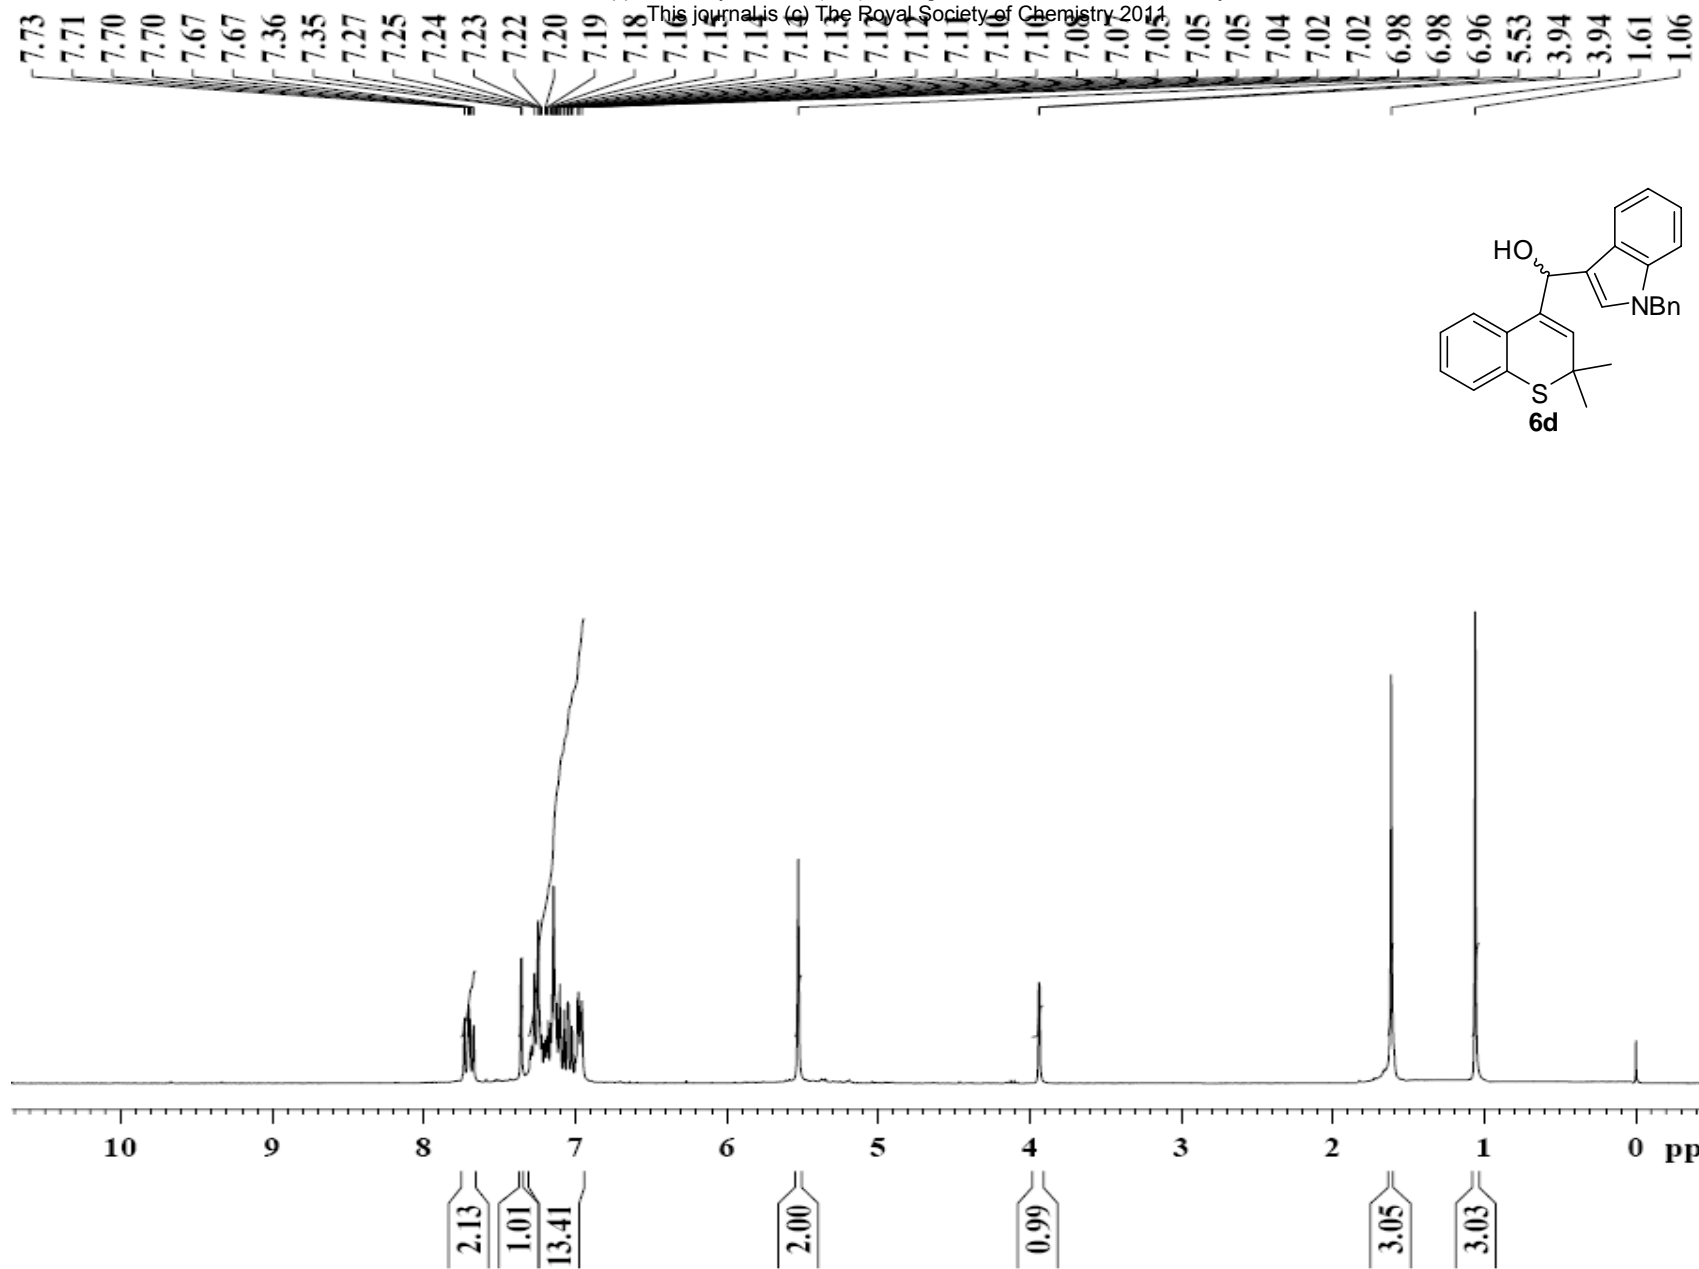

Fig. S-14: <sup>1</sup>H NMR of (1-benzyl-1H-indol-3-yl)(2,2-dimethyl-2H-thiochromen-4-yl)methanol (6d)

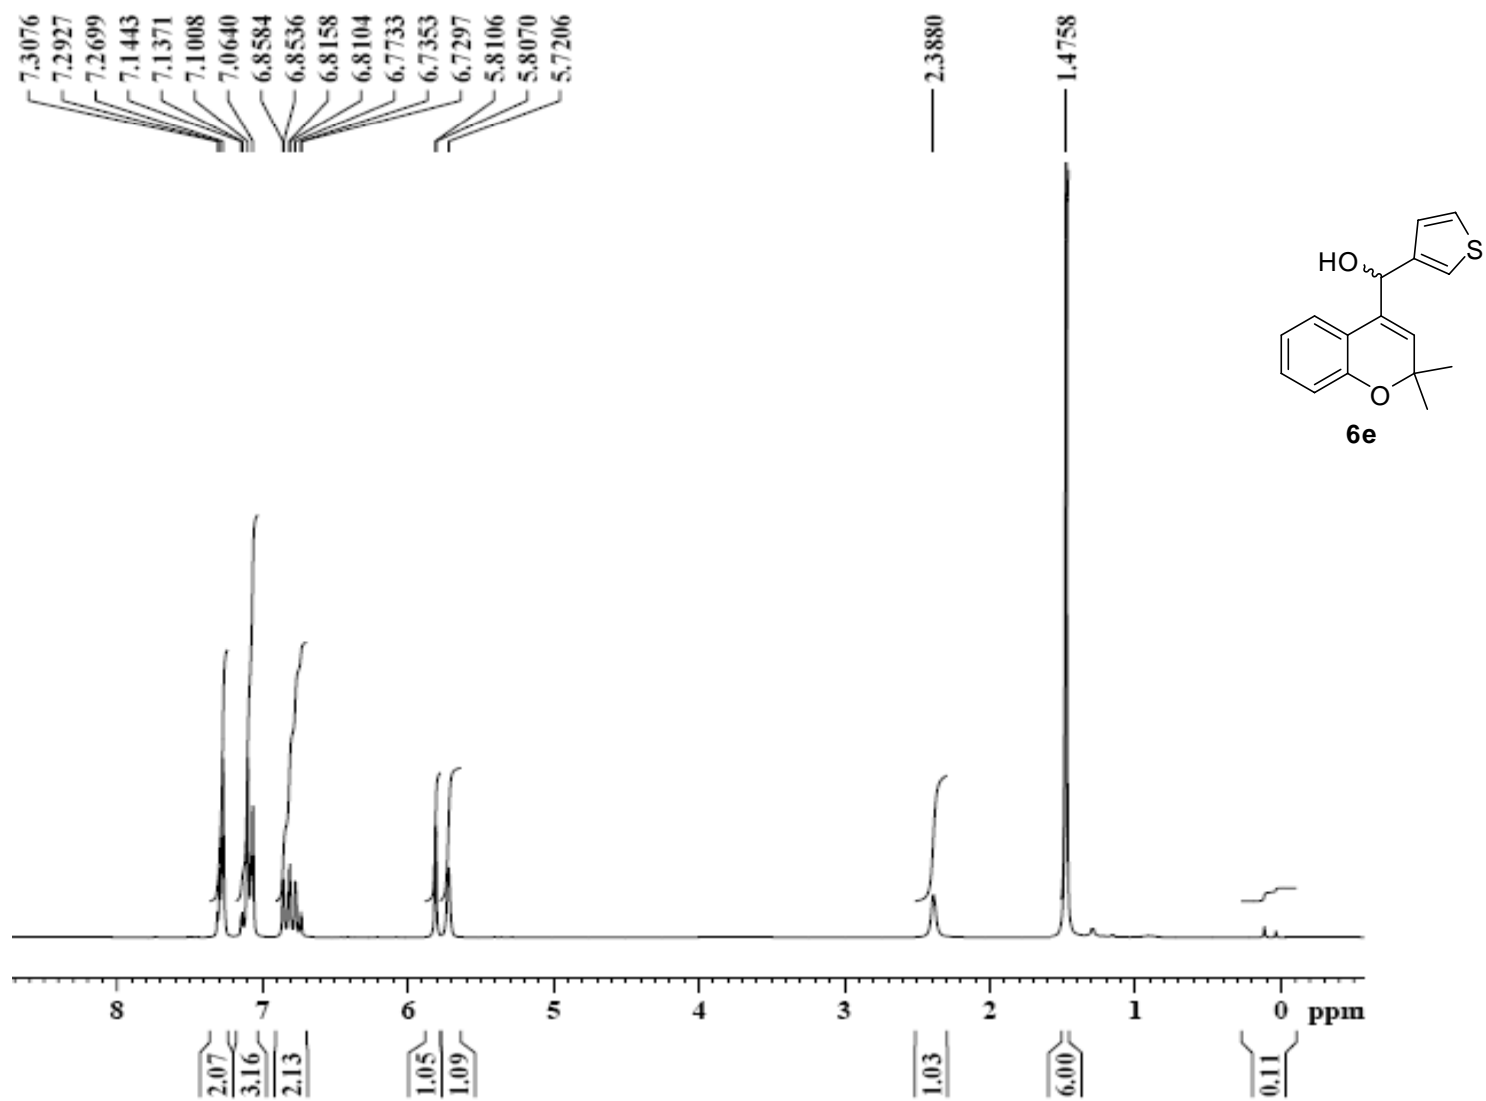

Fig. S-15: <sup>1</sup>H NMR of (2,2-Dimethyl-2H-chromen-4-yl)(thiophen-3-yl)methanol (6e)



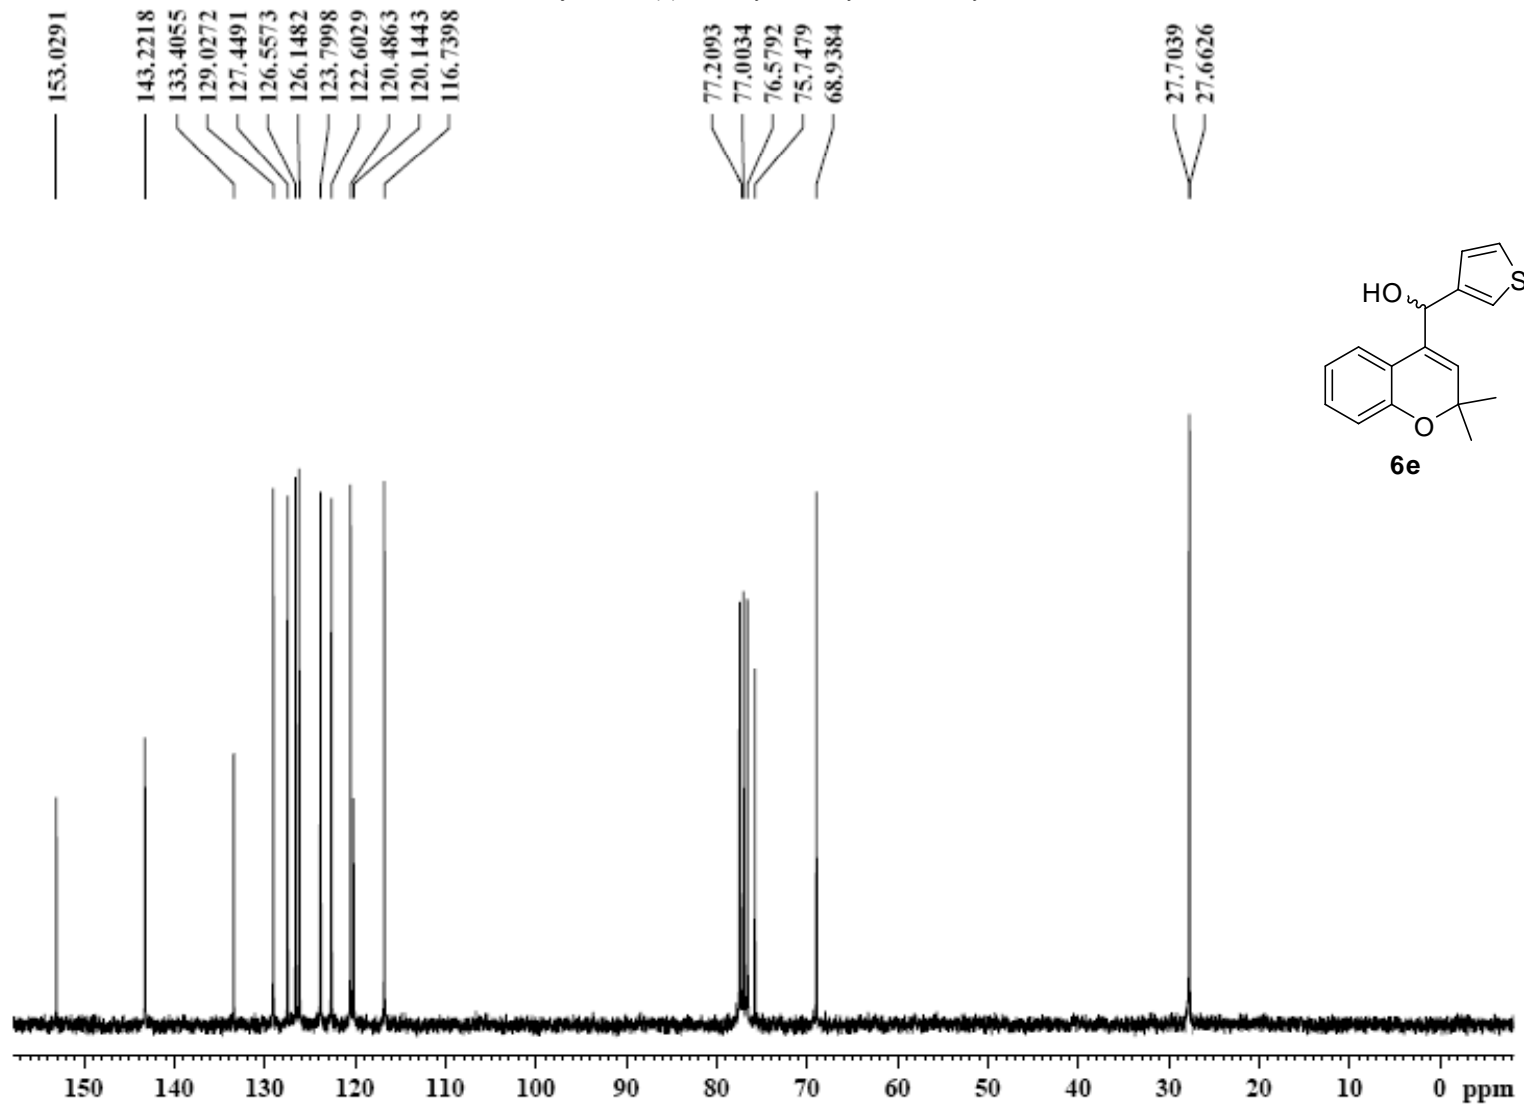

Fig. S-16:  $^{13}\text{C}$  NMR of (2,2-Dimethyl-2H-chromen-4-yl)(thiophen-3-yl)methanol (6e)

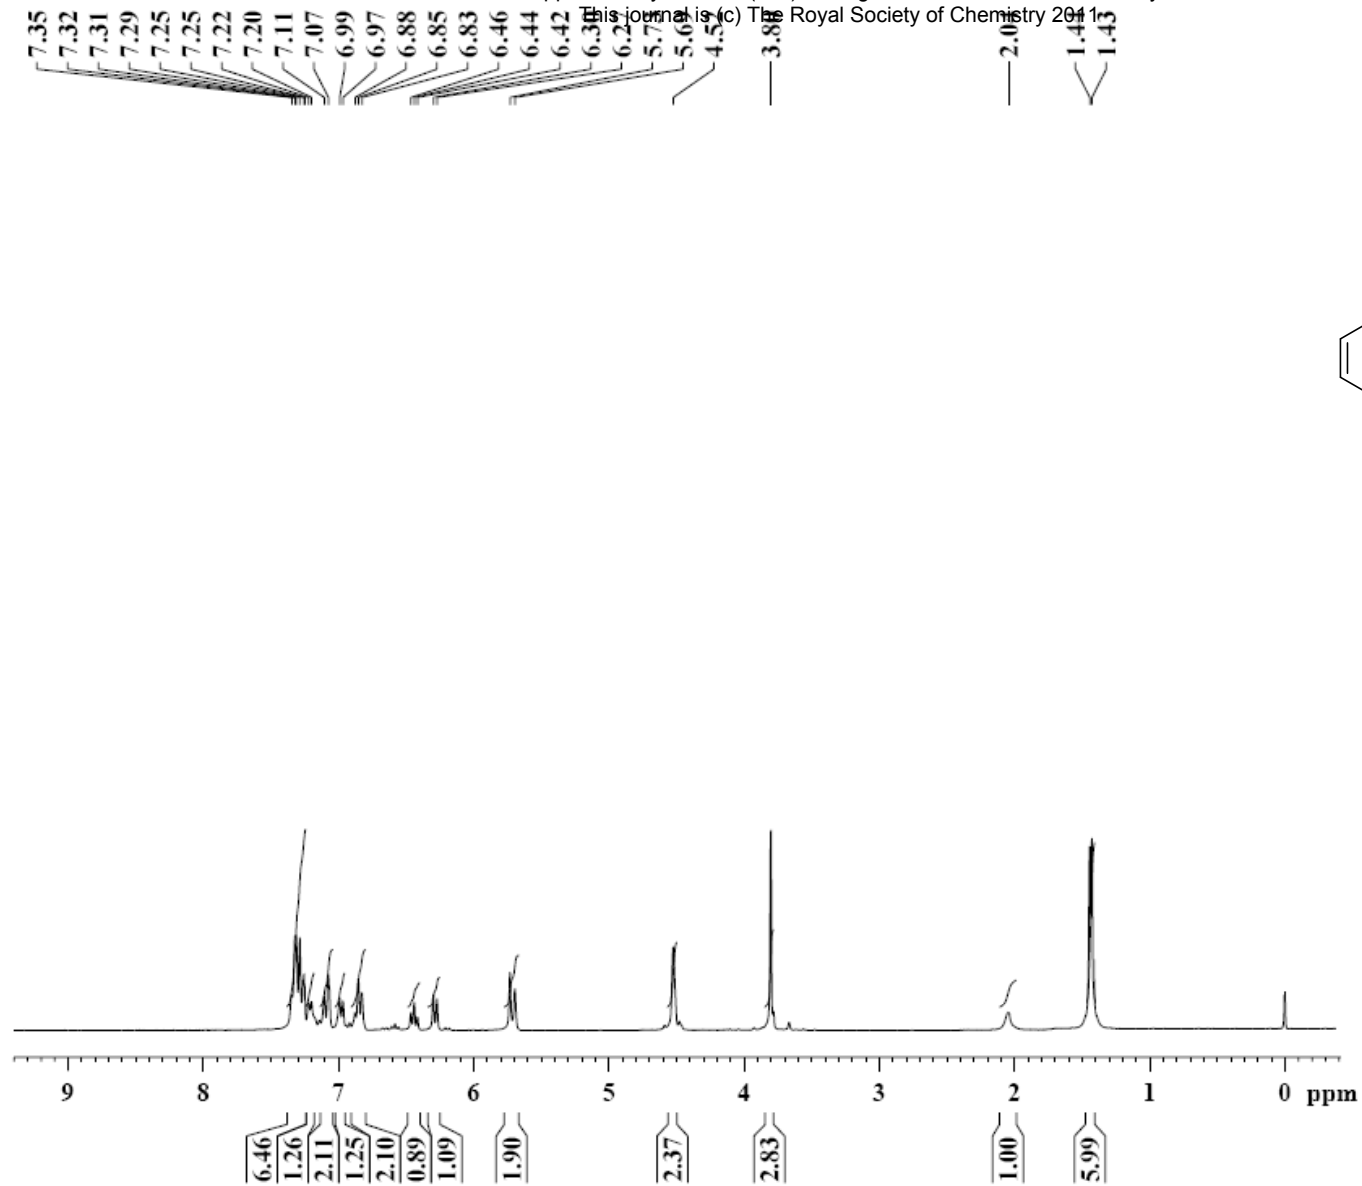

Fig. S-17:  $^1\text{H}$  NMR of (1-benzyl-2,2-dimethyl-1,2-dihydroquinolin-4-yl)(3-methoxyphenyl)methanol (**9**)

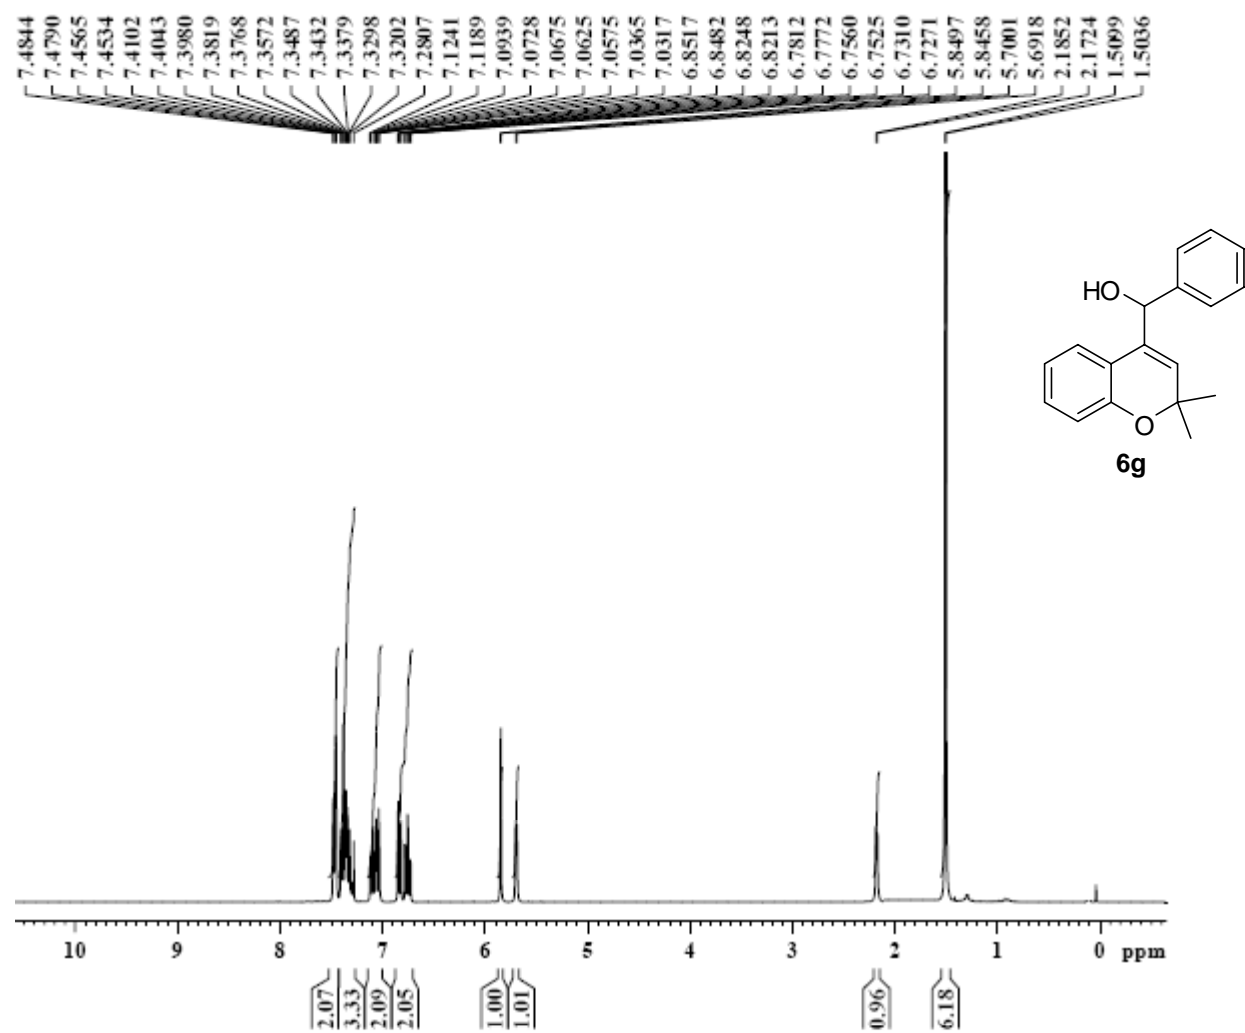

Fig. S-18: <sup>1</sup>H NMR of (2,2-dimethyl-2H-chromen-4-yl)(phenyl)methanol(6g)

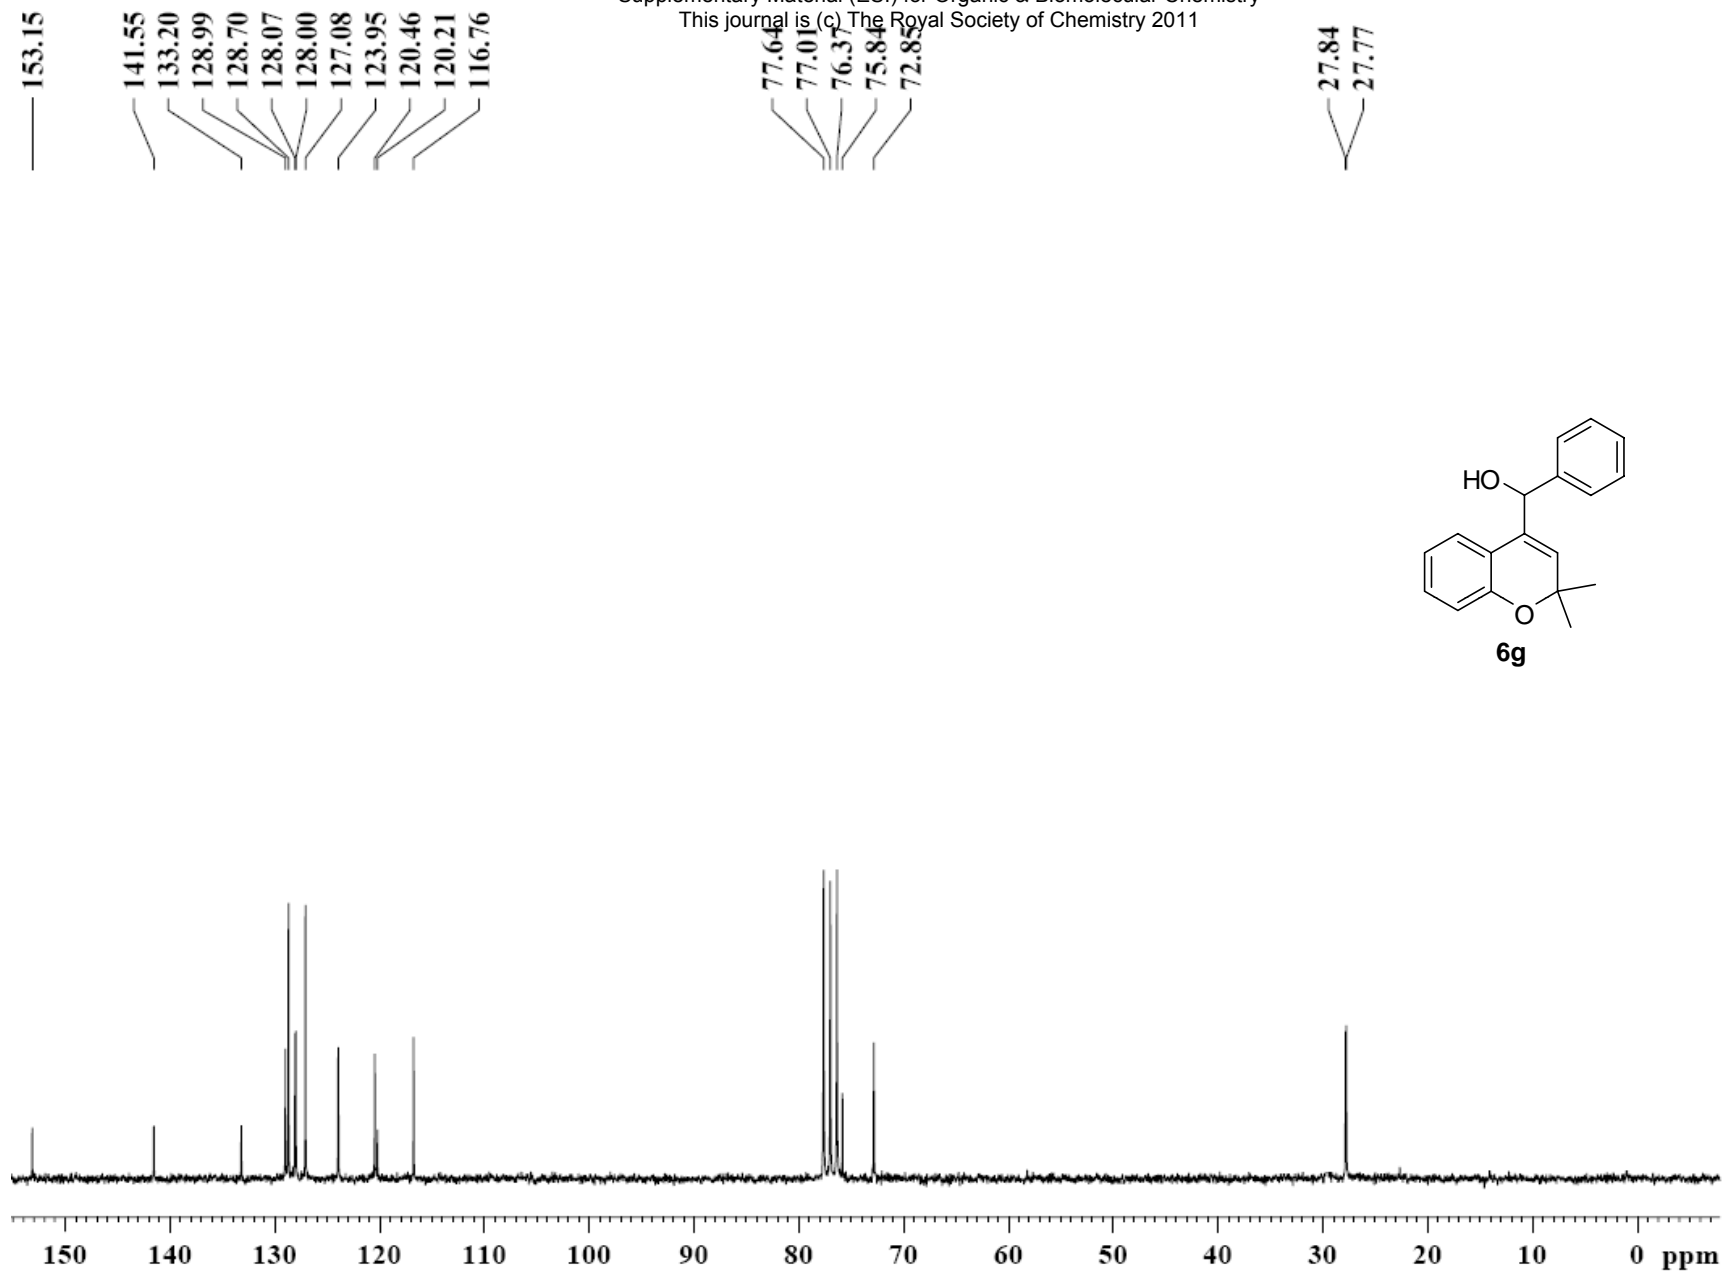

Fig. S-19: <sup>13</sup>C NMR of (2,2-dimethyl-2H-chromen-4-yl)(phenyl)methanol (6g)

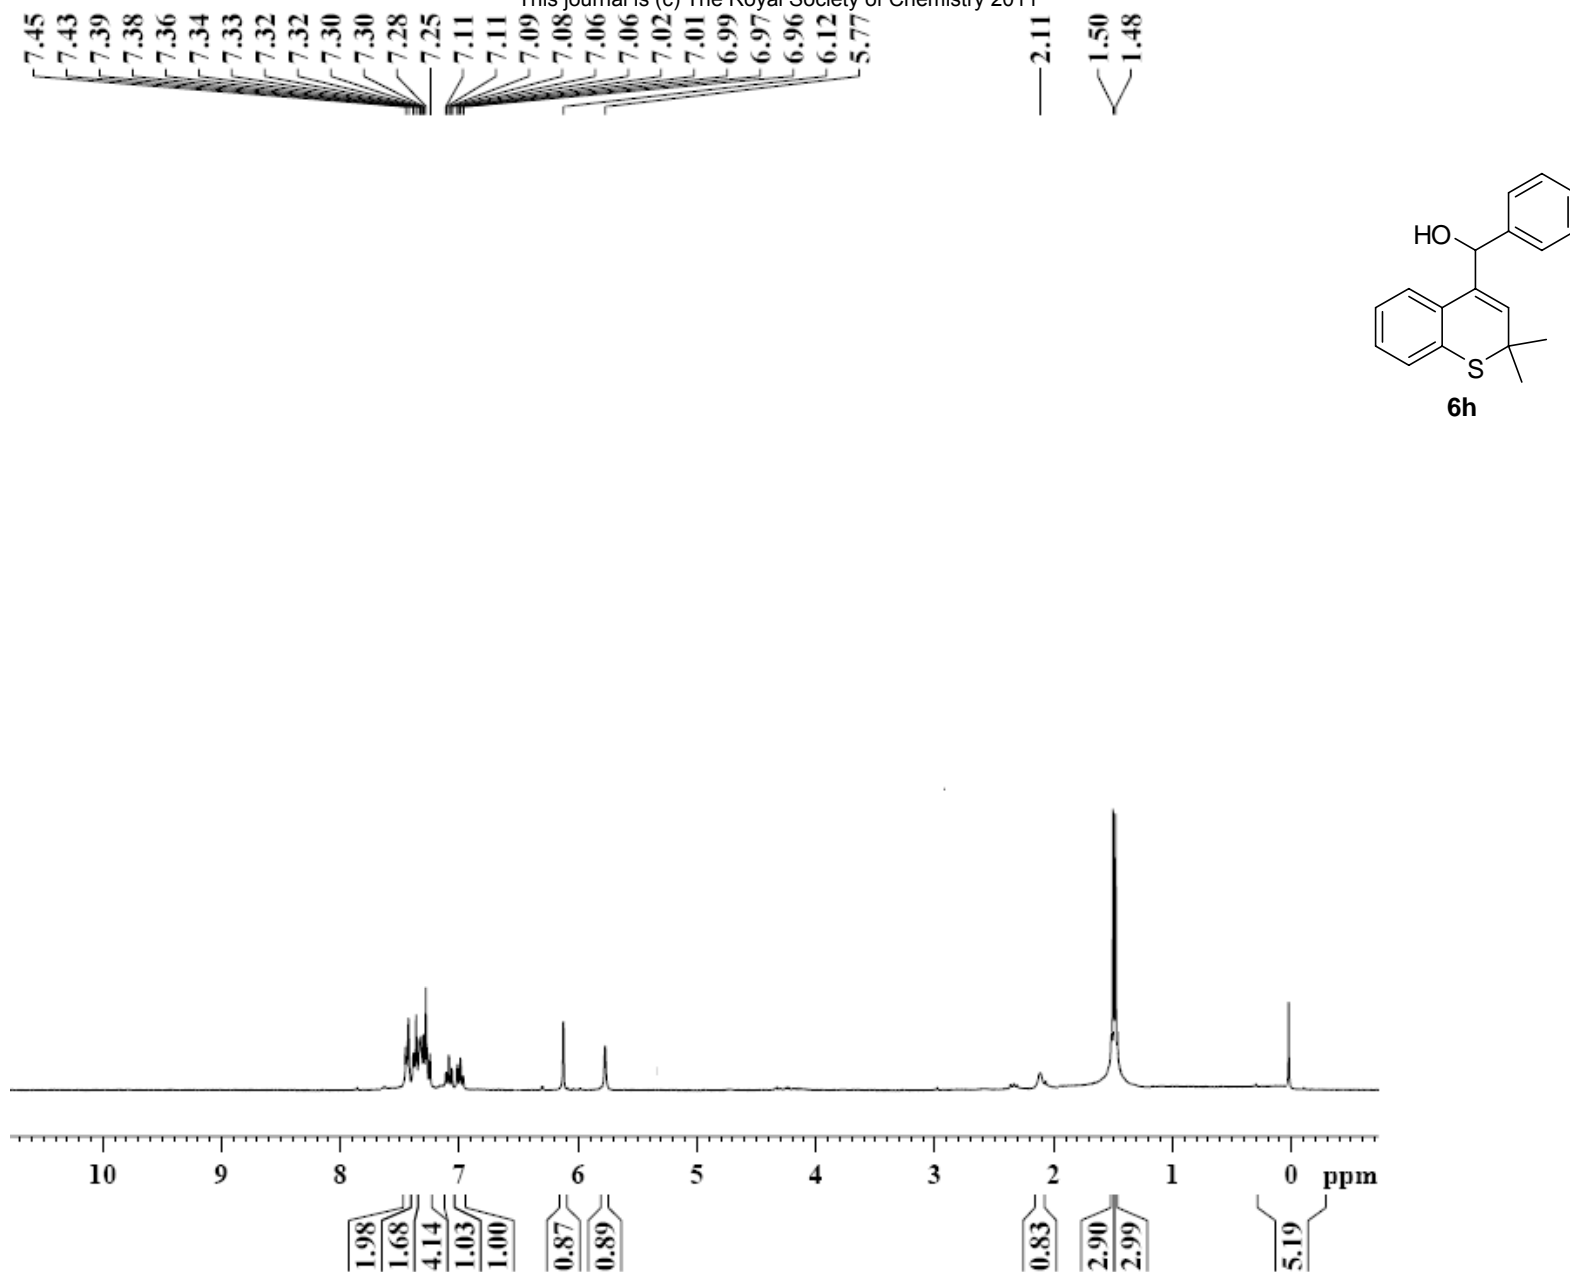

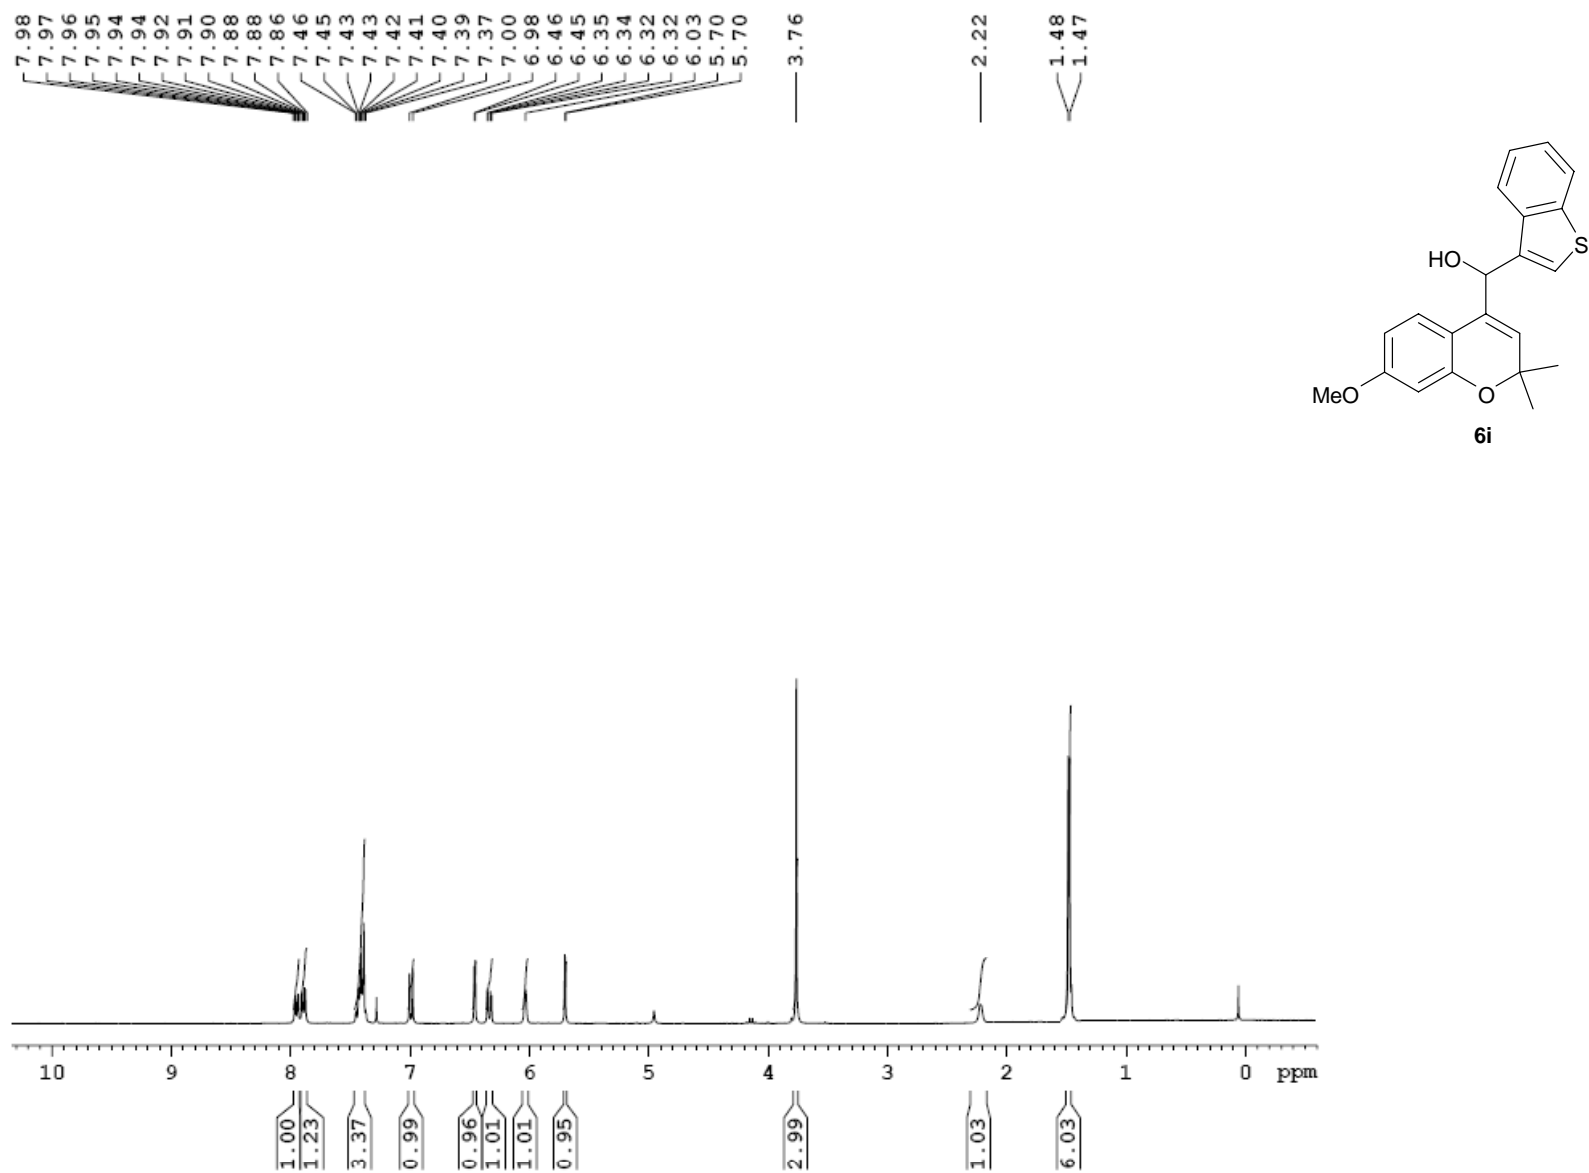

Fig. S-21: <sup>1</sup>H NMR of (benzo[b]thiophen-3-yl(7-methoxy-2,2-dimethyl-2H-chromen-4-yl)methanol ( **6i**)

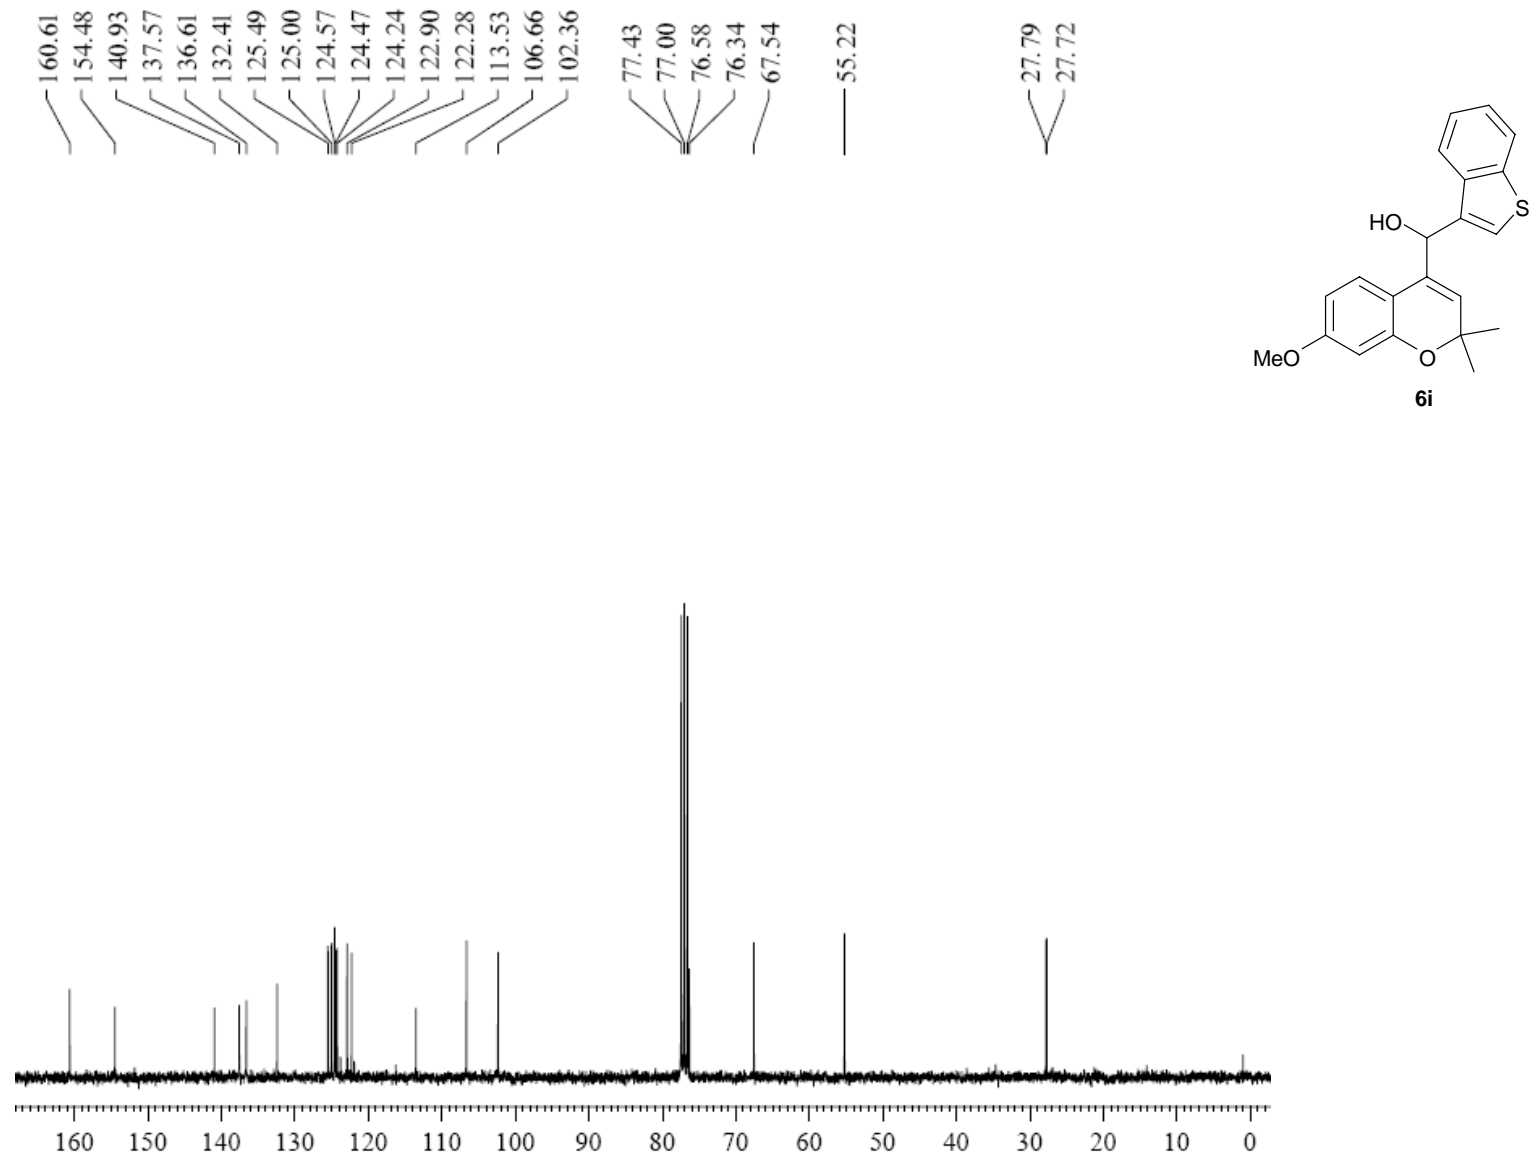

Fig. S-22: <sup>13</sup>C NMR of (benzo[*b*]thiophen-3-yl(7-methoxy-2,2-dimethyl-2H-chromen-4-yl)methanol ( **6i**)

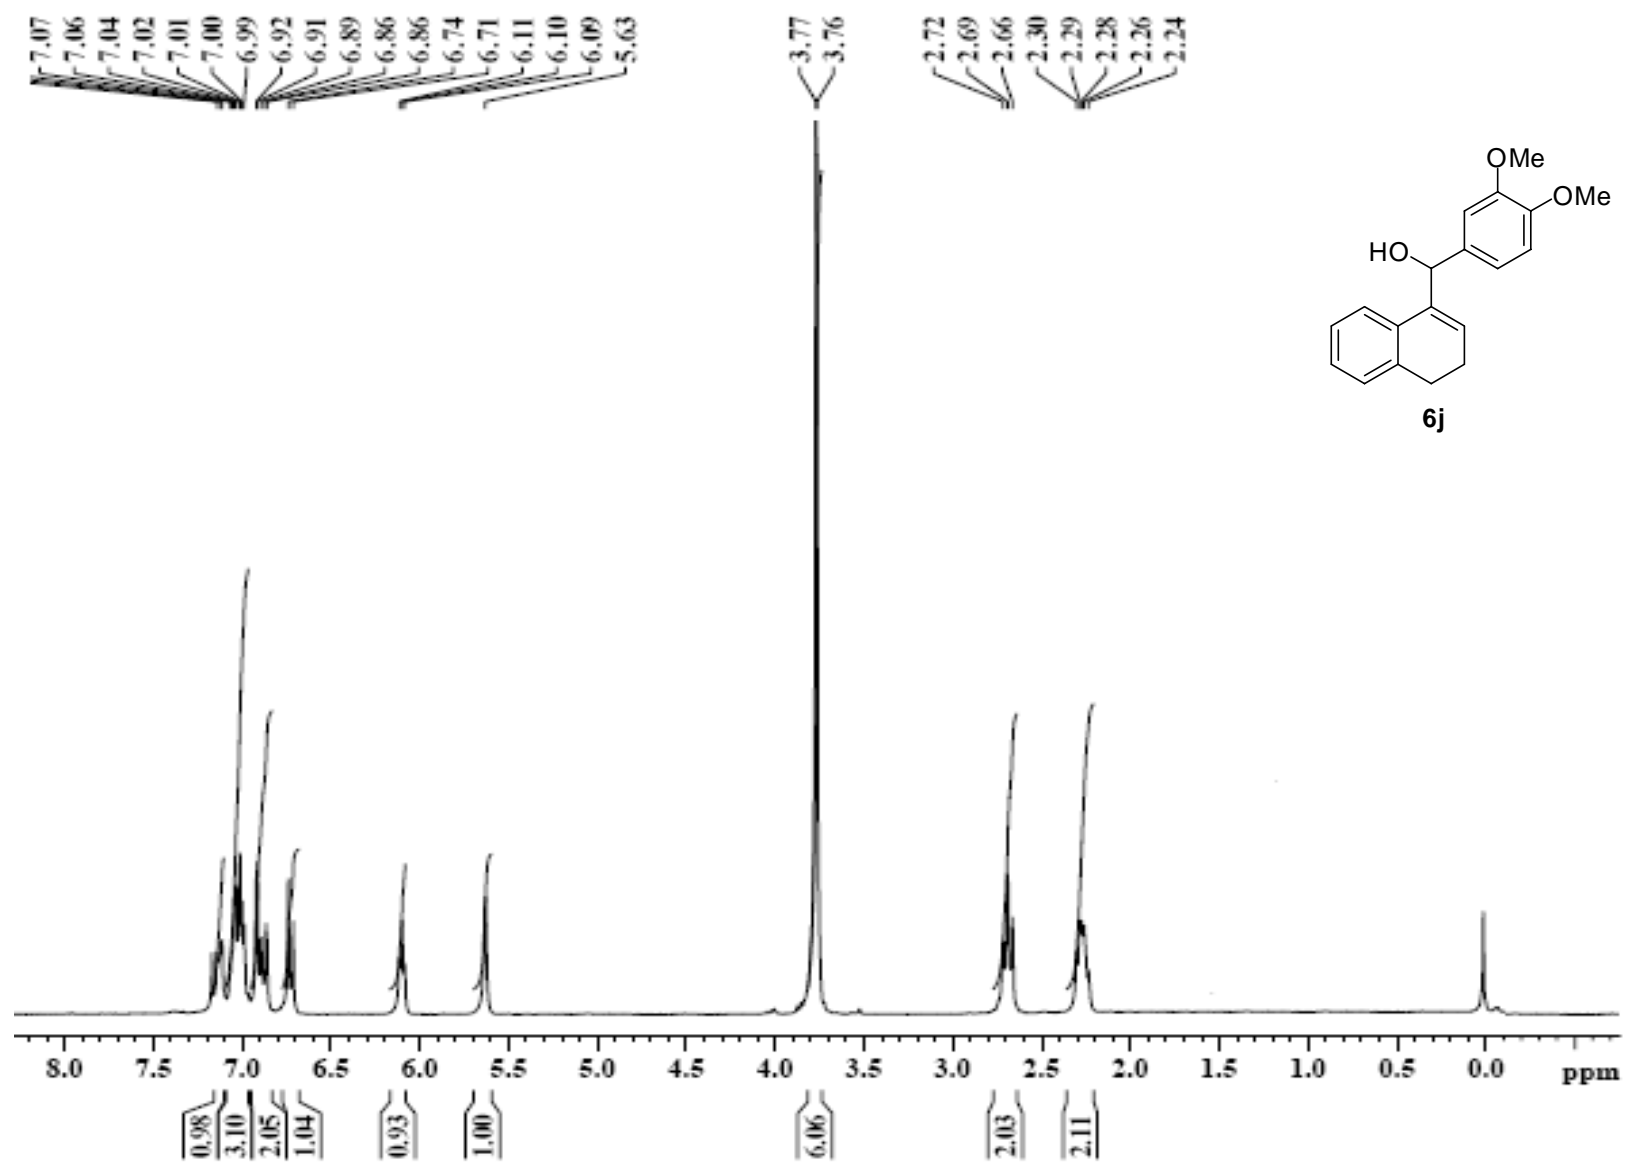

Fig. S-23: <sup>1</sup>H NMR of (3,4-dihydronaphthalen-1-yl)(3,4-dimethoxyphenyl)methanol ( 6j)



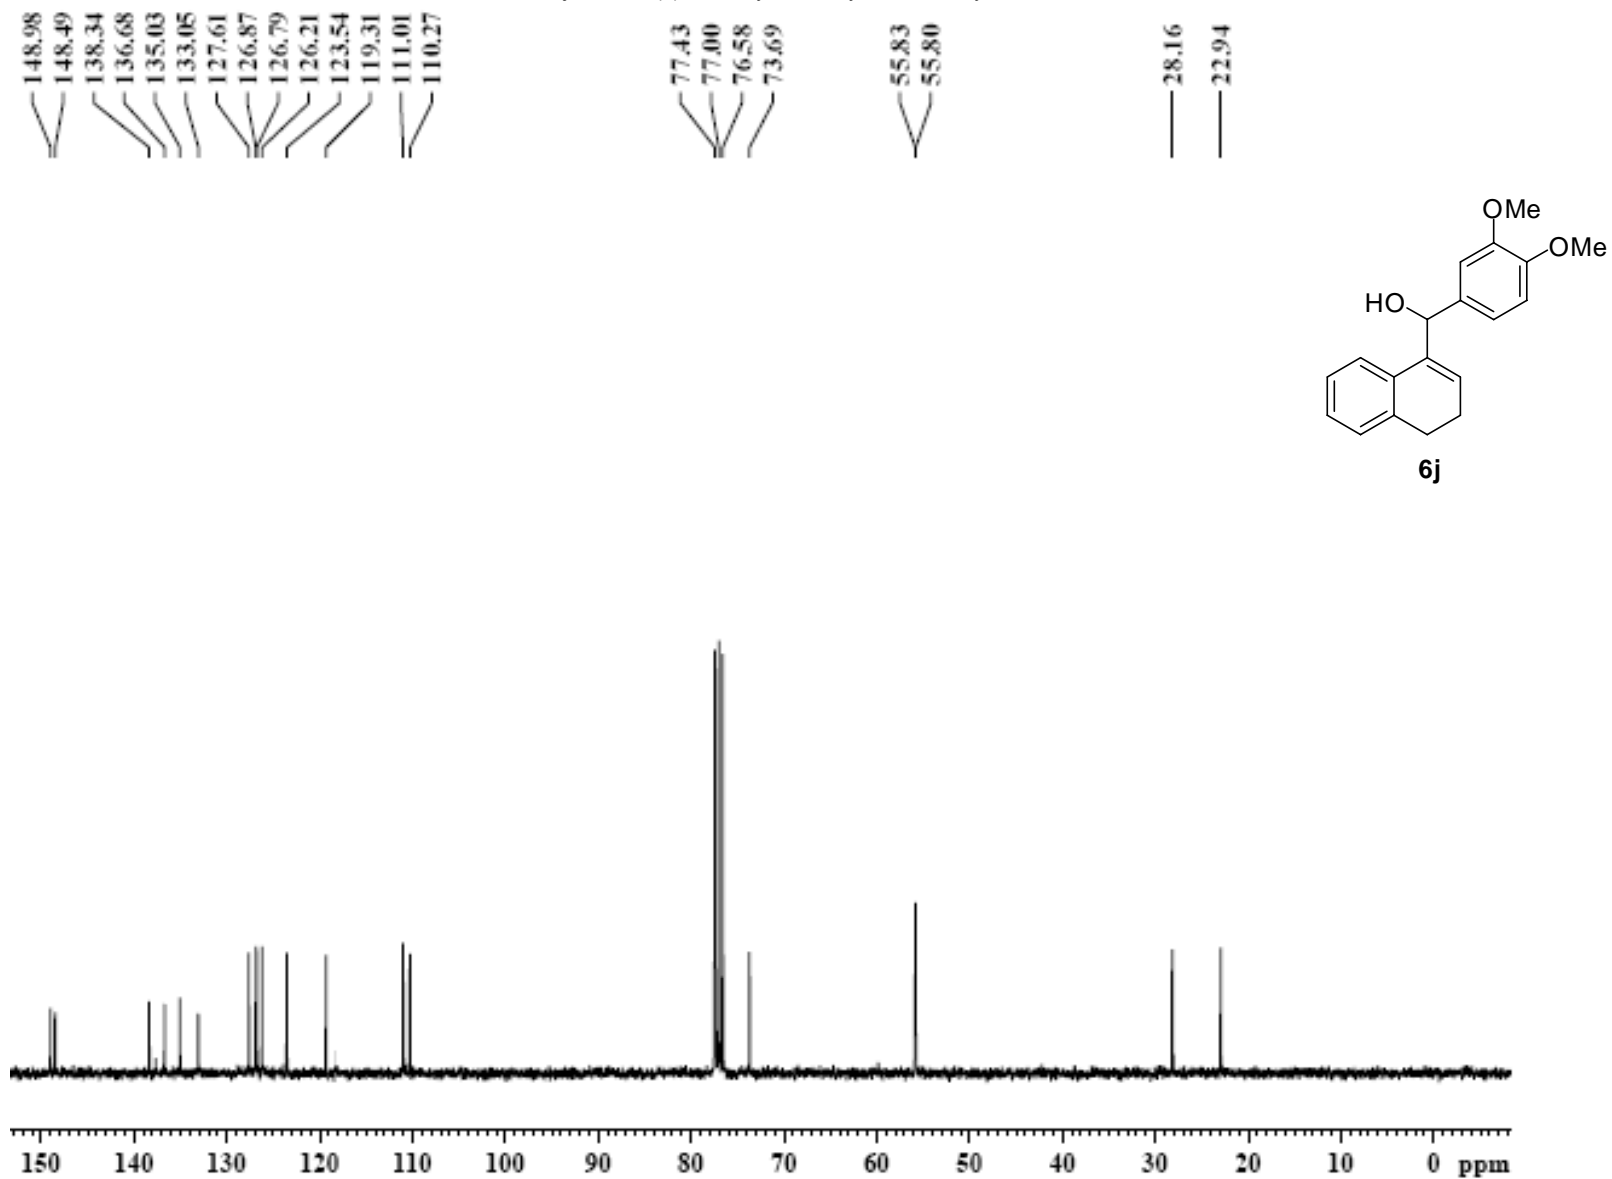

Fig. S-24:  $^{13}\text{C}$  NMR of (3,4-dihydronaphthalen-1-yl)(3,4-dimethoxyphenyl)methanol ( **6j** )

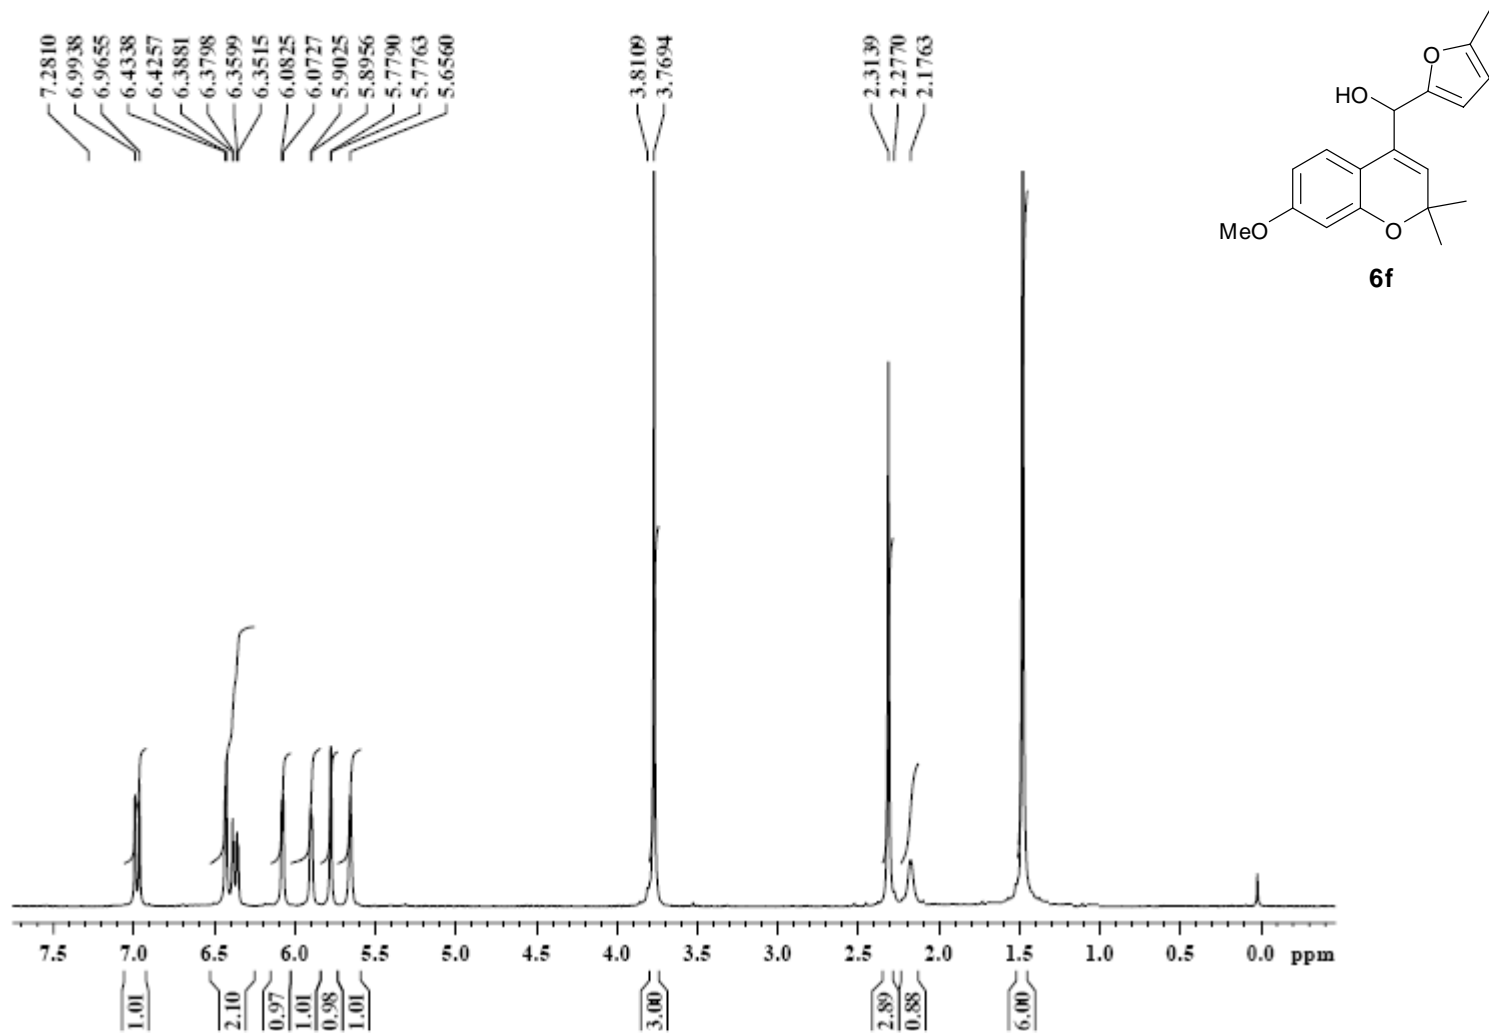

Fig. S-25: <sup>1</sup>H NMR of (7-methoxy-2,2-dimethyl-2H-chromen-4-yl)(5-methylfuran-2-yl)methanol (**6f**)

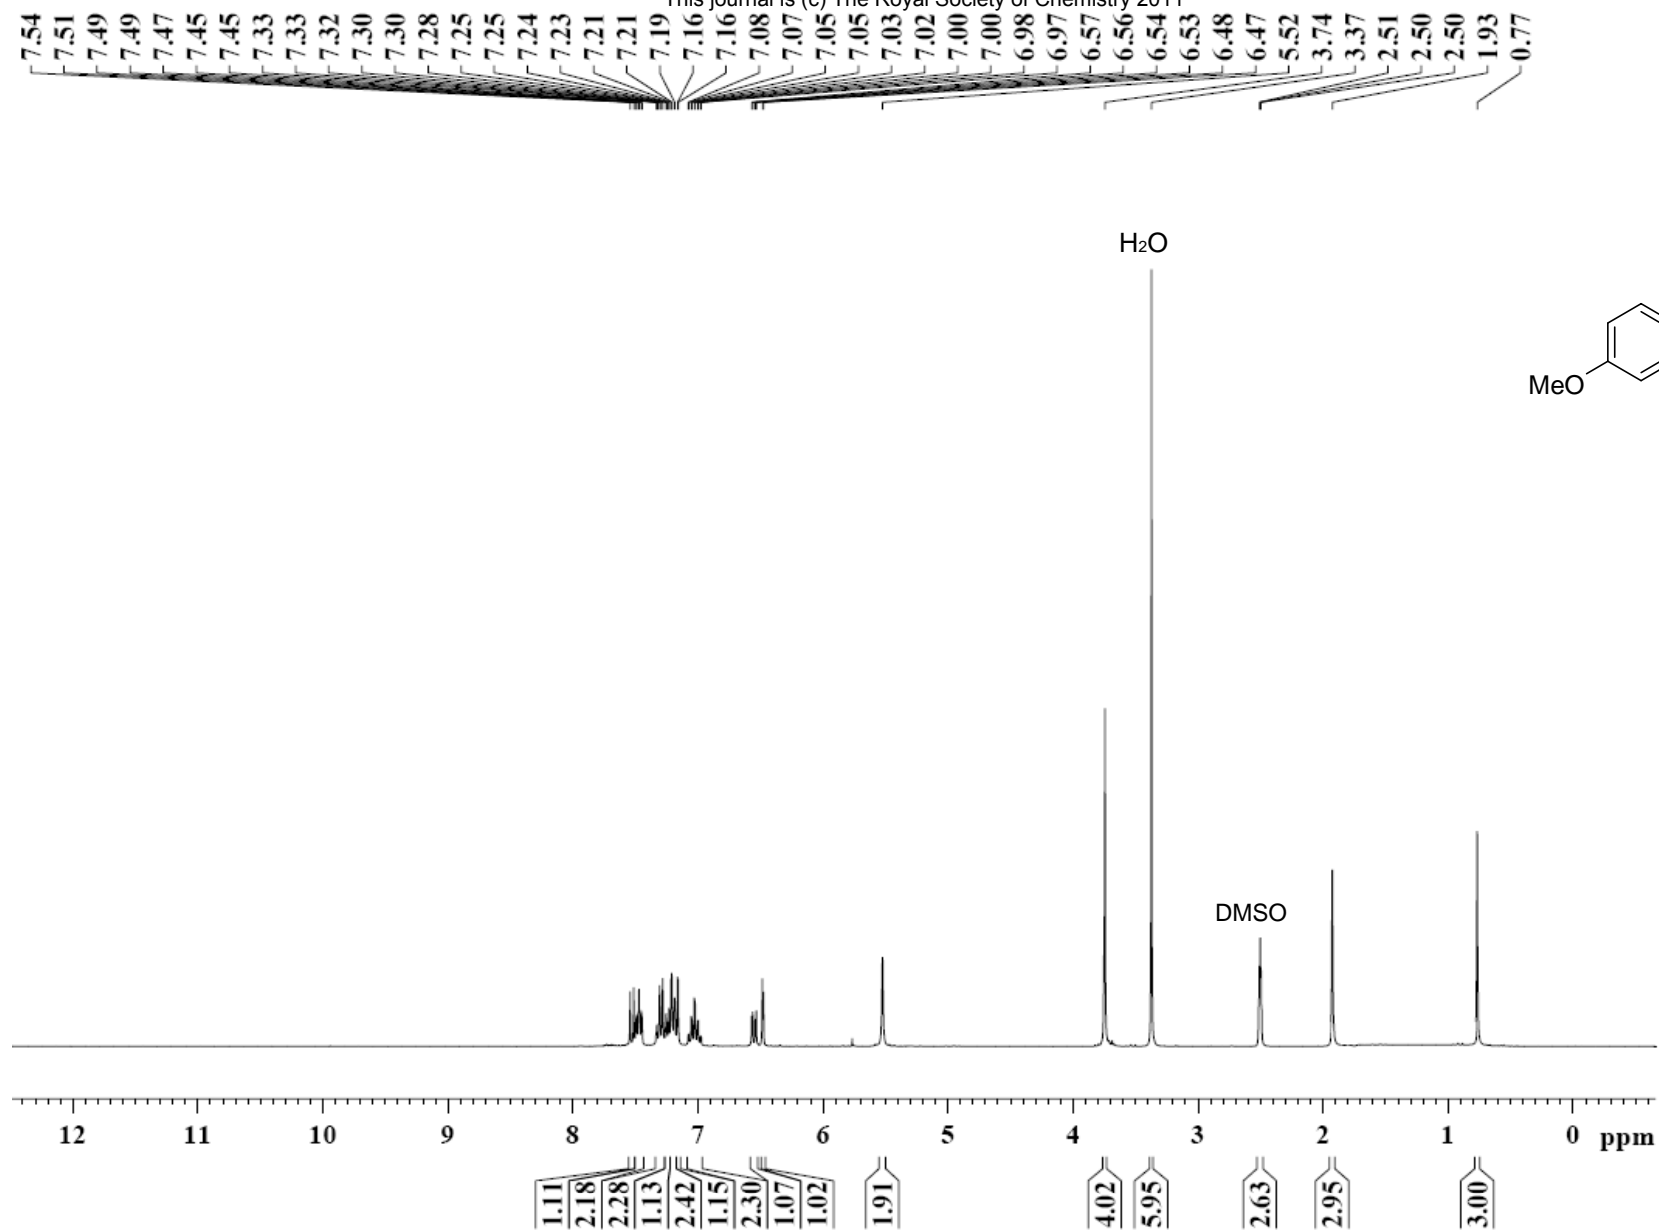

Fig. S-26: <sup>1</sup>H NMR of 11-Benzyl-3-methoxy-6,6-dimethyl-6a,11-dihydro-6H-5-oxa-11-aza-benzo[5,6]pentaleno[2,1-b]naphthalene (10a)

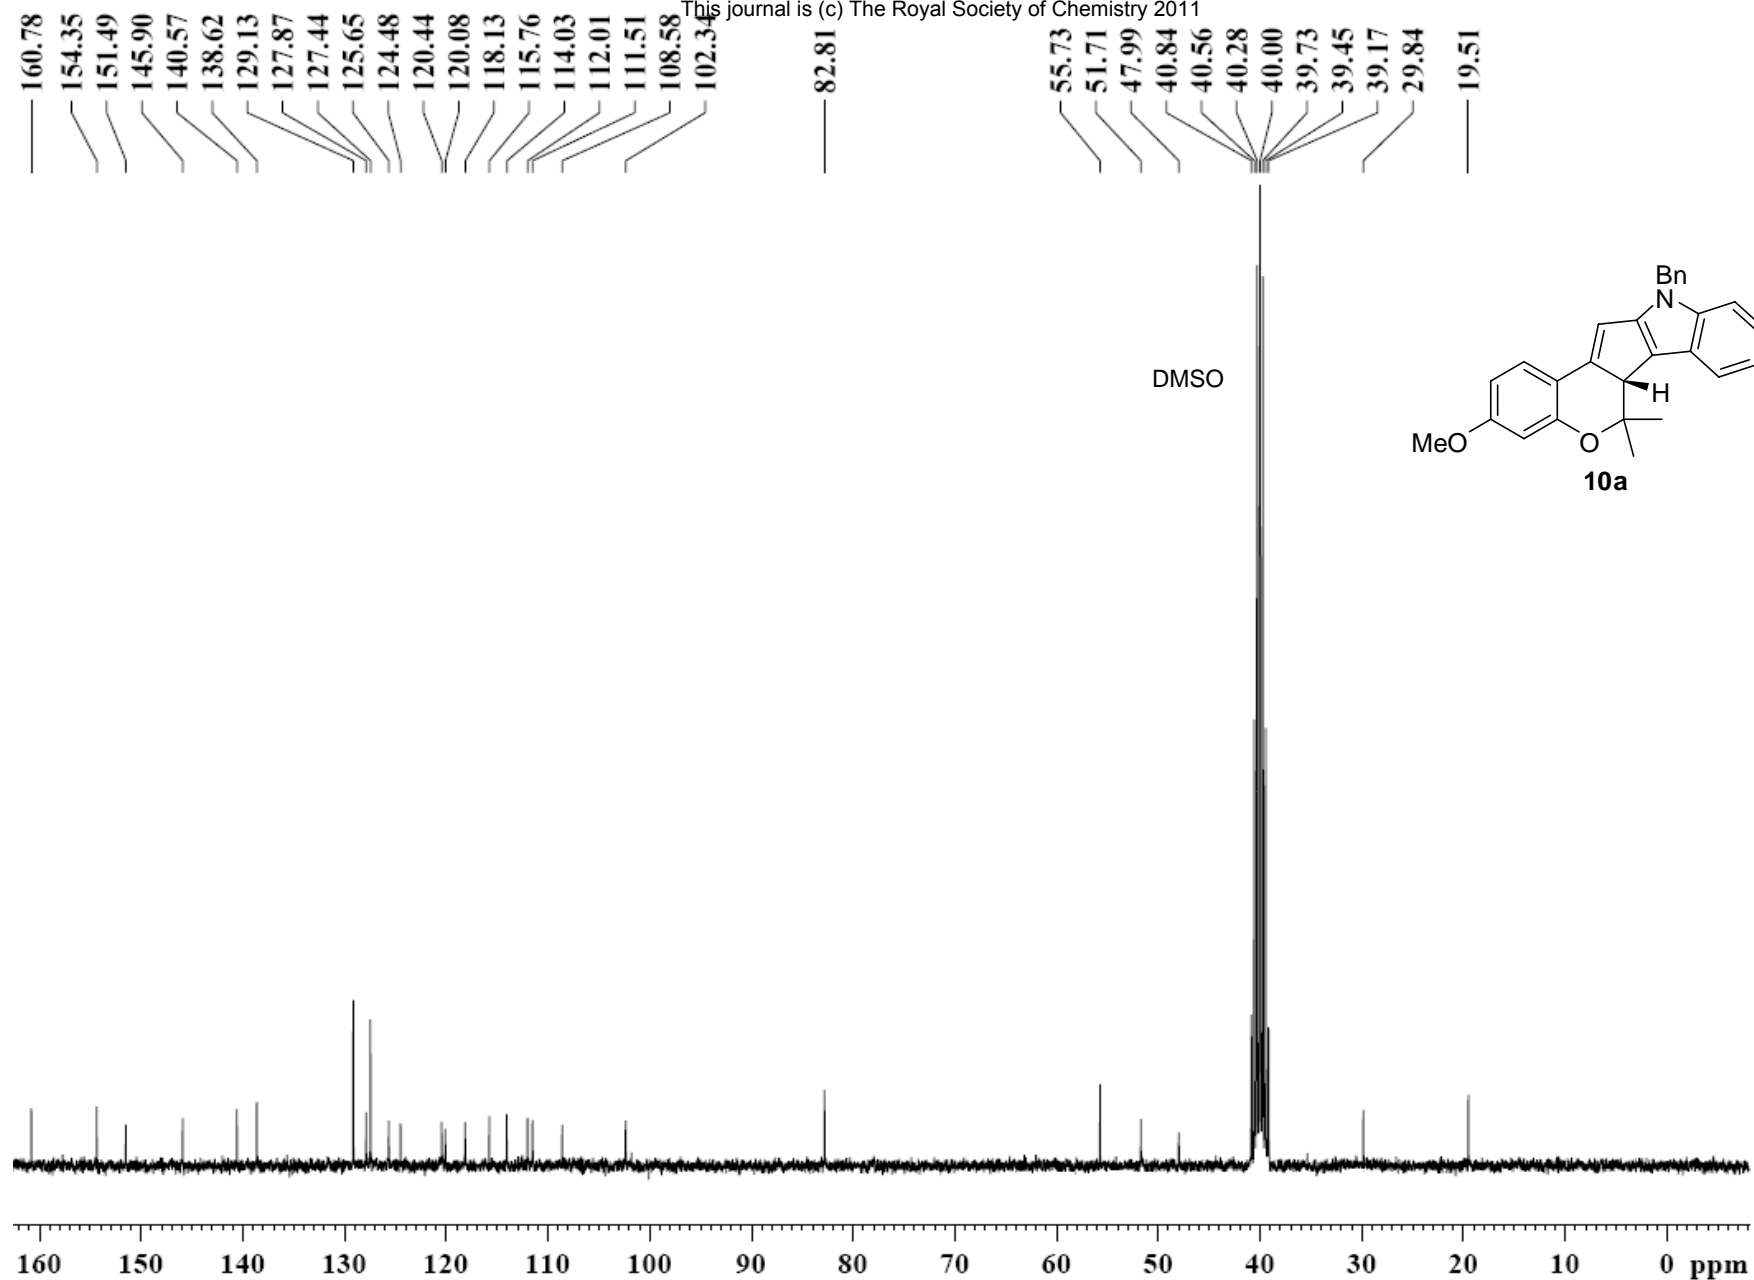

Fig. S-27:  $^{13}\text{C}$  NMR of 11-Benzyl-3-methoxy-6,6-dimethyl-6a,11-dihydro-6H-5-oxa-11-aza-benzo[5,6]pentaleno[2,1-b]naphthalene (10a)

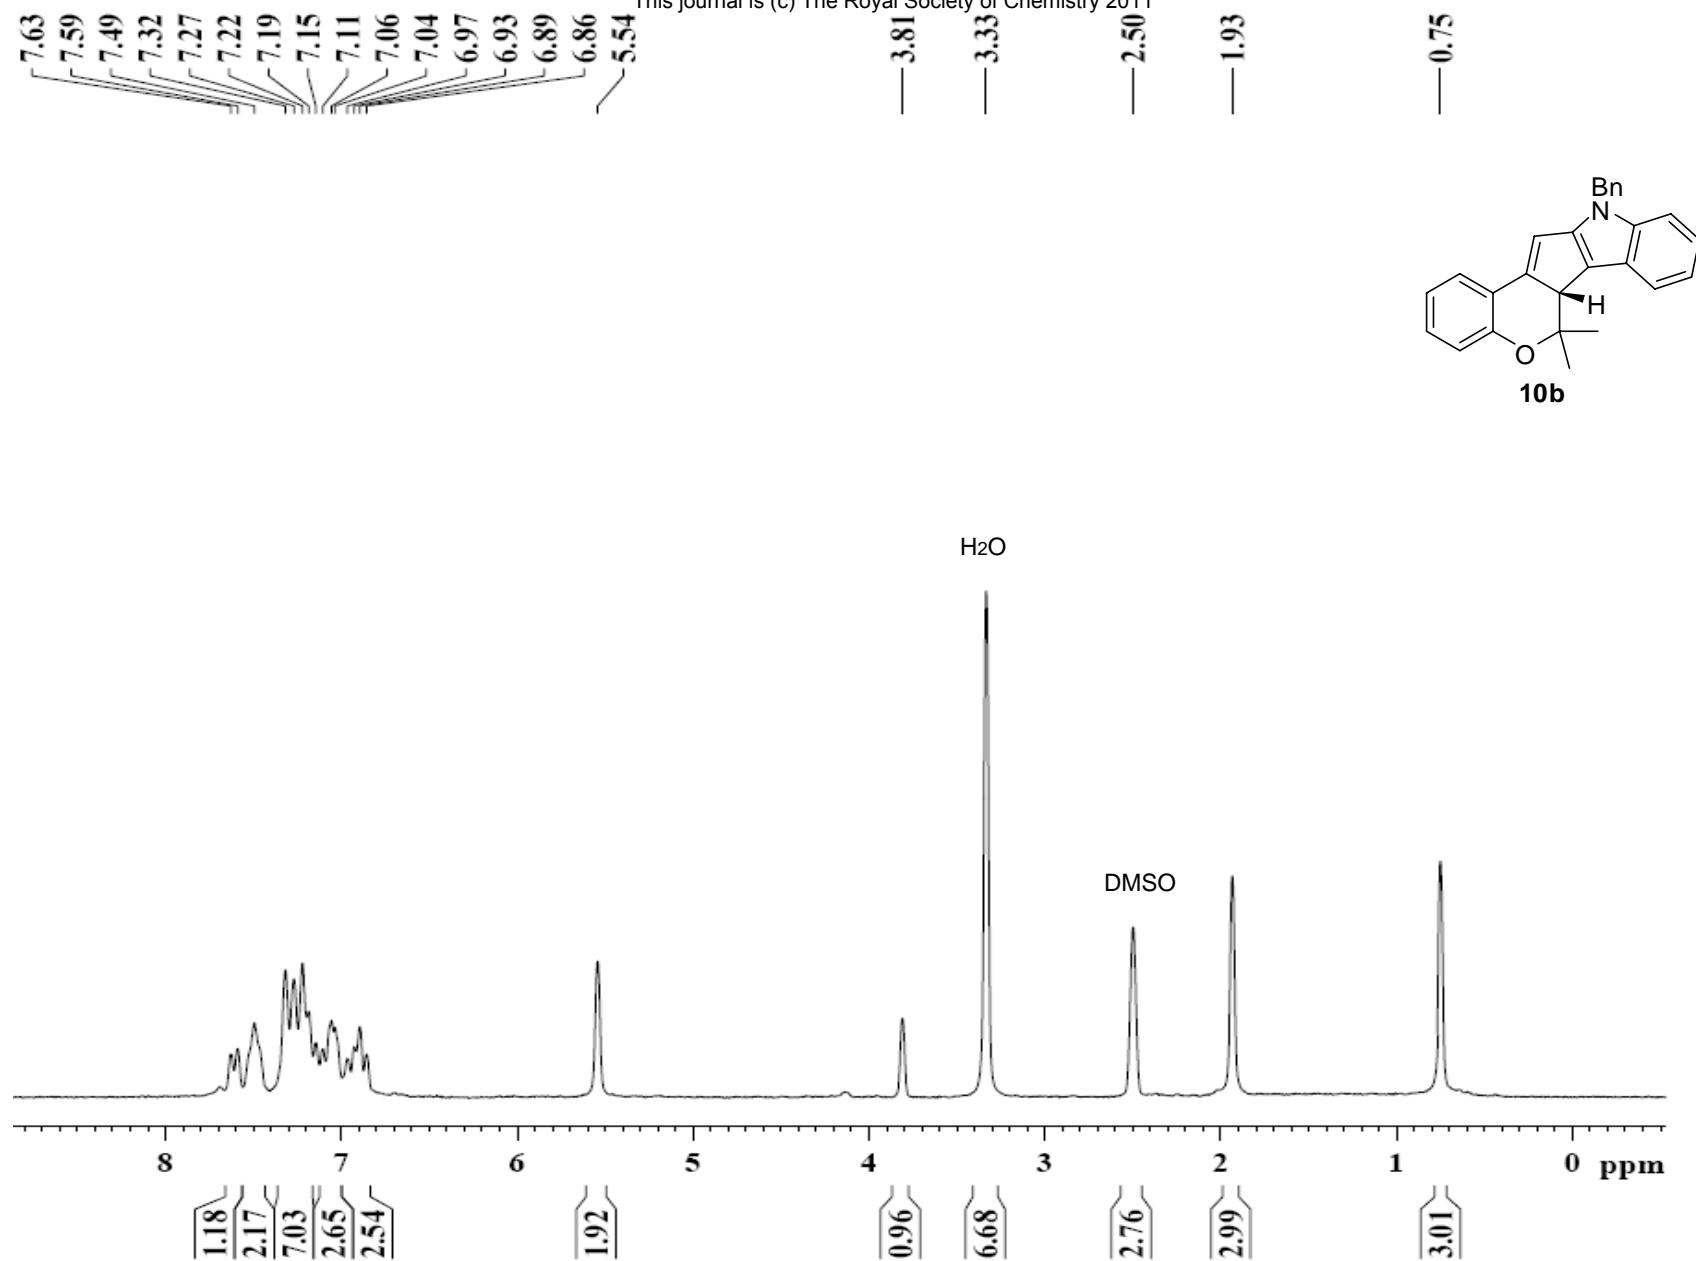

Fig. S-28: <sup>1</sup>H NMR of 11-Benzyl-6,6-dimethyl-6a,11-dihydro-6H-5-oxa-11-aza-benzo[5,6]pentaleno[2,1-b]naphthalene (10b)

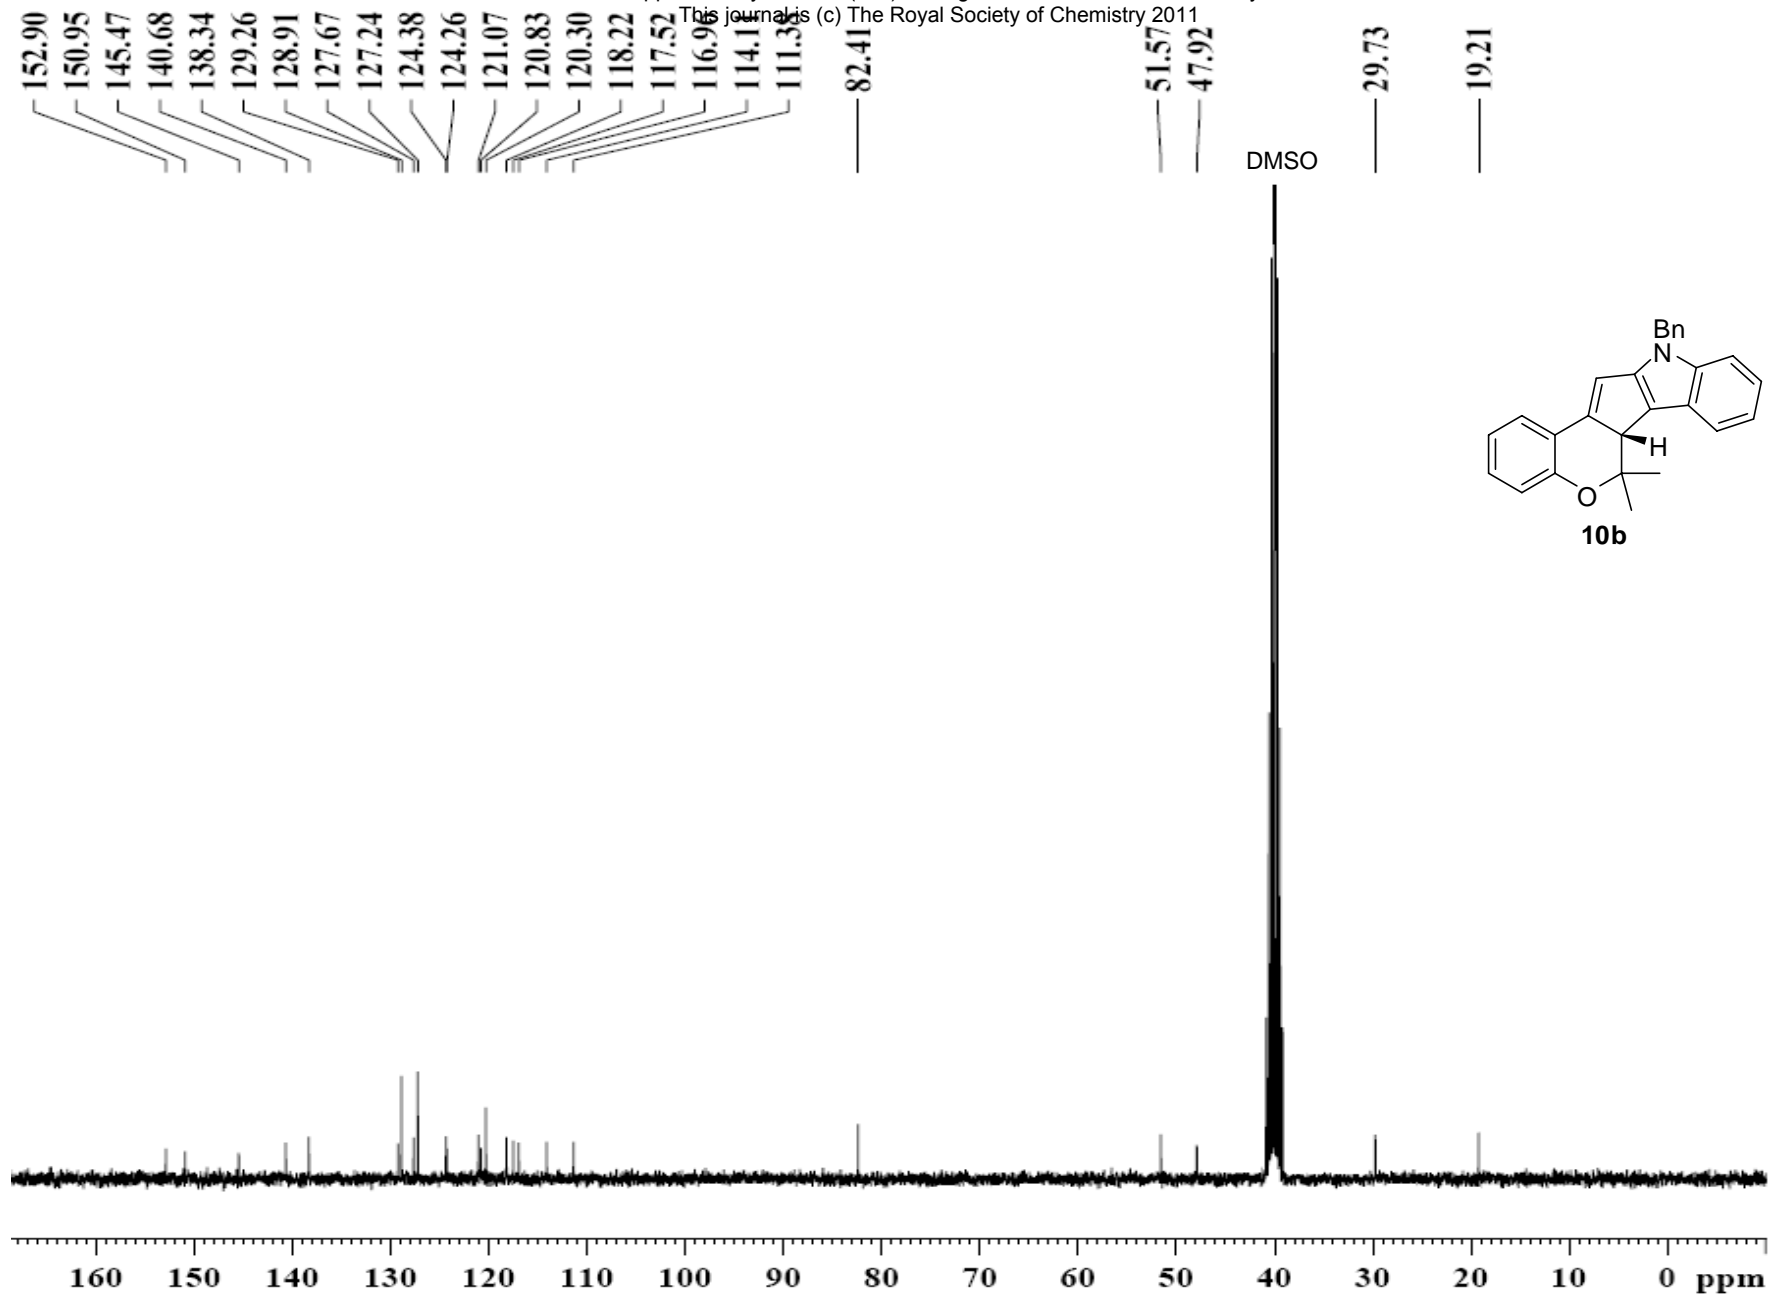

Fig. S-29: <sup>13</sup>C NMR of 11-Benzyl-6,6-dimethyl-6a,11-dihydro-6H-5-oxa-11-aza-benzo[5,6]pentaleno[2,1-b]naphthalene (10b)<sup>30</sup>

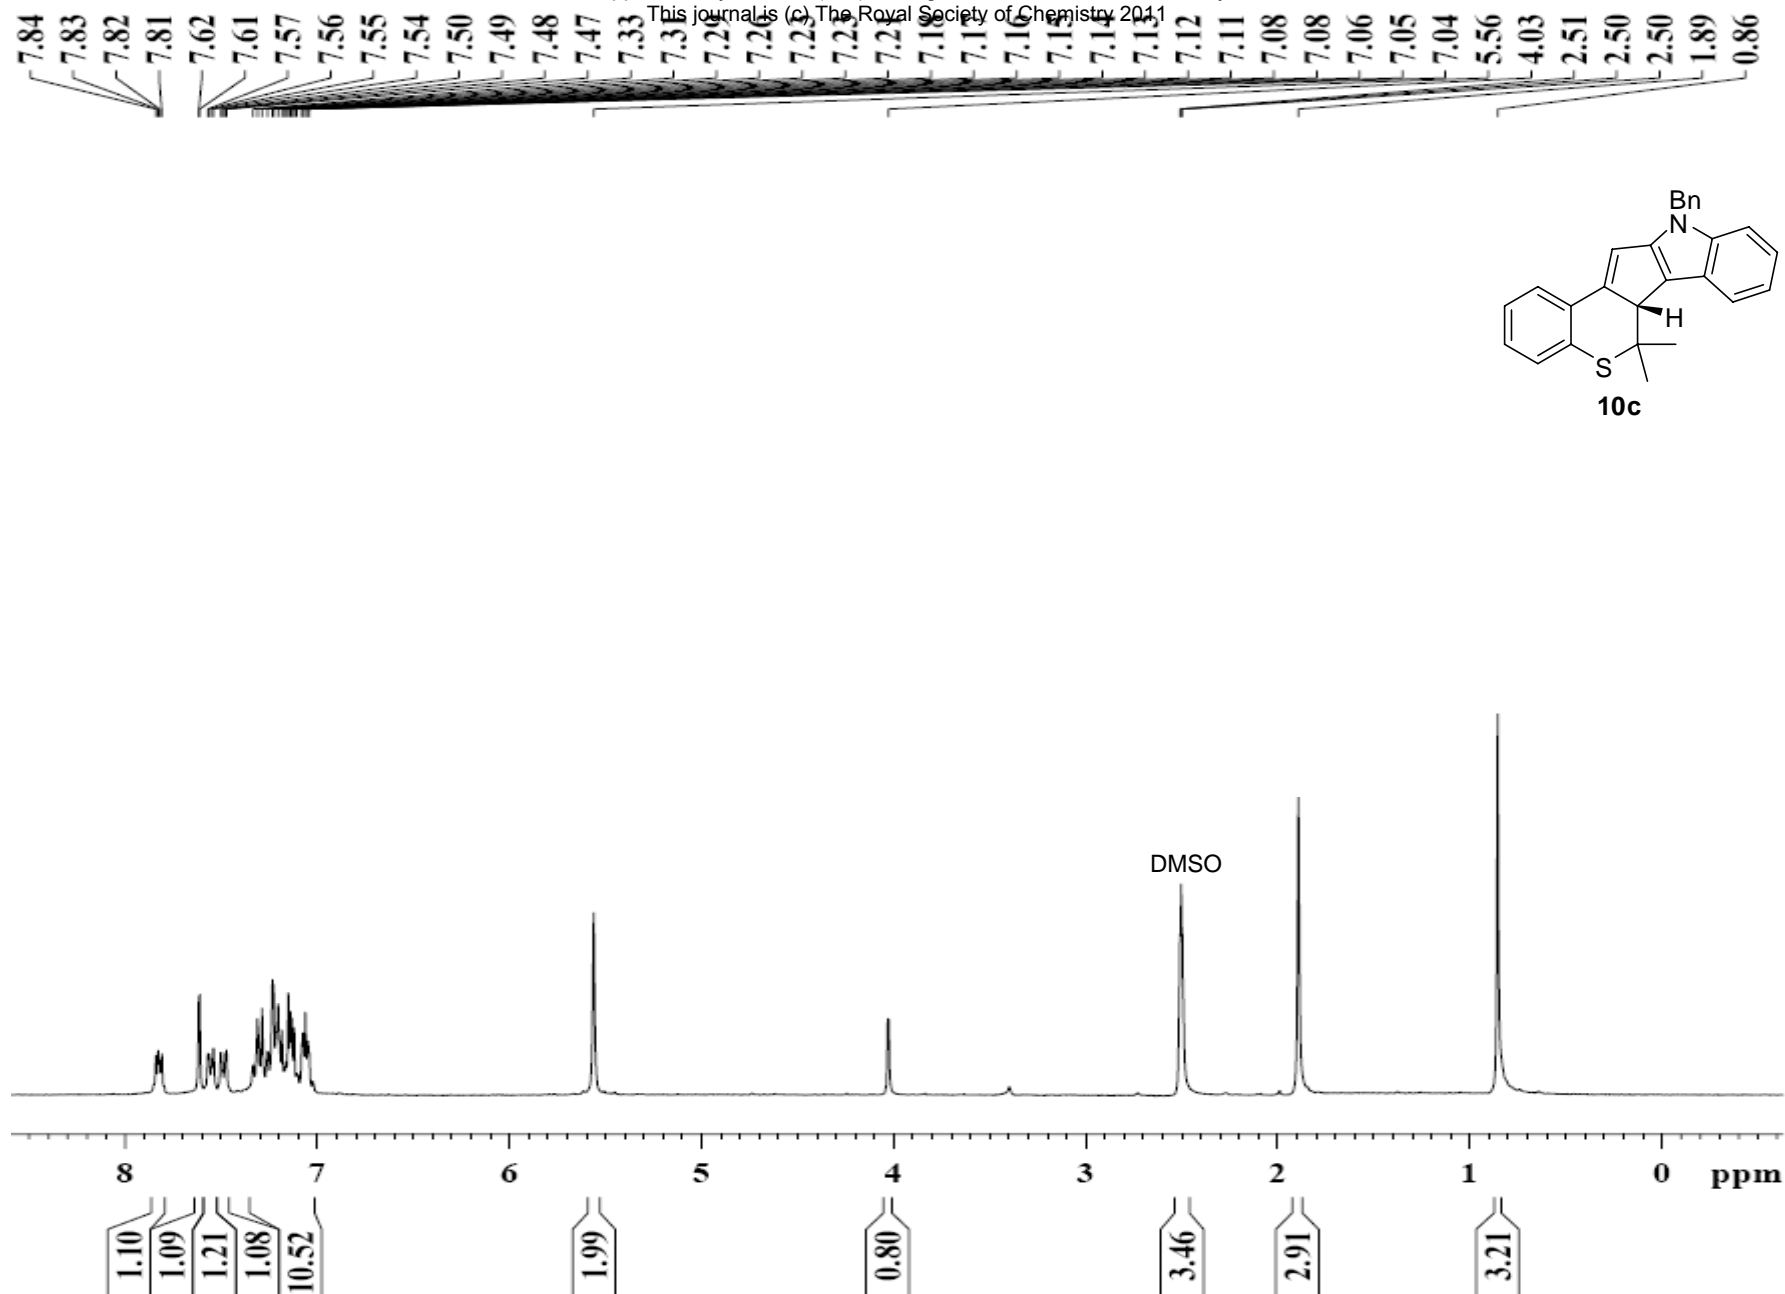

Fig. S-30:  $^1\text{H}$  NMR of 11-benzyl-6,6-dimethyl-6a,11-dihydro-6H-5-thia-11-aza-benzo[5,6]pentaleno[2,1-b]naphthalene (**10c**)

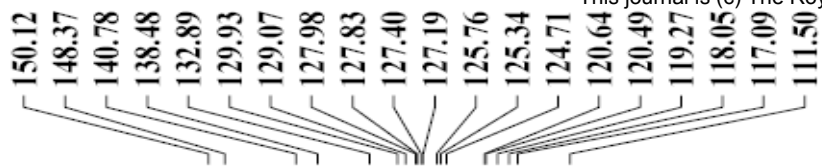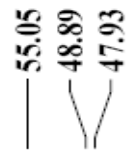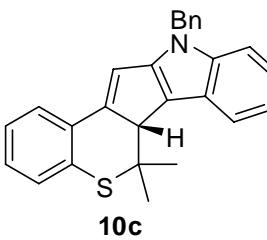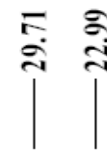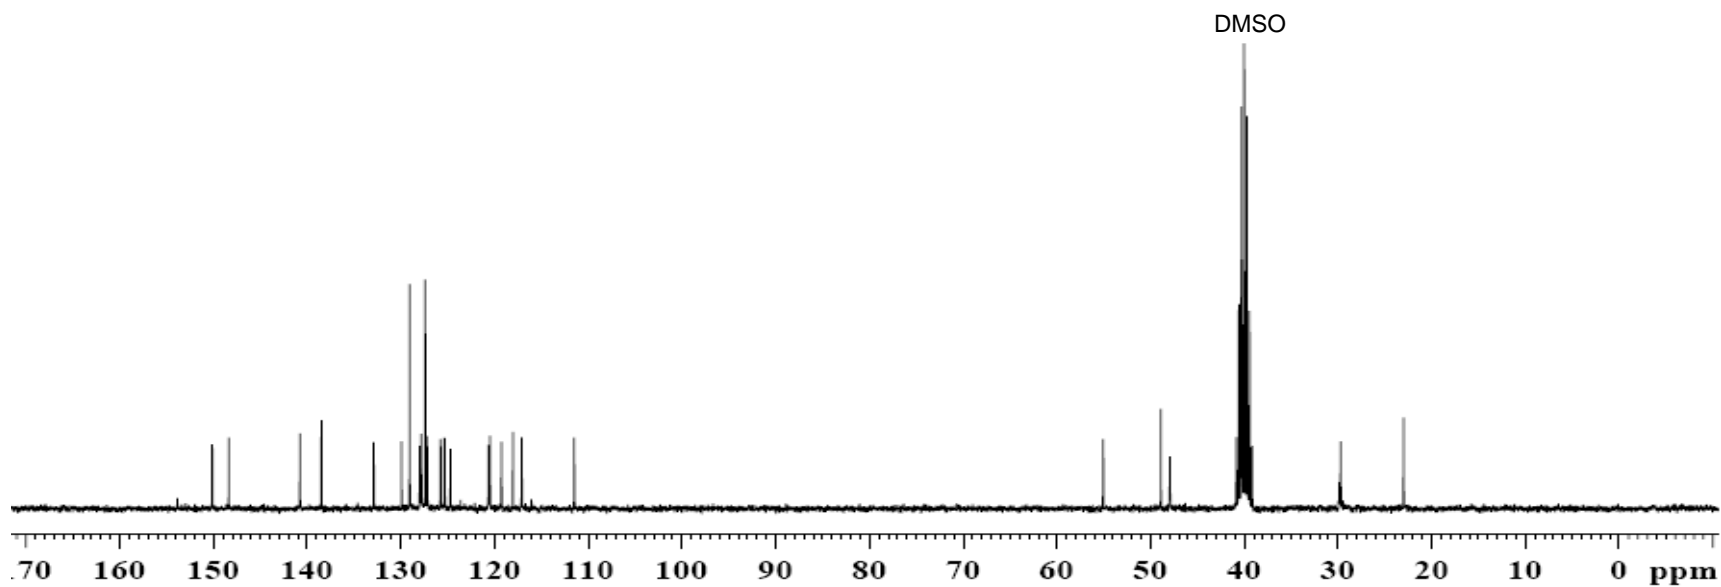

Fig. S-31:  $^{13}\text{C}$  NMR of 11-benzyl-6,6-dimethyl-6a,11-dihydro-6H-5-thia-11-aza-benzo[5,6]pentaleno[2,1-b]naphthalene(10c)<sub>32</sub>



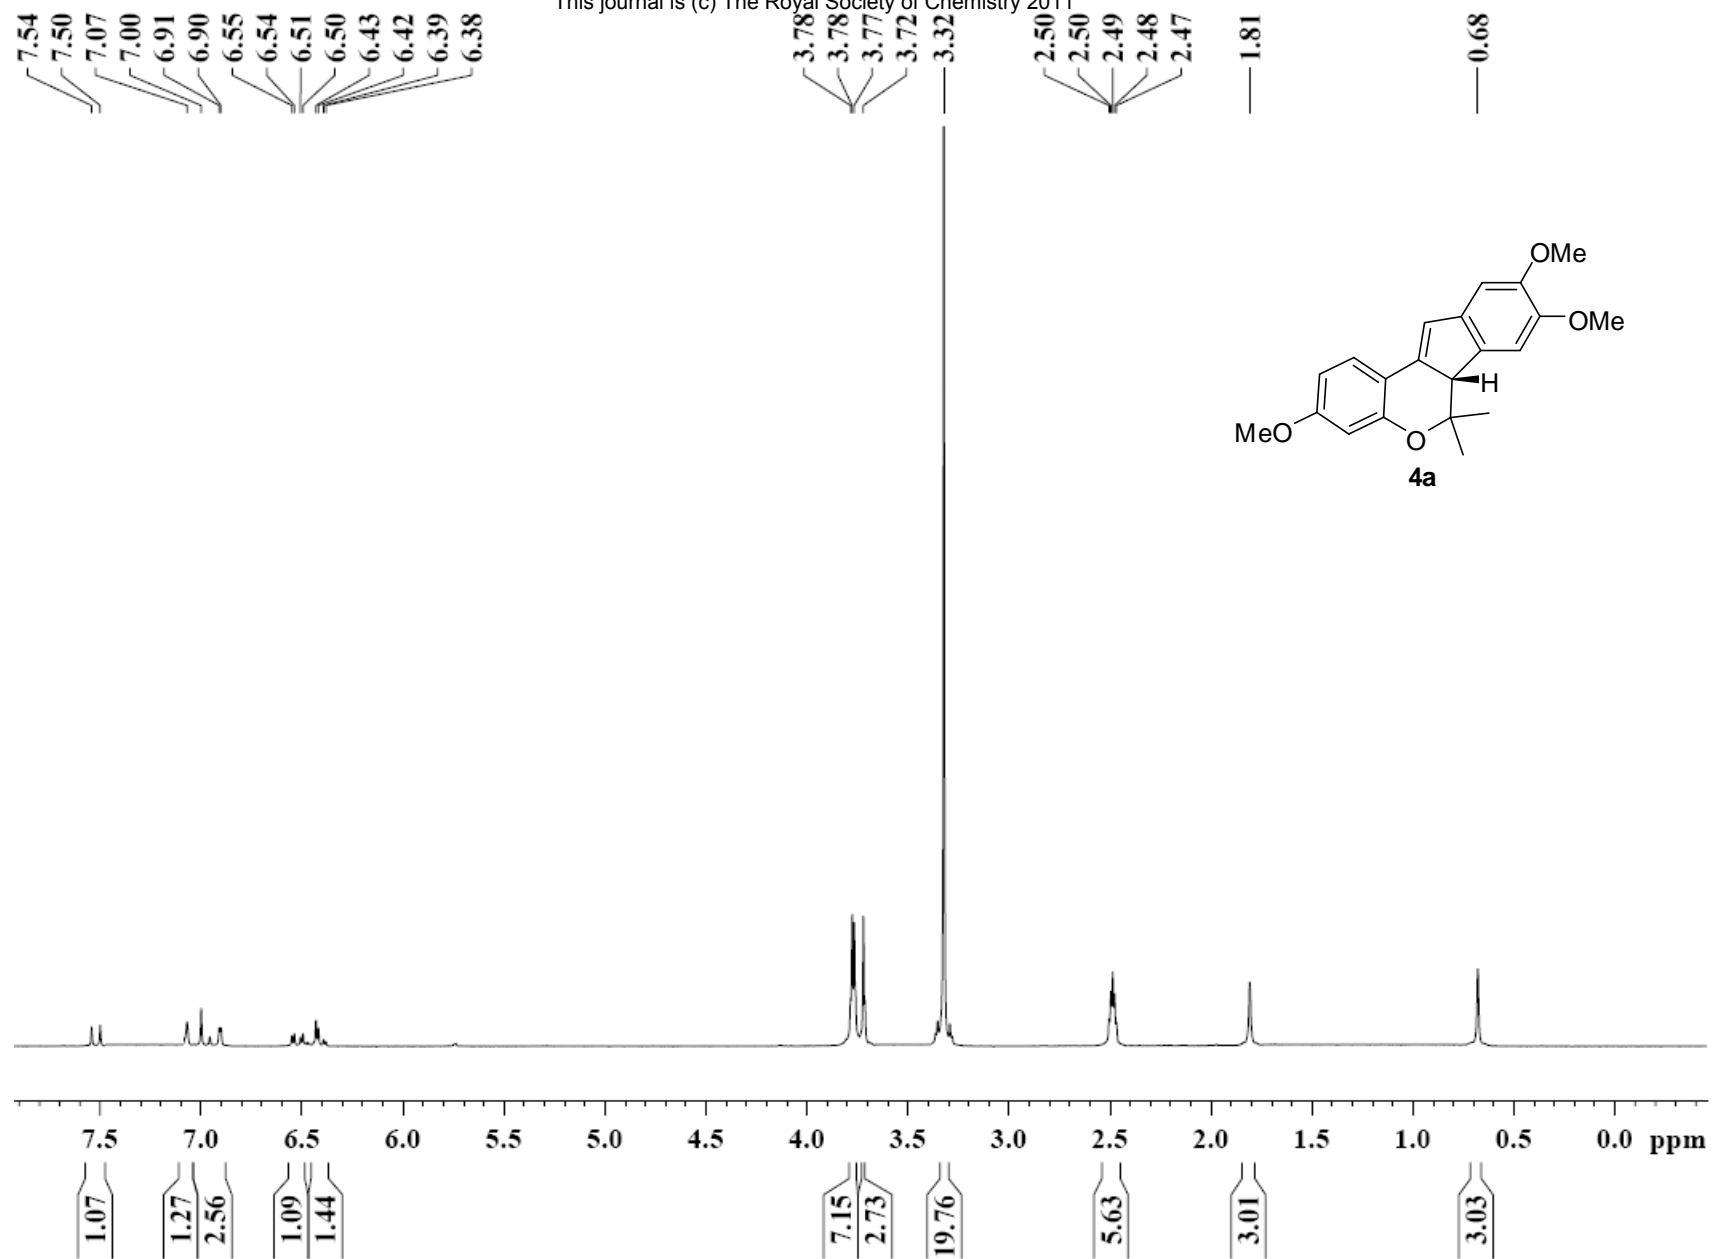

Fig. S-32:  $^1\text{H}$  NMR of 3,8,9-trimethoxy-6,6-dimethyl-6,6a-dihydroindeno[1,2-c]chromene (**4a**)

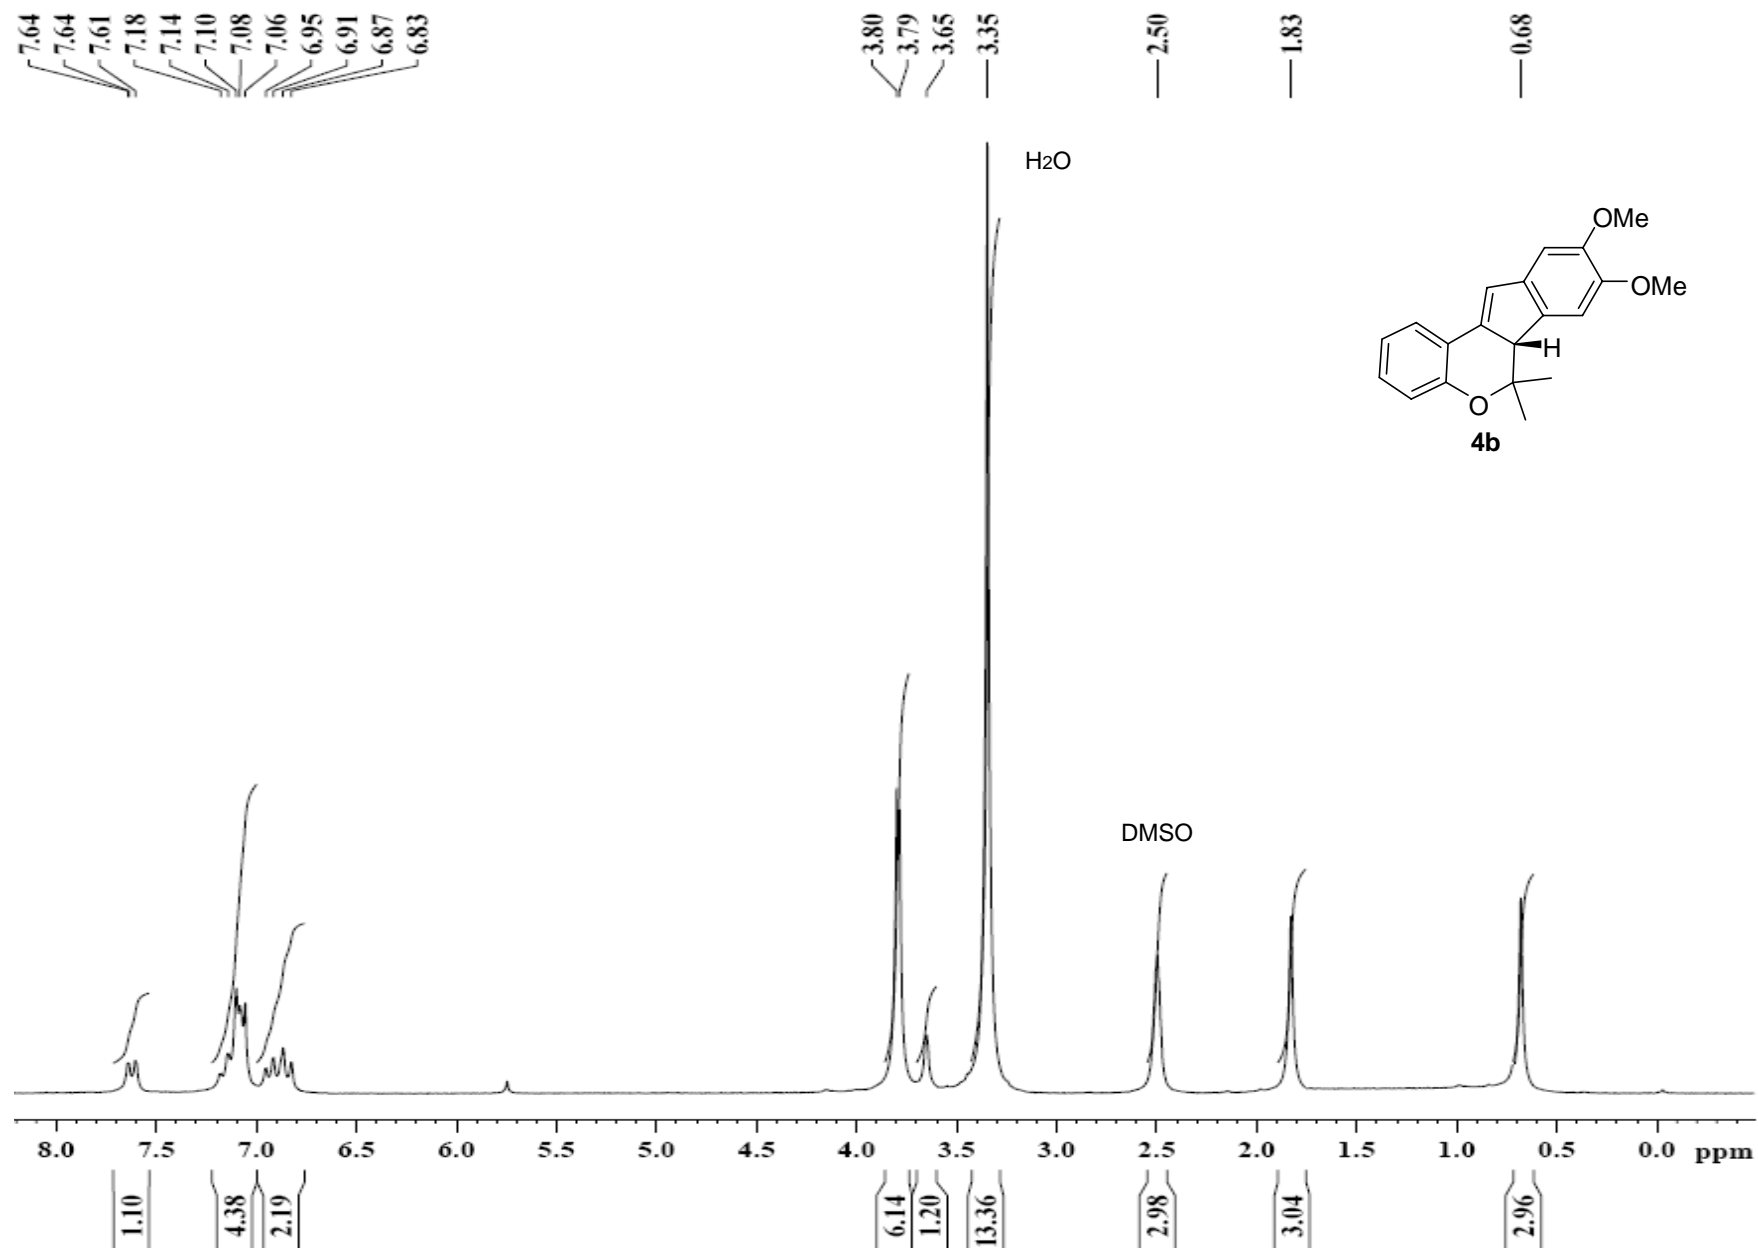

Fig. S-33: <sup>1</sup>H NMR of 8,9-dimethoxy-6,6-dimethyl-6,6a-dihydroindeno[1,2-c]chromene (4b)

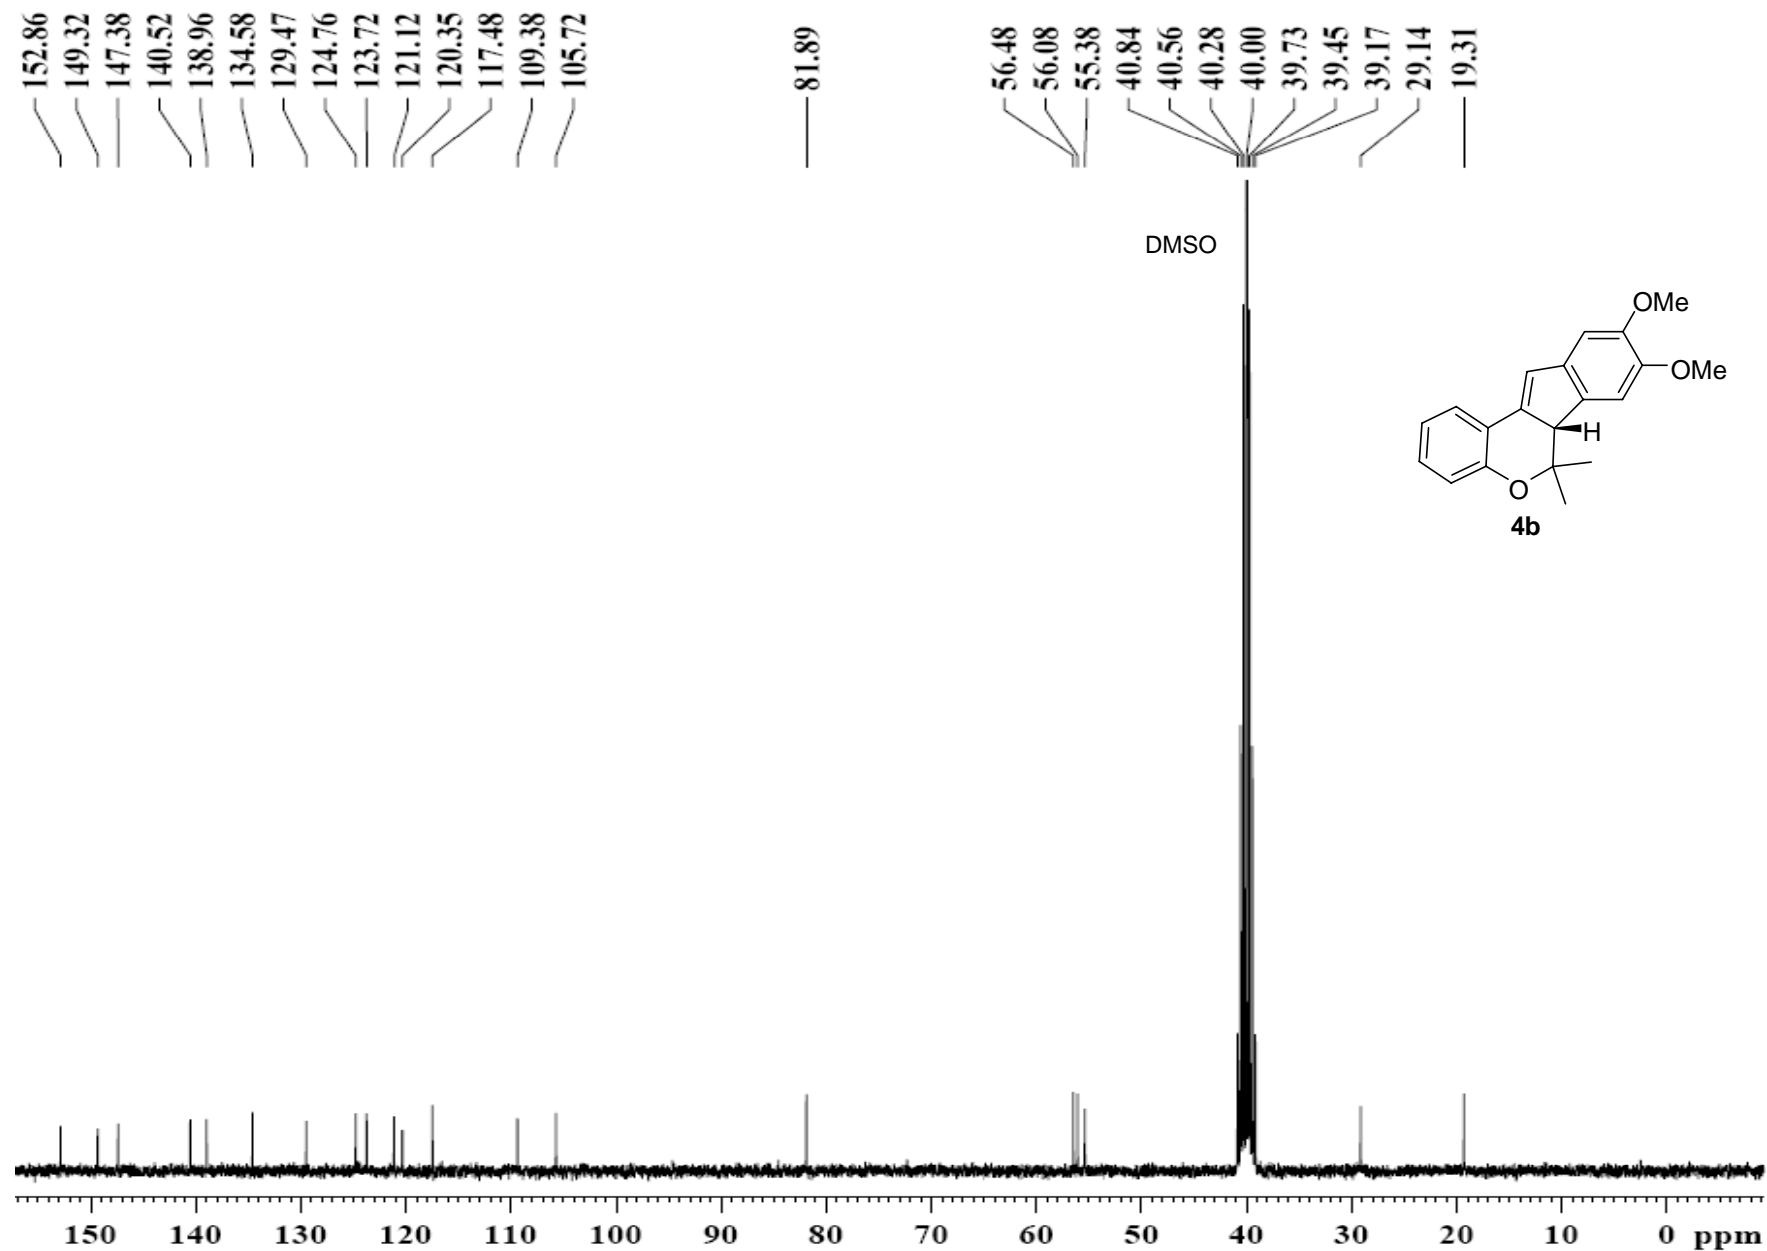

Fig. S-34: <sup>13</sup>C NMR of 8,9-dimethoxy-6,6-dimethyl-6,6a-dihydroindeno[1,2-c]chromene (4b)

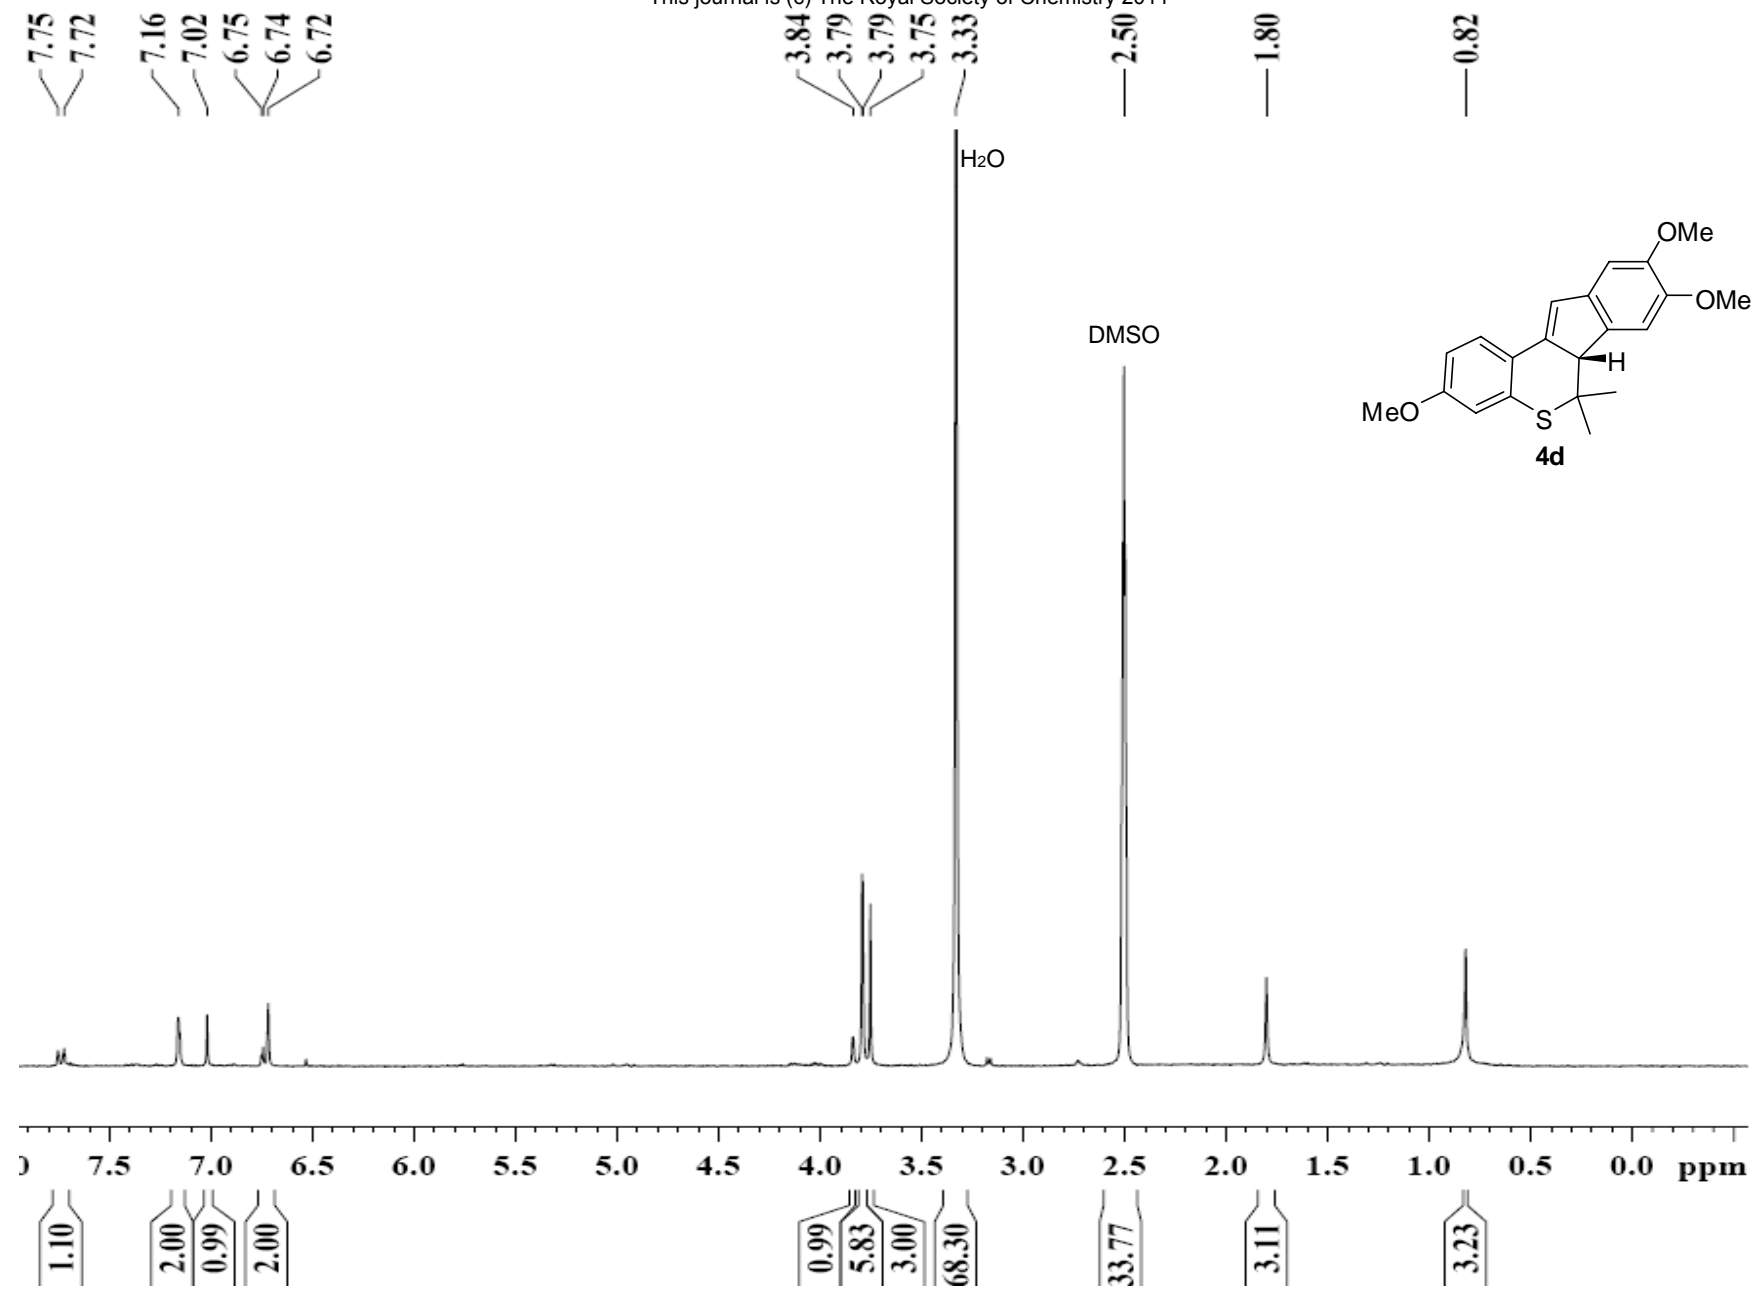

Fig. S-35:  $^1\text{H}$  NMR of 3,8,9-trimethoxy-6,6-dimethyl-6,6a-dihydroindeno[1,2-c]thiochromene (4d)

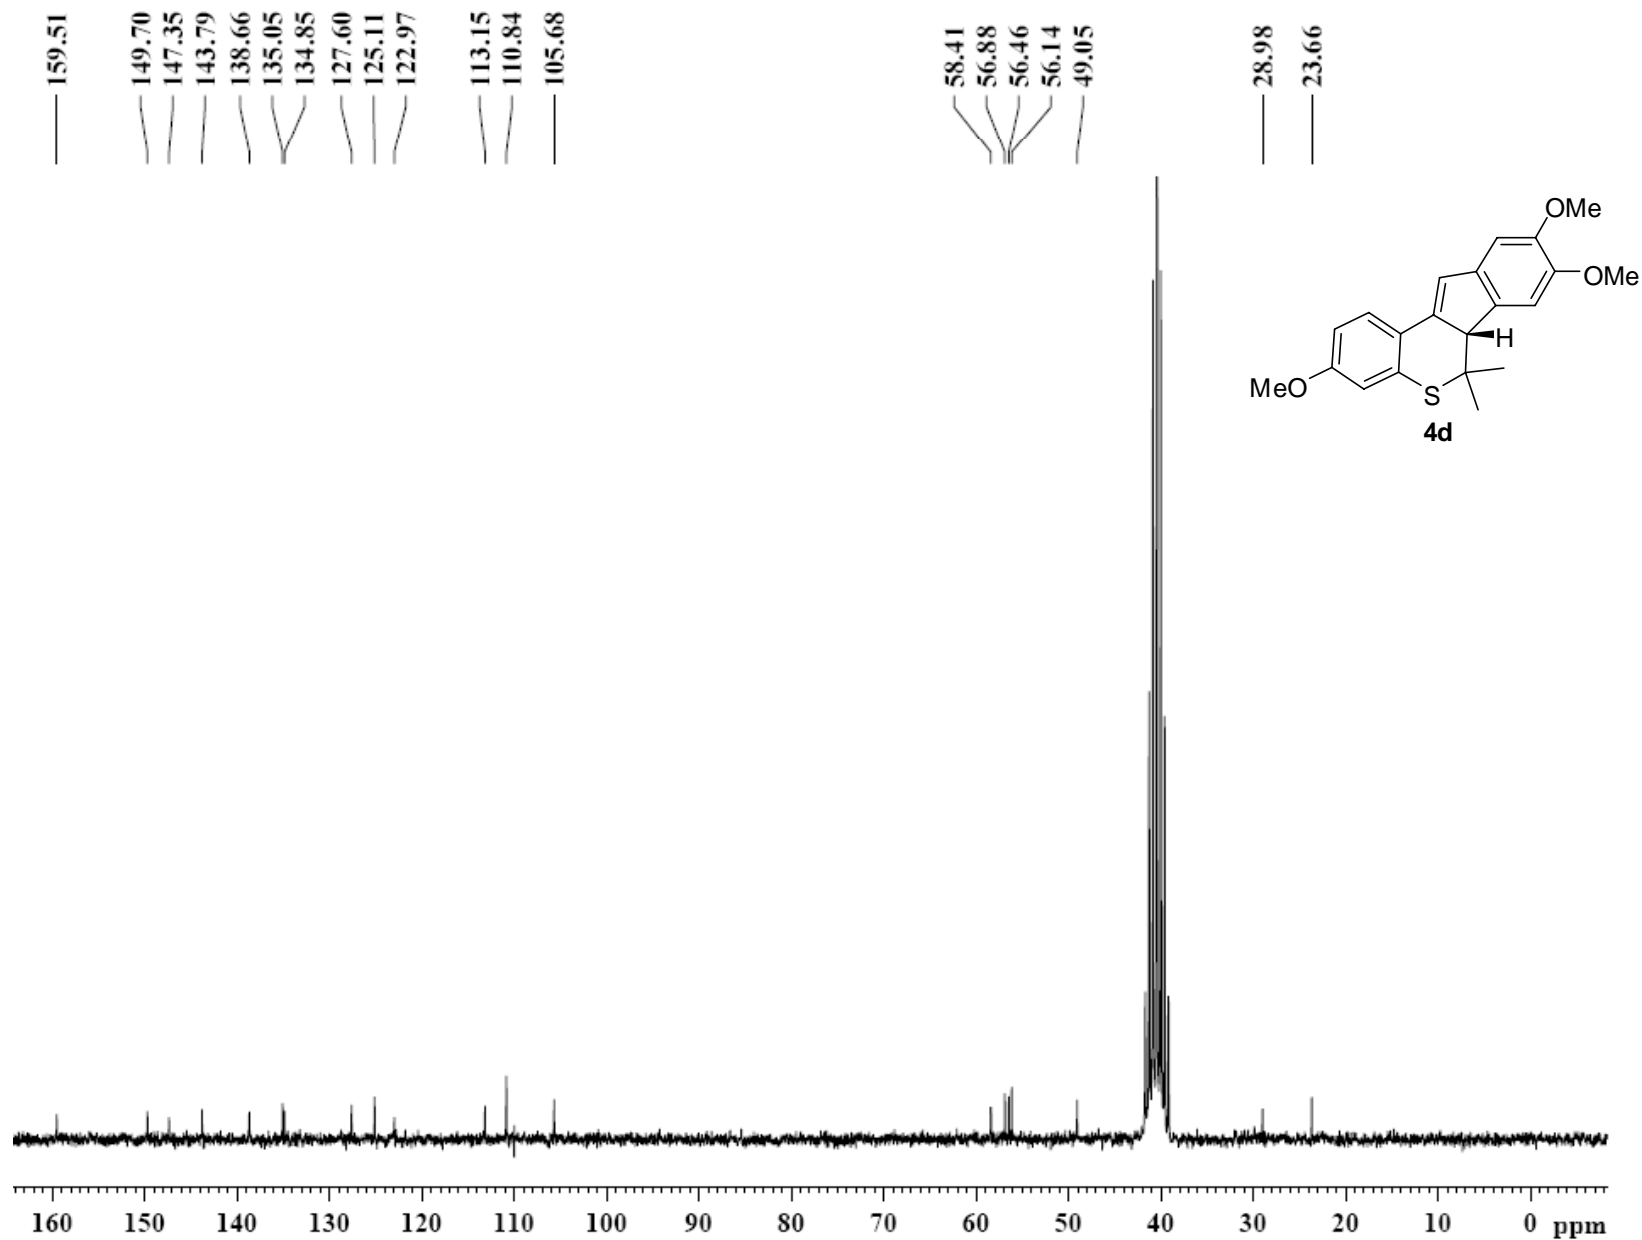

Fig. S-36:  $^{13}\text{C}$  NMR 3,8,9-trimethoxy-6,6-dimethyl-6,6a-dihydroindeno[1,2-c]thiochromene (**4d**)

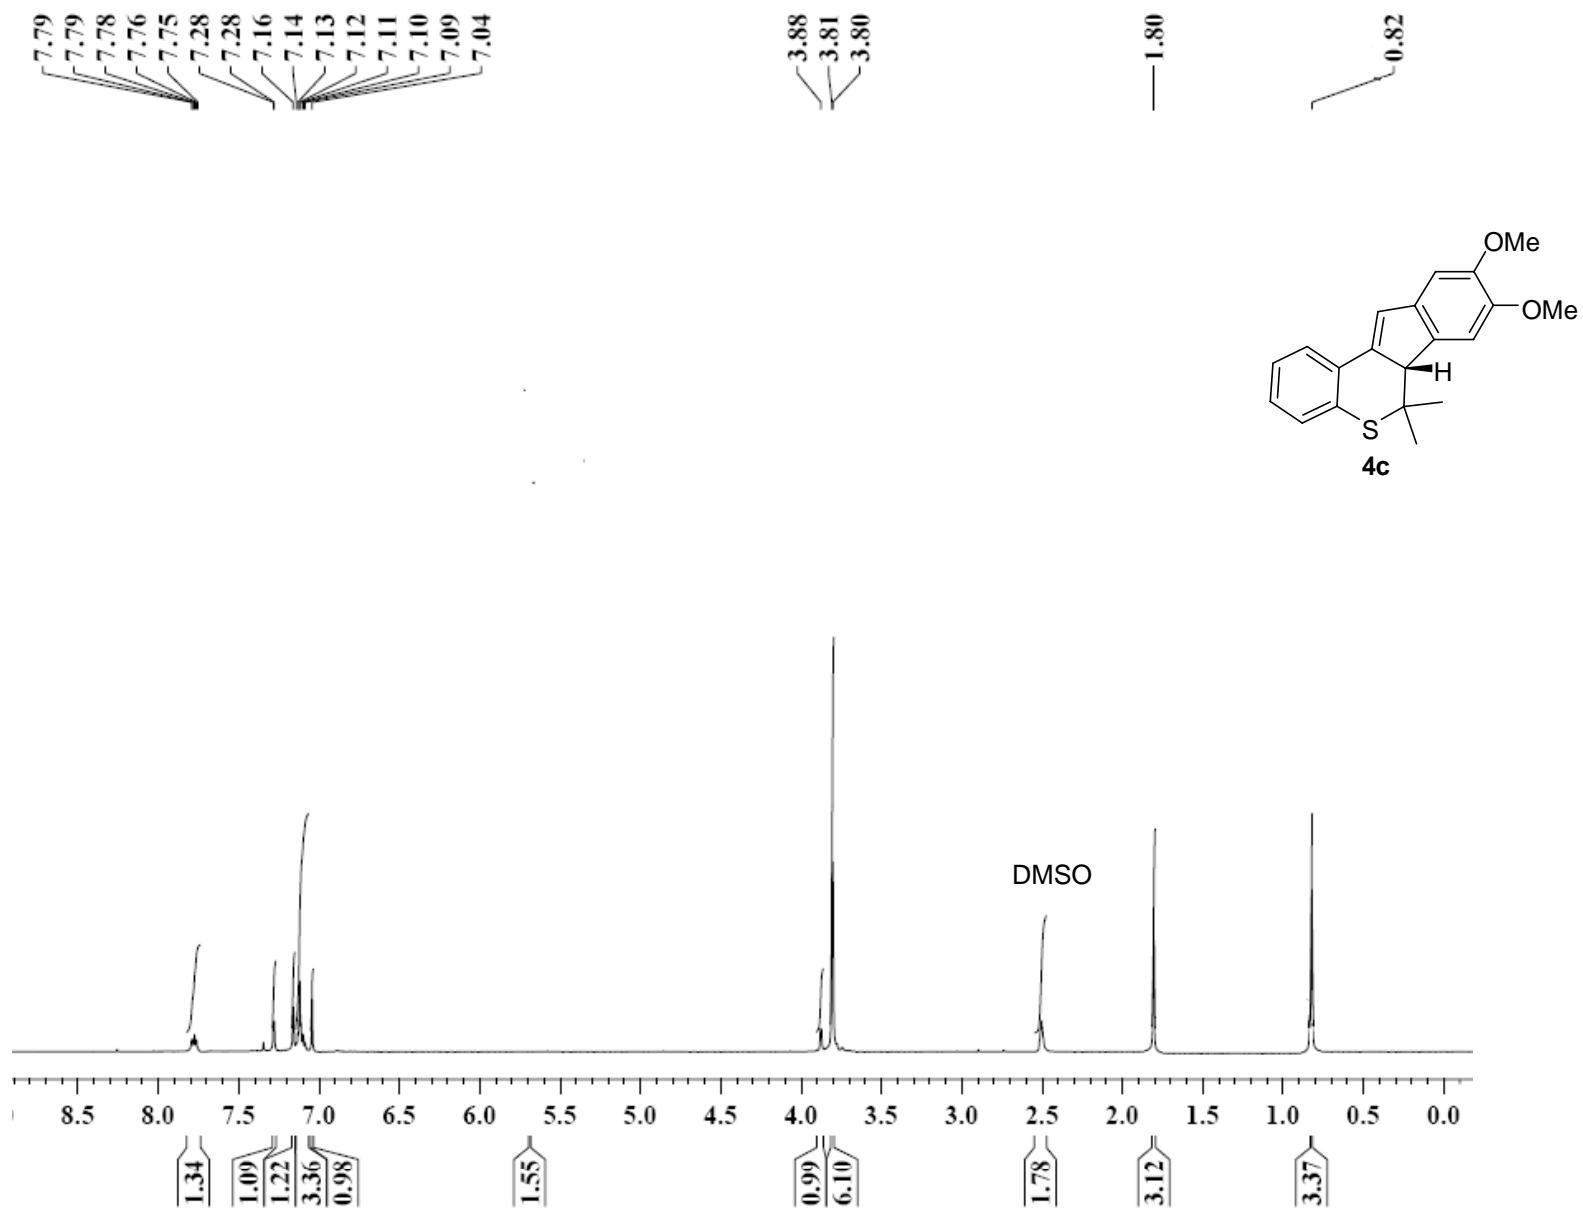

Fig. S-37: <sup>1</sup>H NMR of 8,9-dimethoxy-6,6-dimethyl-6,6a-dihydroindeno[1,2-c]thiochromene (**4c**)

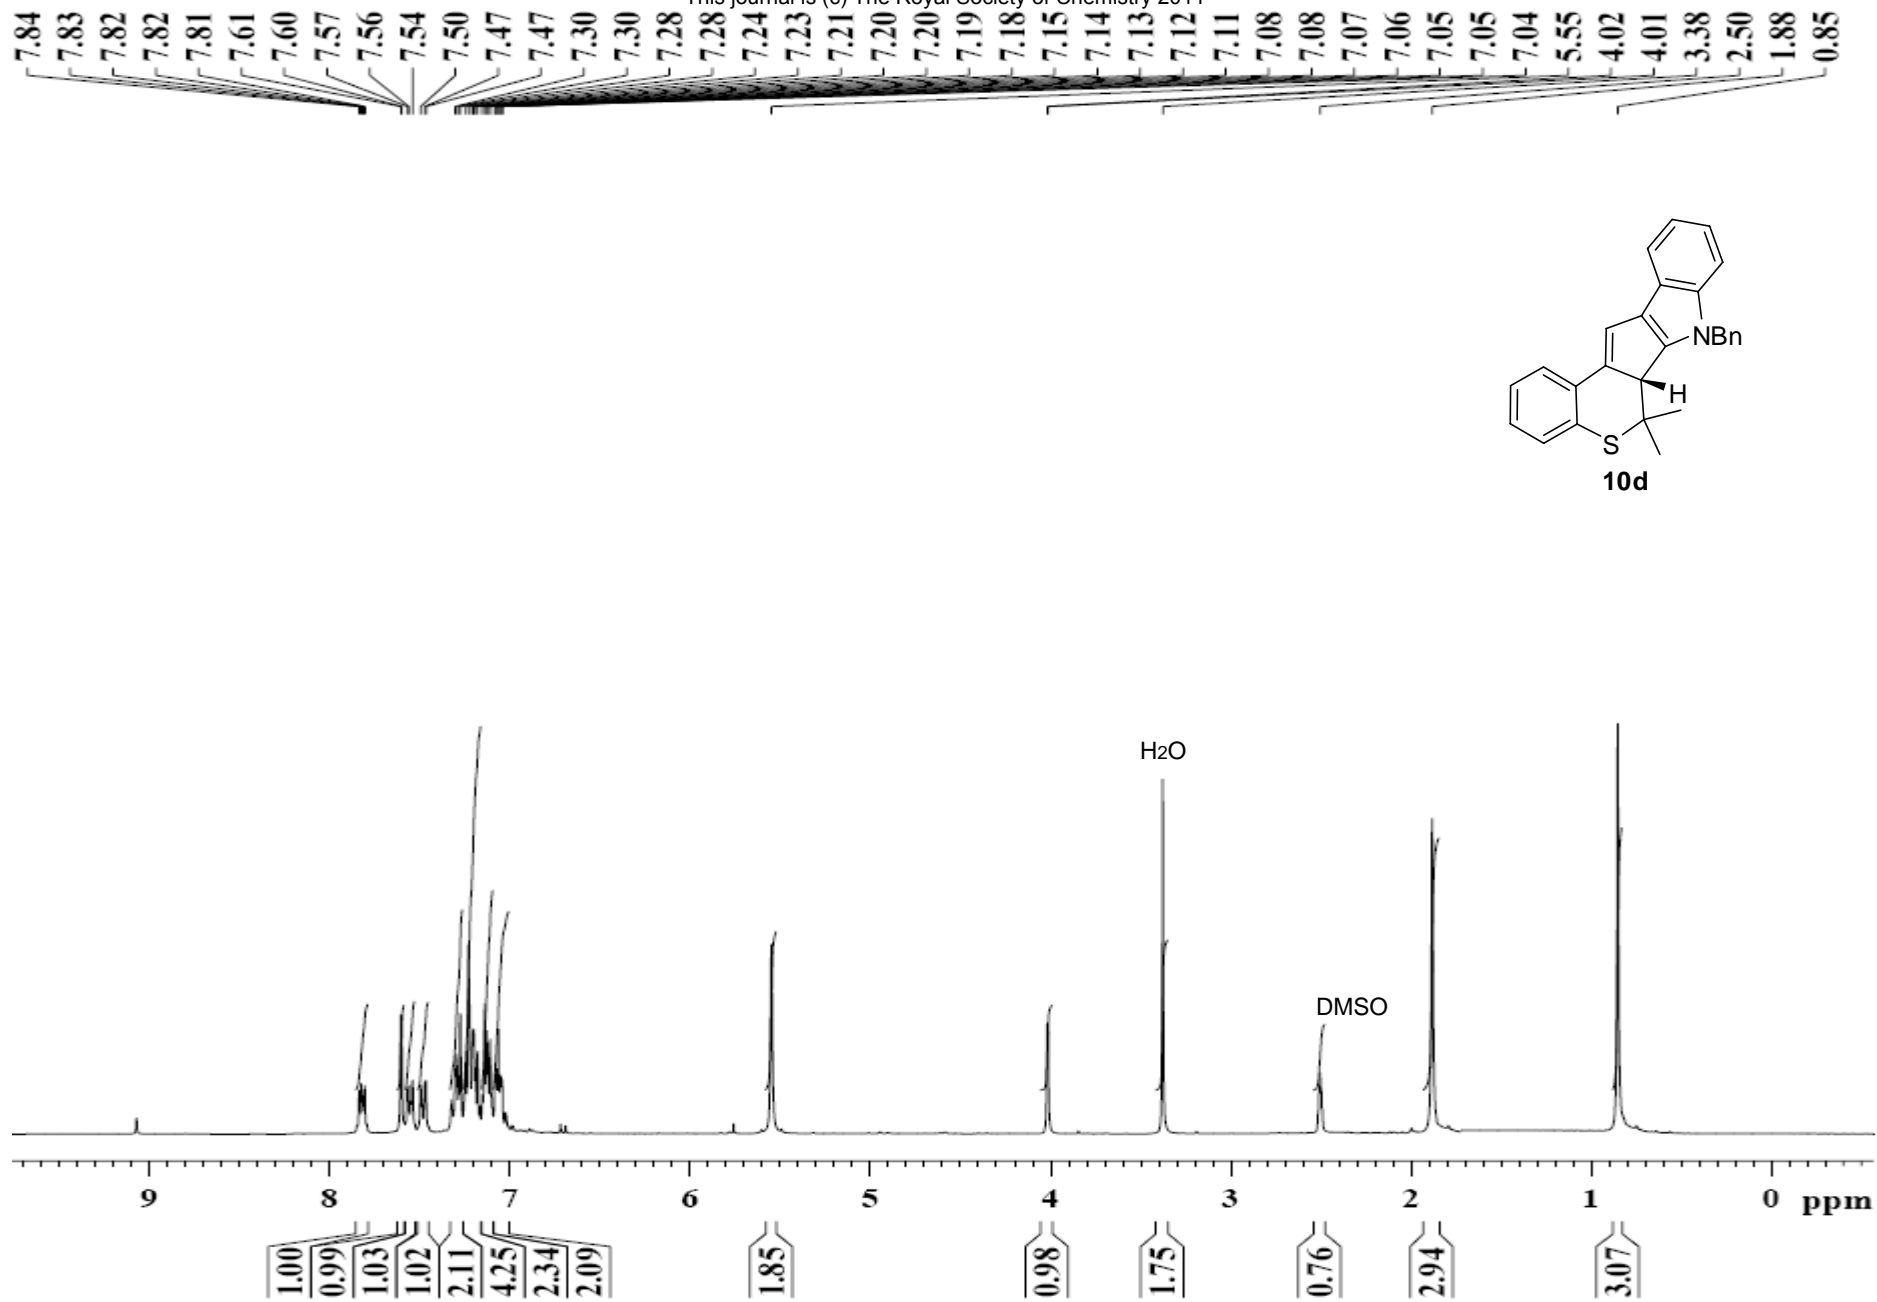Fig. S-38: <sup>1</sup>H NMR of 7-Benzyl-6,6-dimethyl-6a,7-dihydro-6H-5-thia-7-aza-benzo[4,5]pentaleno[2,1-a]naphthalene (10d) 39

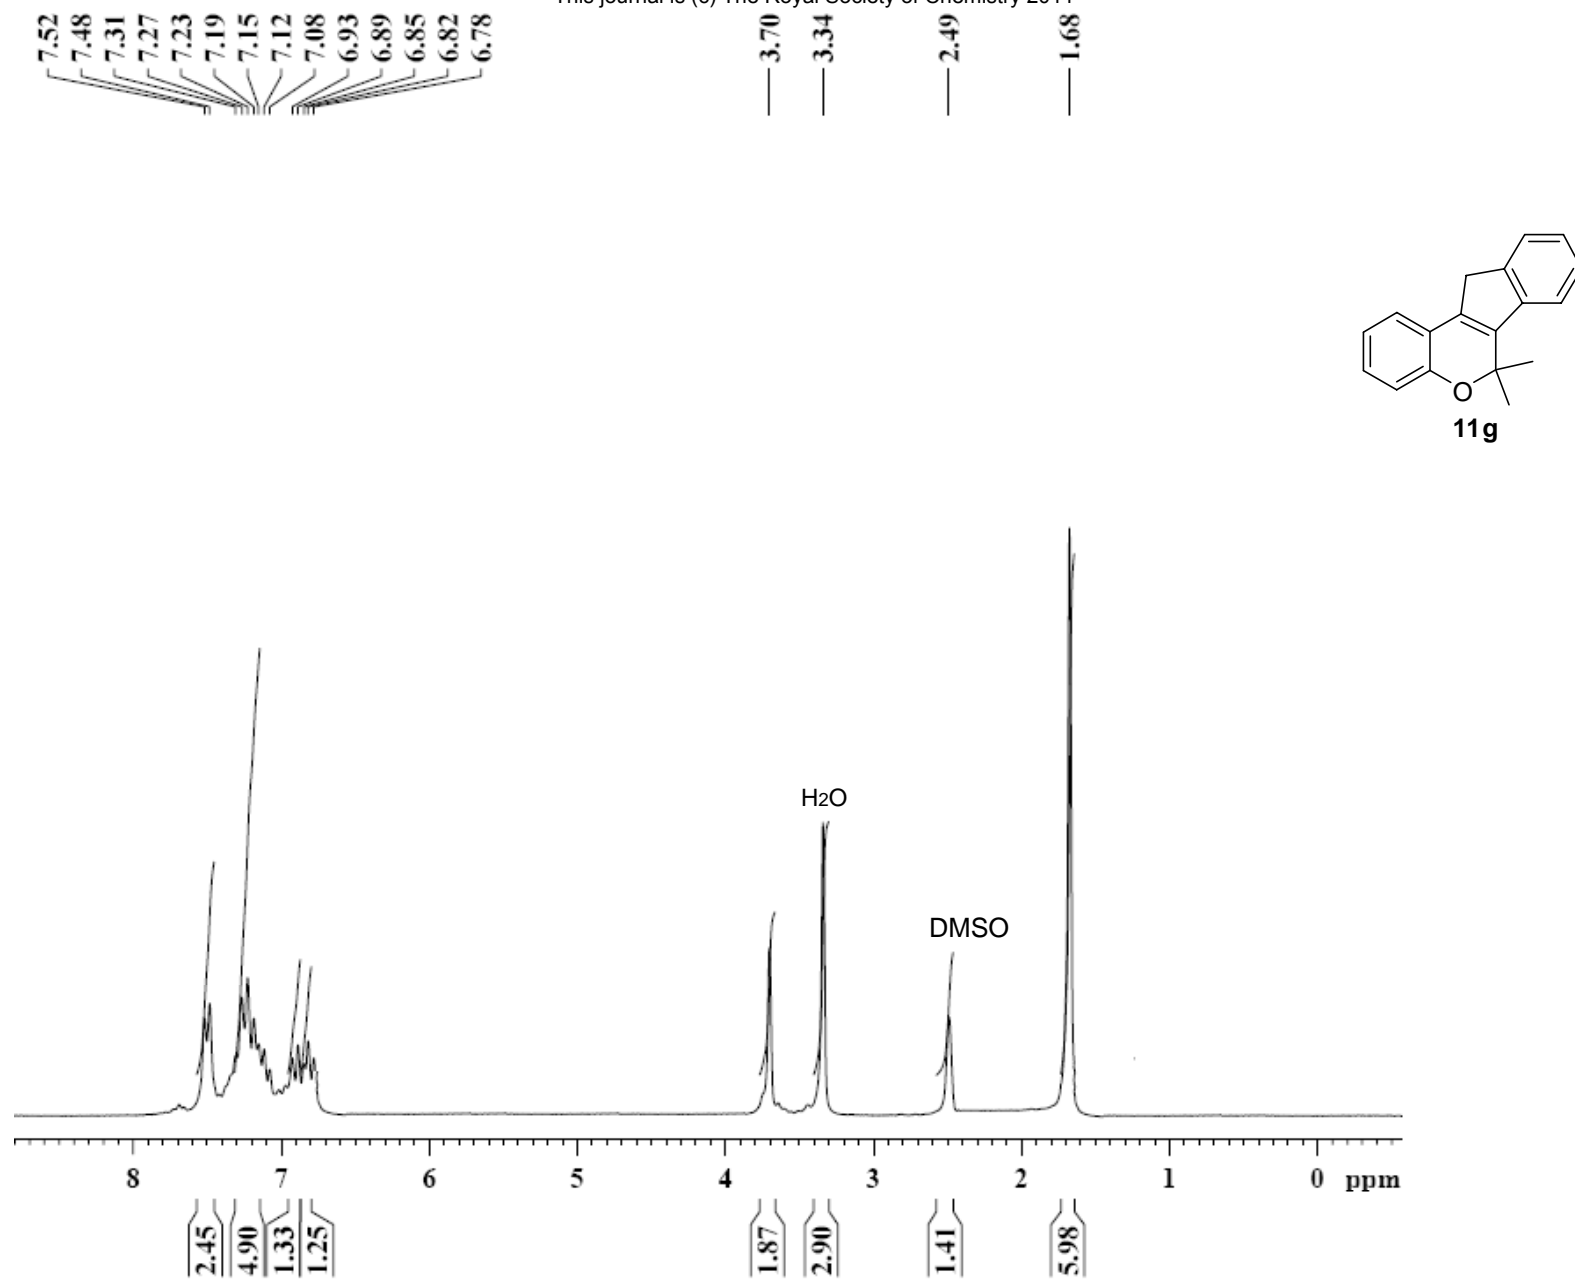

Fig. S-39: <sup>1</sup>H NMR of 6,6-dimethyl-6,11-dihydroindeno[1,2-c]chromene (11g)



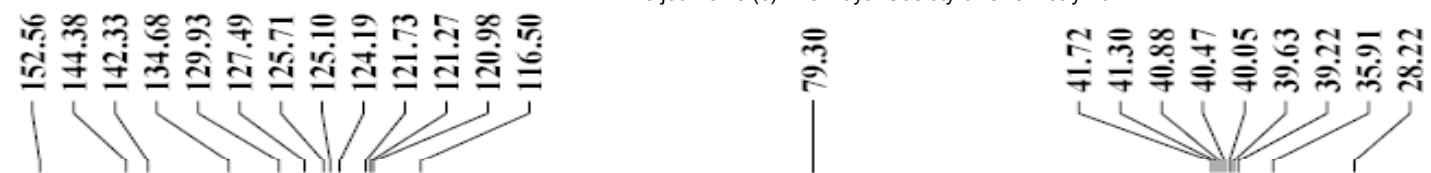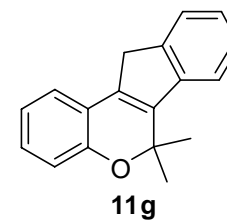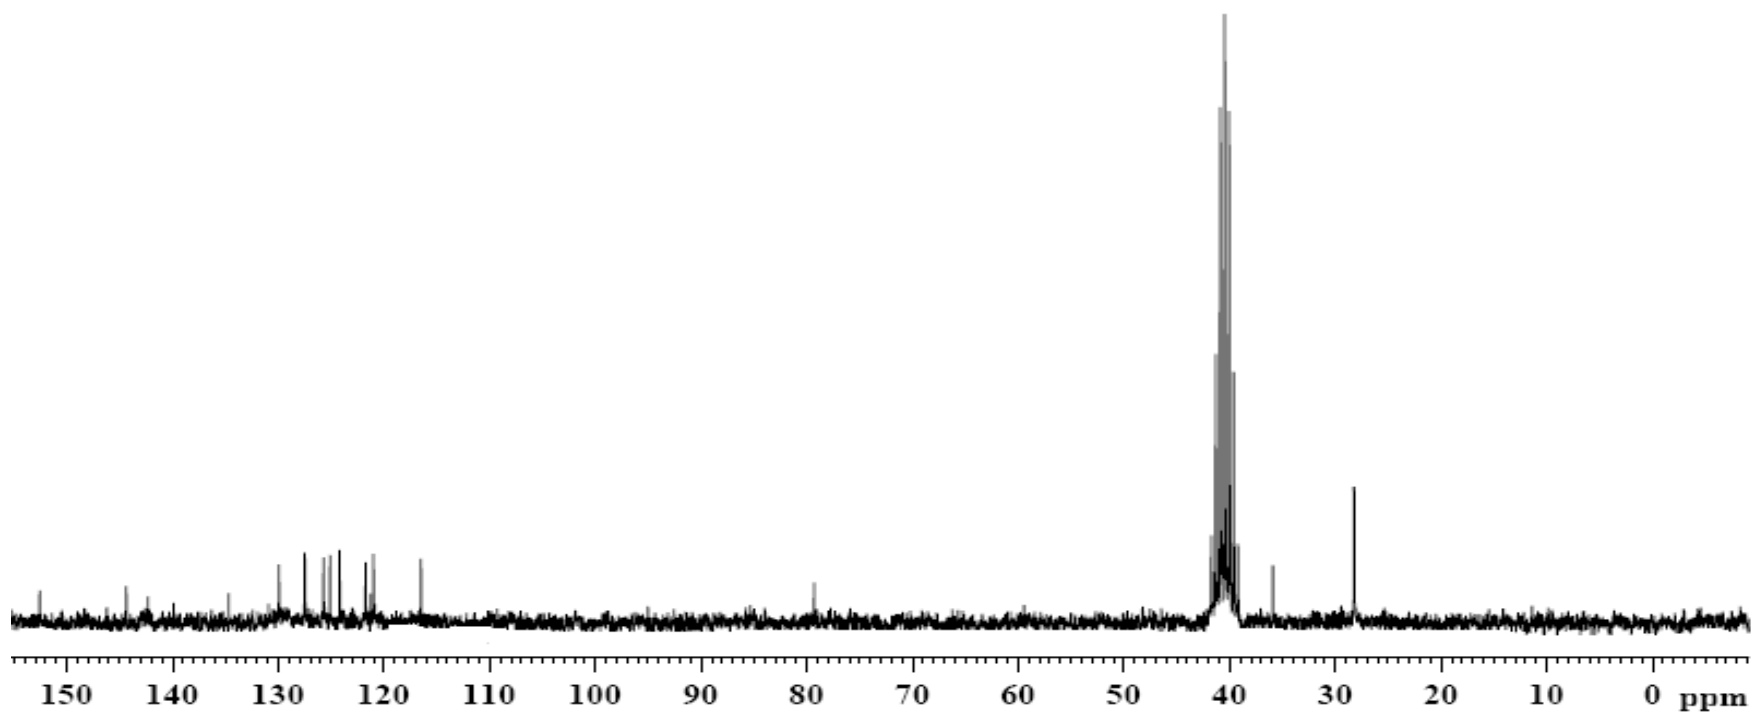

Fig. S-40:  $^{13}\text{C}$  NMR of 6,6-dimethyl-6,11-dihydroindeno[1,2-c]chromene (11g)

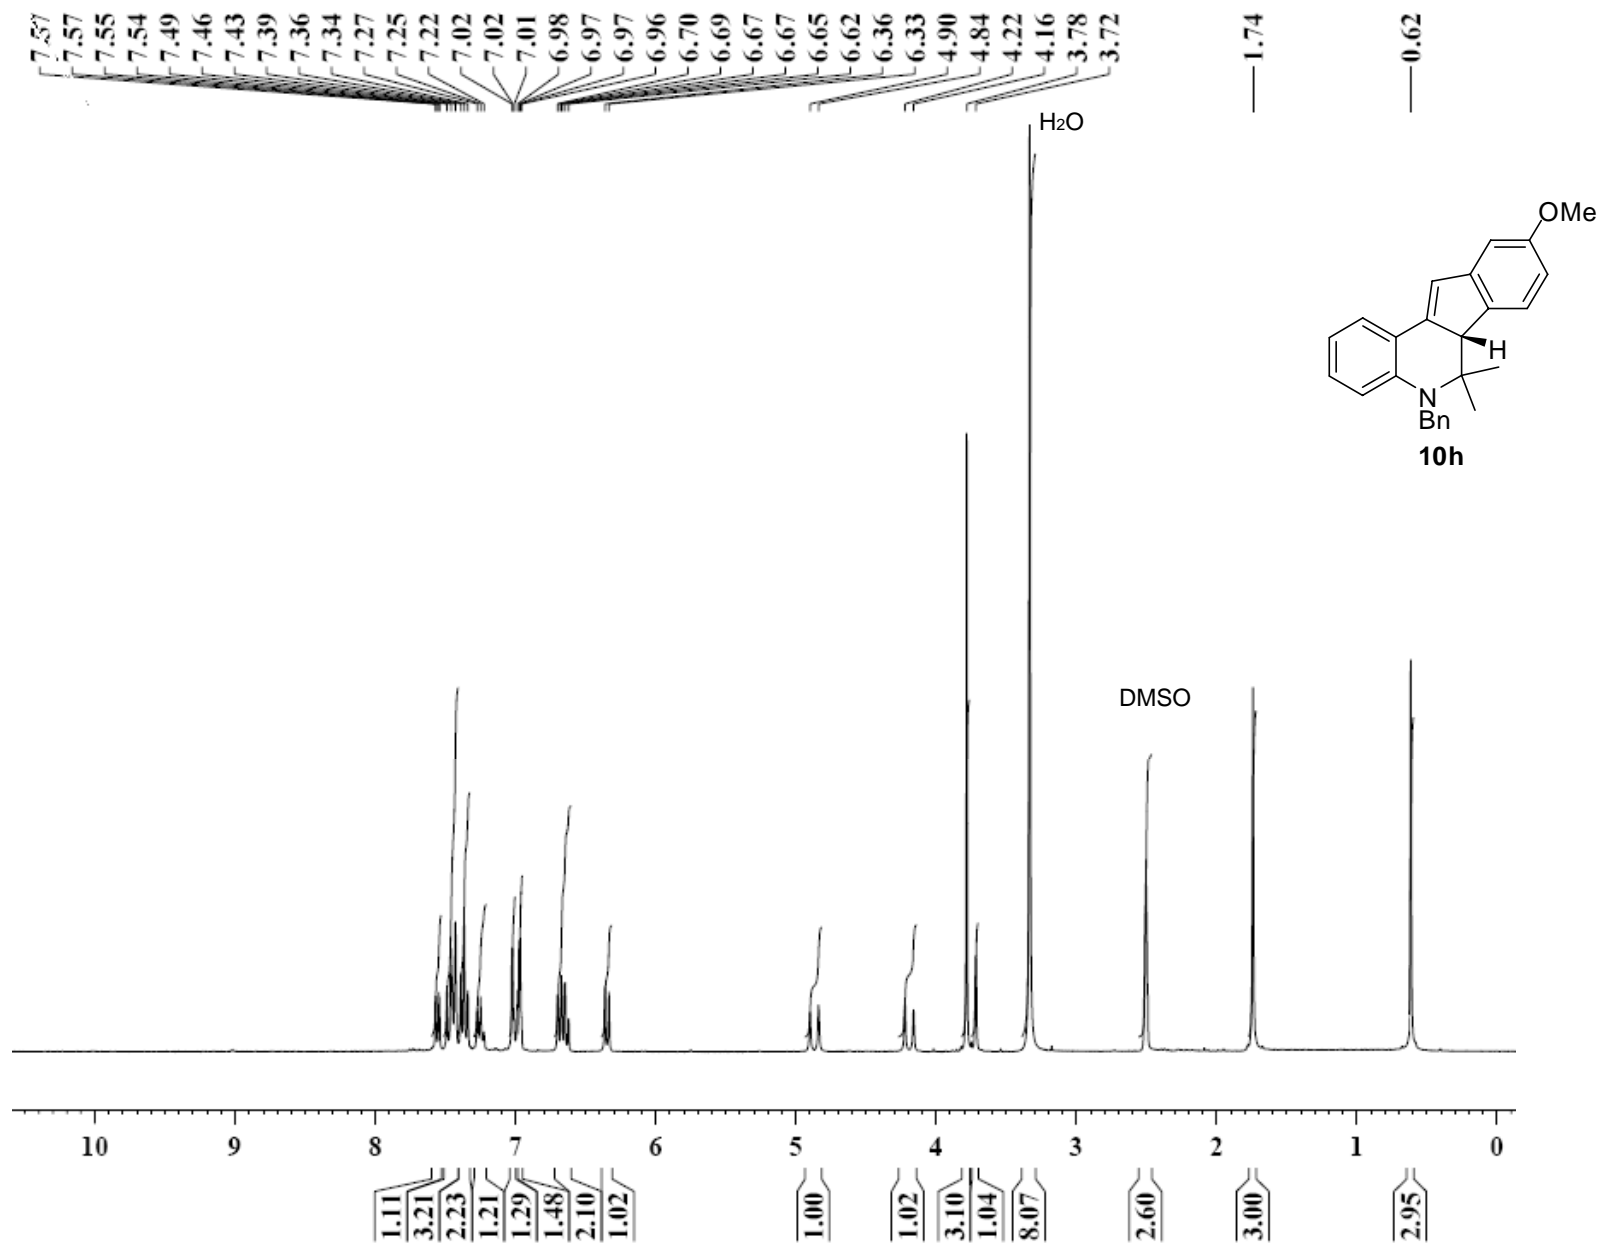

Fig. S-41: <sup>1</sup>H NMR of 5-benzyl-9-methoxy-6,6-dimethyl-6,6a-dihydro-5H-indeno[1,2-c]quinoline (10h)

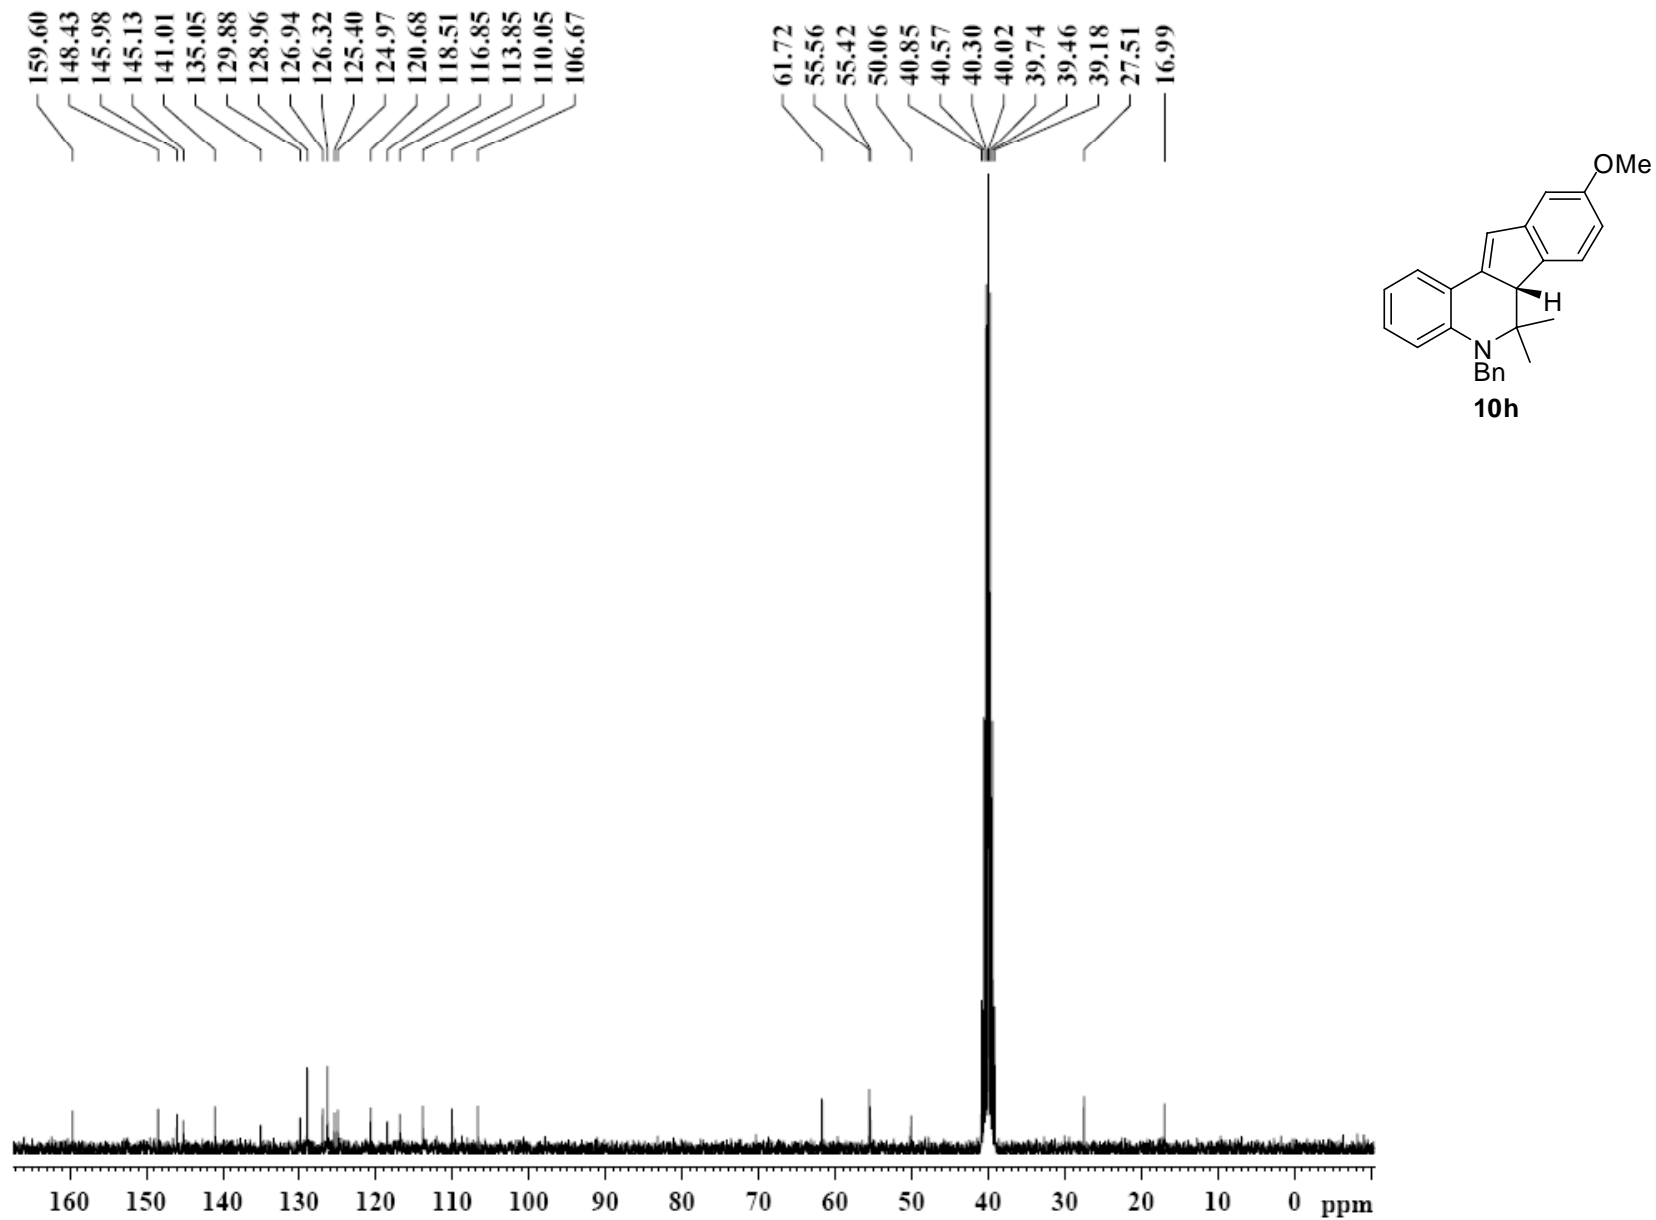

Fig. S-42:  $^{13}\text{C}$  NMR of 5-benzyl-9-methoxy-6,6-dimethyl-6,6a-dihydro-5H-indeno[1,2-c]quinoline (10h)

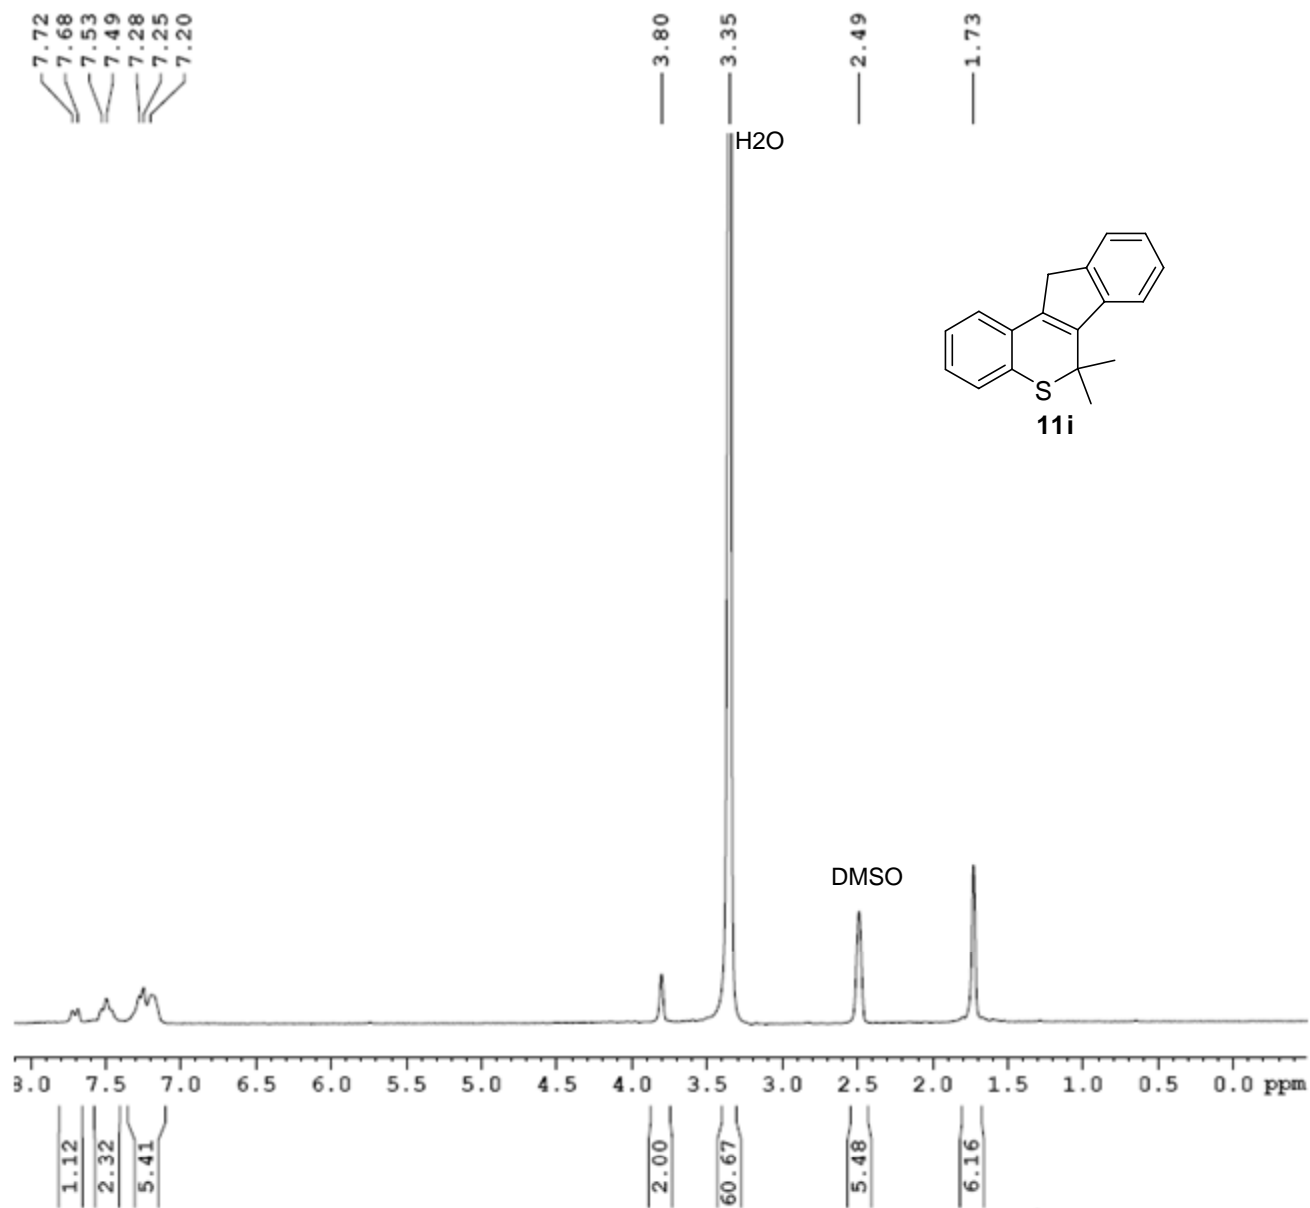

Fig. S-43: <sup>1</sup>H NMR of 6,6-dimethyl-6,11-dihydroindeno[1,2-c]thiochromene (11i)

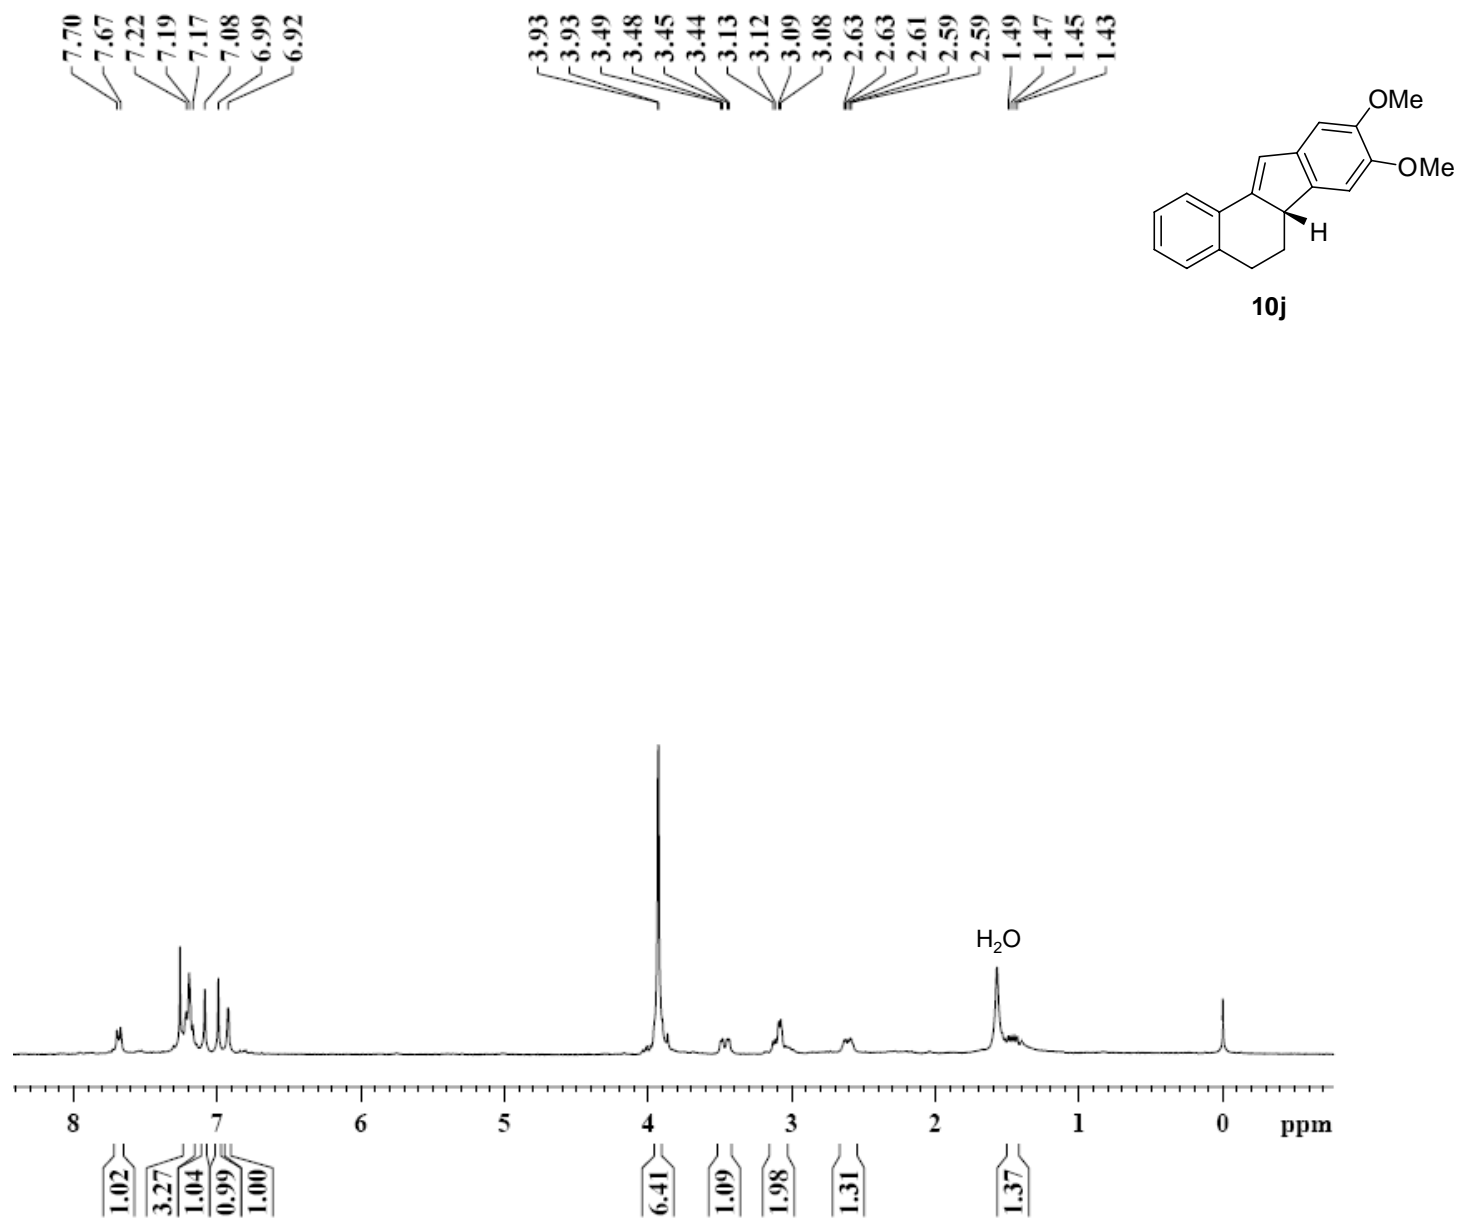

Fig. S-44: <sup>1</sup>H NMR of 8,9-dimethoxy-6,6a-dihydro-5H-benzo[a]fluorene (10j)

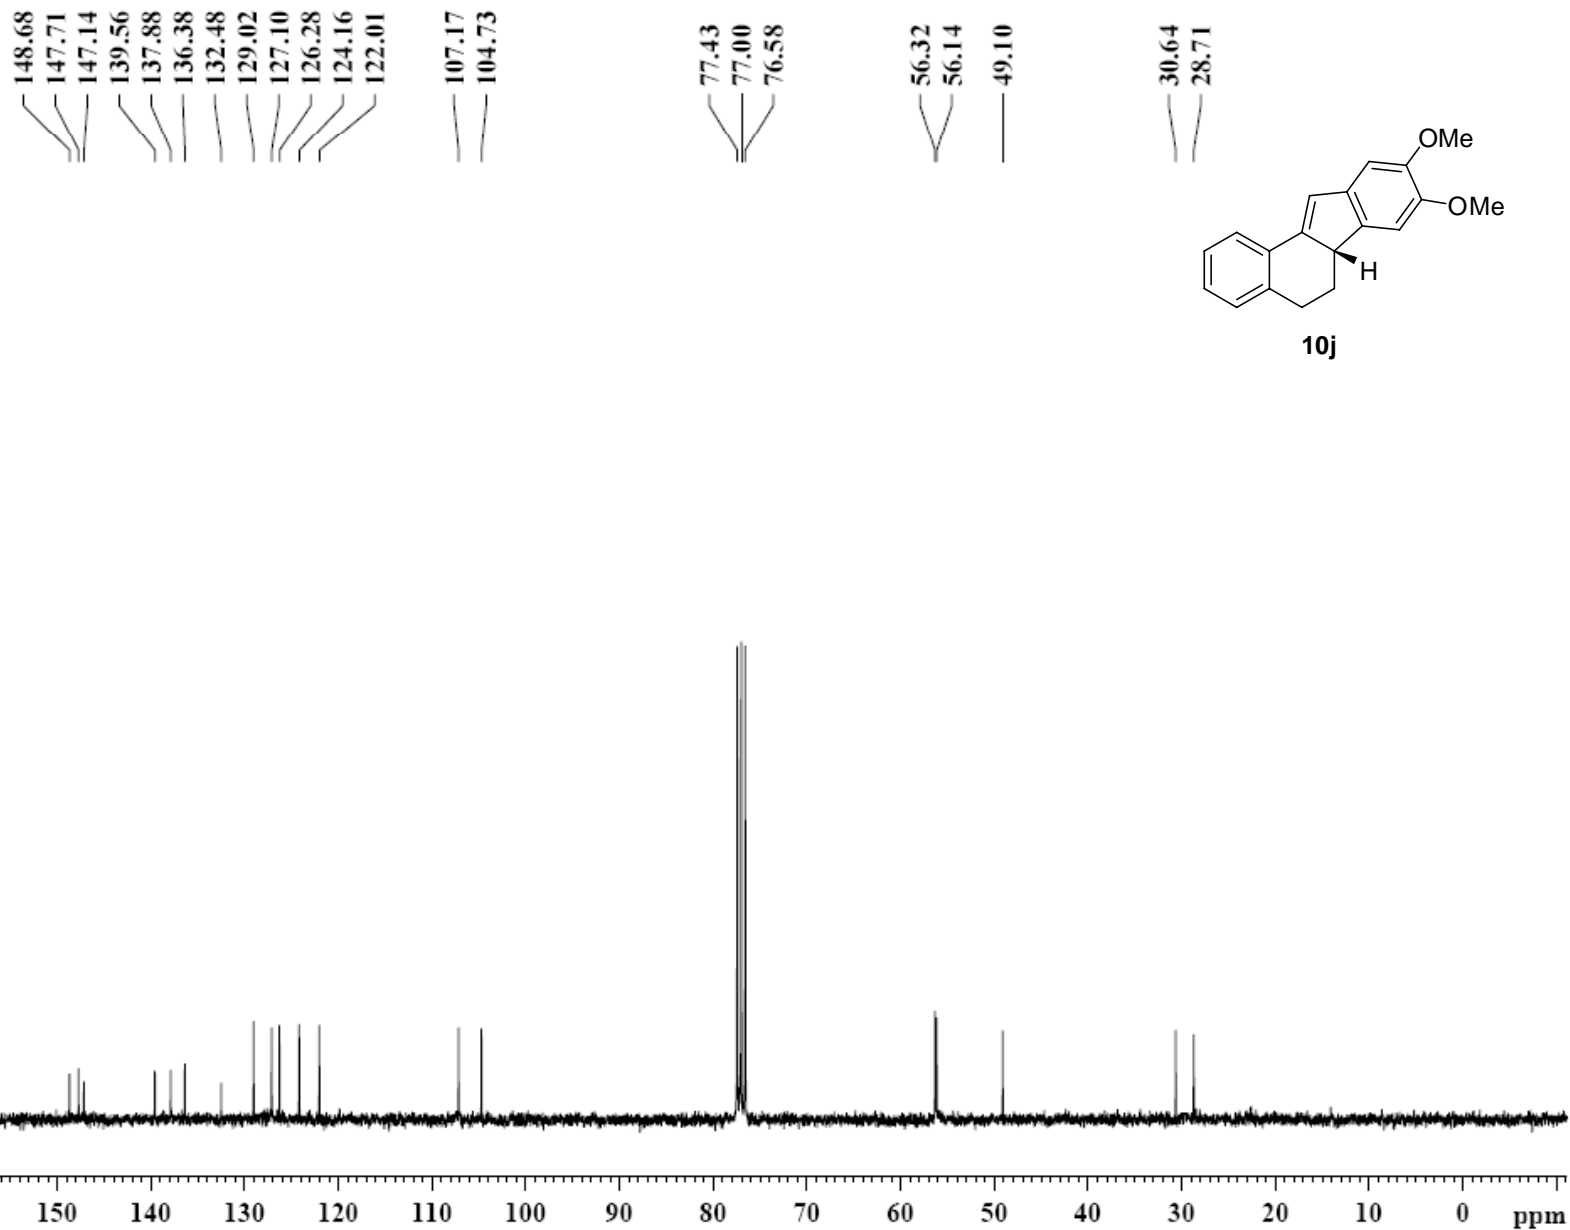

Fig. S-45:  $^{13}\text{C}$  NMR of 8,9-dimethoxy-6,6a-dihydro-5H-benzo[a]fluorene (10j)
